# Supplementary material for: Effects of photobiomodulation therapy in patients with chronic non-specific low back pain: protocol for a randomised placebo-controlled trial
Source: PubMed Central journal article supplement — BMJ Open. 2017 Oct 24;7(10):e017202. doi: 10.1136/bmjopen-2017-017202 (PMC5665327; doi:10.1136/bmjopen-2017-017202), 2017-10-24
Supplement: bmjopen-2017-017202.draft_revisions.pdf [file bmjopen-2017-017202.draft_revisions.pdf]

# BMJ Open

BMJ Open is committed to open peer review. As part of this commitment we make the peer review history of every article we publish publicly available.

When an article is published we post the peer reviewers' comments and the authors' responses online. We also post the versions of the paper that were used during peer review. These are the versions that the peer review comments apply to.

The versions of the paper that follow are the versions that were submitted during the peer review process. They are not the versions of record or the final published versions. They should not be cited or distributed as the published version of this manuscript.

BMJ Open is an open access journal and the full, final, typeset and author-corrected version of record of the manuscript is available on our site with no access controls, subscription charges or pay-per-view fees (<http://bmjopen.bmj.com>).

If you have any questions on BMJ Open's open peer review process please email [editorial.bmjopen@bmj.com](mailto:editorial.bmjopen@bmj.com)

# BMJ Open

## Effects of photobiomodulation therapy in patients with chronic non-specific low back pain: protocol for a randomized placebo-controlled trial

|                                 |                                                                                                                                                                                                                                                                                                                                                                                                                                                                                                                                                                                                                                                                                                                                                                                                                                                                  |
|---------------------------------|------------------------------------------------------------------------------------------------------------------------------------------------------------------------------------------------------------------------------------------------------------------------------------------------------------------------------------------------------------------------------------------------------------------------------------------------------------------------------------------------------------------------------------------------------------------------------------------------------------------------------------------------------------------------------------------------------------------------------------------------------------------------------------------------------------------------------------------------------------------|
| Journal:                        | <i>BMJ Open</i>                                                                                                                                                                                                                                                                                                                                                                                                                                                                                                                                                                                                                                                                                                                                                                                                                                                  |
| Manuscript ID                   | bmjopen-2017-017202                                                                                                                                                                                                                                                                                                                                                                                                                                                                                                                                                                                                                                                                                                                                                                                                                                              |
| Article Type:                   | Protocol                                                                                                                                                                                                                                                                                                                                                                                                                                                                                                                                                                                                                                                                                                                                                                                                                                                         |
| Date Submitted by the Author:   | 10-Apr-2017                                                                                                                                                                                                                                                                                                                                                                                                                                                                                                                                                                                                                                                                                                                                                                                                                                                      |
| Complete List of Authors:       | Tomazoni, Shaiane; Universidade Cidade de Sao Paulo, Masters and Doctoral Programs in Physical Therapy<br>Costa, Lucíola; Universidade Cidade de Sao Paulo, Masters and Doctoral Programs in Physical Therapy<br>Guimarães, Layana; Universidade Cidade de Sao Paulo, Masters and Doctoral Programs in Physical Therapy<br>Araujo, Amanda; Universidade Cidade de Sao Paulo, Masters and Doctoral Programs in Physical Therapy<br>Nascimento, Dafne; Universidade Cidade de Sao Paulo, Masters and Doctoral Programs in Physical Therapy<br>Medeiros, Flavia; Universidade Cidade de Sao Paulo, Masters and Doctoral Programs in Physical Therapy<br>Avanzi, Marina; Universidade Cidade de Sao Paulo, Masters and Doctoral Programs in Physical Therapy<br>Costa, Leonardo; Universidade Cidade de Sao Paulo, Masters and Doctoral Programs in Physical Therapy |
| <b>Primary Subject Heading</b>: | Evidence based practice                                                                                                                                                                                                                                                                                                                                                                                                                                                                                                                                                                                                                                                                                                                                                                                                                                          |
| Secondary Subject Heading:      | Rehabilitation medicine                                                                                                                                                                                                                                                                                                                                                                                                                                                                                                                                                                                                                                                                                                                                                                                                                                          |
| Keywords:                       | chronic low back pain, photobiomodulation therapy, low-level laser therapy, LLLT, PBMT                                                                                                                                                                                                                                                                                                                                                                                                                                                                                                                                                                                                                                                                                                                                                                           |
|                                 |                                                                                                                                                                                                                                                                                                                                                                                                                                                                                                                                                                                                                                                                                                                                                                                                                                                                  |

SCHOLARONE™  
Manuscripts

1  
2  
3 **Effects of photobiomodulation therapy in patients with chronic non-specific low back**  
4 **pain: protocol for a randomized placebo-controlled trial**  
5  
6  
7

8 Shaiane Silva Tomazoni<sup>1\*</sup>, Lucíola da Cunha Menezes Costa<sup>1</sup>, Layana de Souza Guimarães<sup>1</sup>,  
9 Amanda Costa Araujo<sup>1</sup>, Dafne Port Nascimento<sup>1</sup>, Flavia Cordeiro Medeiros<sup>1</sup>, Marina  
10 Athayde Avanzi<sup>1</sup> and Leonardo Oliveira Pena Costa<sup>1</sup>  
11  
12

13  
14  
15 1. Masters and Doctoral Programs in Physical Therapy, Universidade Cidade de São Paulo,  
16 Brazil.  
17

18  
19  
20 **Trial registration number:** NCT03089424  
21

22  
23 **Funding statement:** This work was supported by FAPESP (postdoctoral scholarship of  
24 Shaiane Silva Tomazoni) grant number 2016/10265-0.  
25  
26

27  
28 **\*Author for correspondence:** Shaiane Silva Tomazoni  
29 Universidade Cidade de São Paulo. Rua Cesário Galeno, 448/475  
30 Tatuapé, São Paulo, SP, Brazil, 05508-900.  
31 e-mail: shaiane.tomazoni@gmail.com  
32  
33  
34

35  
36 **Author contributions**  
37

38  
39 SST and LOPC contributed to the concept and design of the study. SST and LOPC  
40 established the hypothesis and wrote the original proposal. SST, LCMC, LSG, ACA, DPN,  
41 FCM and LOPC contributed significantly in creating the manuscript. LCMC and LOPC  
42 performed critical revisions of the manuscript. SST, LCMC, LSG and LOPC wrote the final  
43 version of the manuscript. All authors read and approved the final version of the manuscript.  
44  
45  
46  
47  
48

49 **Number of figures and tables:** 2 figures and 0 tables.  
50

51  
52  
53 **Conflict of interest:** the authors declare no conflict of interest.  
54  
55  
56  
57  
58  
59  
60

## ABSTRACT

**Introduction:** Low back pain (LBP) is one of the largest and most frequent public health problems. LBP is highly associated with absenteeism from work and generates excessive costs for health systems. Photobiomodulation therapy (PBMT) is a frequently used non-pharmacological therapy for the treatment of musculoskeletal disorders. However, there is little high-quality scientific evidence that demonstrates the effectiveness of PBMT in the treatment of patients with chronic LBP in the short, medium, and long term. Therefore, the objective of this clinical trial is to evaluate the effects of PBMT in patients with chronic non-specific LBP in the short, medium, and long term. **Methods and analyses:** This is a prospectively registered, two-arm randomized placebo-controlled trial with blinded patients, assessors and treatment providers. One hundred and forty-eight patients with chronic non-specific LBP will be recruited. Treatment sessions will be provided 3 times a week for 4 weeks (totaling 12 sessions) with patients receiving either placebo or active PBMT. For ethical reasons, all patients, regardless of treatment allocation, will also receive an information booklet based on "The Back Book". Clinical outcomes will be measured at baseline, at the end of treatment, as well as 3, 6, and 12 months after randomization. The primary outcomes will be pain intensity and disability measured after 12 sessions of treatment. The secondary outcomes will be pain intensity and disability measured at 3, 6, and 12 months after randomization, in addition to specific disability and global perceived effect in all time points. **Ethics and dissemination:** The study was approved by the Research Ethics Committee of Universidade Cidade de São Paulo. The results will be disseminated through scientific publications and presentations at national and international scientific meetings. Clinical trial registration number: NCT03089424 (clinicaltrials.gov).

**Key-words:** chronic low back pain, photobiomodulation therapy, low-level laser therapy, LLLT, PBMT.

### Strengths and limitations of this study:

- The present study can be considered to have high methodological quality, since it is a randomized, controlled, and prospectively registered clinical trial.
- One of the strengths of the study is that it is triple-blind, i.e., evaluators, therapists, and patients will be blinded to interventions over the course of the study.

1  
2  
3  
4  
5  
6  
7  
8  
9  
10  
11  
12  
13  
14  
15  
16  
17  
18  
19  
20  
21  
22  
23  
24  
25  
26  
27  
28  
29  
30  
31  
32  
33  
34  
35  
36  
37  
38  
39  
40  
41  
42  
43  
44  
45  
46  
47  
48  
49  
50  
51  
52  
53  
54  
55  
56  
57  
58  
59  
60

- The sample size was calculated to provide the appropriate statistical power to detect differences in the primary outcomes of the study.
- We believe that our study does not present limitations.

For peer review only

## INTRODUCTION

Low back pain (LBP) is one of the greatest and most frequent public health problems, generating high levels of absenteeism at work and excessive costs to health systems (1-3). Recently, LBP was ranked as one of the seven most frequent health problems and as the debilitating symptom that affects the world's population for the largest number of years (4). It is estimated that about 12% of the world's population suffers from LBP (5). The prognosis of this condition is directly related to the duration of symptoms, with less favorable prognoses in patients with chronic LBP (i.e. with a duration of symptoms longer than three months) (6-10). Therefore, the ideal treatment for chronic LBP represents a significant challenge, since there are no treatments that truly minimize the intensity of symptoms. However, several interventions are effective in reducing pain and disability resulting from LBP in the long term (11).

The existing treatments for LBP can be divided into three categories: 1) pharmacological therapies, which trigger several adverse effects with prolonged use (12-14); 2) non-pharmacological therapies, which minimize undesirable effects and are moderately effective in LBP (15); and surgery, used only when conservative treatment is not efficient (16). Several therapies can be used to treat LBP by controlling symptoms, minimizing disability, and improving the patients' quality of life (17).

Photobiomodulation therapy (PBMT) is a non-pharmacological intervention often used in the treatment of musculoskeletal disorders such as LBP (18-21). PBMT consists in applying a non-ionized form of light, which includes laser (light amplification by stimulated emission of radiation), LED (light-emitting diodes), and other lights with a broader spectrum ranging from visible to infrared (22).

Evidence from recent years (18, 23-30) suggests that PBMT triggers positive physiological effects, such as increased microcirculation (31), increased ATP synthesis, stimulation of the mitochondrial respiratory chain (32, 33), stimulation of mitochondrial function (34), and factors that may influence the metabolism of various pathologies. In addition, there is evidence that PBMT reduces the release of reactive oxygen species (ROS) and creatine kinase (CK) activity, in addition to increasing the production of antioxidants and heat shock proteins (35, 36).

Studies have shown the effects of PBMT on LBP. Basford et al. (18) and Gur et al. (19) observed that PBMT appears to be effective in reducing pain and disability triggered by this disorder, while Konstantinovic et al. (20) and Vallone et al. (21) found that PBMT

1  
2  
3 combined with nonsteroidal anti-inflammatory drugs (NSAIDs) and exercise were efficient  
4 in reducing chronic LBP. In a recent systematic review with meta-analysis, Glazov et al. (37)  
5 found a clinically significant reduction in chronic LBP in patients treated with PBMT,  
6 although a reliable conclusion was hindered by the high heterogeneity in the parameters of  
7 therapy application.  
8  
9

10  
11 Therefore, in spite of the positive results obtained in the aforementioned studies in  
12 favor of PBMT, some factors warrant further investigation with high-quality studies on the  
13 effects of PBMT applied in isolation in LBP and the ideal parameters of application. Finally  
14 there is no placebo-controlled trial that investigated the true efficacy of PBMT in patients  
15 with LBP. In view of these issues, the objectives of this study are: 1) to evaluate the short-  
16 term effects of PBMT on pain intensity and disability (primary outcomes) in chronic non-  
17 specific LBP and 2) to evaluate the medium- and long-term effects of PBMT on pain  
18 intensity and general disability (primary outcomes) as well as the short-, medium-, and long-  
19 term effects on specific disability and global perceived effect (secondary outcomes) in  
20 patients with chronic nonspecific LBP.  
21  
22  
23  
24  
25  
26  
27  
28

## 29 **METHODS AND ANALYSES**

### 30 **Design**

31  
32  
33 A randomized, triple-blinded (patients, therapists, and outcome assessors), placebo-  
34 controlled trial will be performed. The protocol of this study has been prospectively  
35 registered on Clinicaltrials.gov (NCT03089424).  
36  
37  
38  
39  
40  
41  
42

### 43 **Location**

44  
45  
46 The study will be conducted at the Center for Excellence in Clinical Research in  
47 Physiotherapy of our institution.  
48  
49

### 50 **Eligibility criteria**

51  
52 The study assessors will determine whether or not patients will be eligible to  
53 participate in the study based on patient history and clinical examination.  
54  
55

56  
57 Inclusion criteria:  
58  
59  
60

- Patients with non-specific chronic LBP, defined as pain or discomfort between the costal margins and inferior gluteal folds with or without referred pain to the lower limbs;
- Persistent LBP for at least 3 months (38);
- Aged between 18 and 65 years;
- Both genders.

#### Exclusion criteria:

- Patients with severe skin diseases;
- Patients with LBP associated with nerve root compromise (measured by clinical examination of dermatomes, myotomes, and reflexes);
- Serious spinal pathologies such as fractures, tumors, inflammatory and infectious diseases;
- Decompensated heart disease or metabolic disorders;
- Previous spinal surgery;
- Pregnancy.

#### Interventions

For ethical reasons, on the first day of treatment, all groups will receive an information booklet on LBP called "The Back Book" (39) based on the recommendations of the European Guidelines (40, 41). The booklet can be accessed freely via internet and it has been translated into Portuguese by our research team. At each treatment session, patients will receive further explanations on the contents of the booklet. There is consistent evidence that *The Back Book* is useful for patients with LBP (42) and it has been used in clinical trials conducted by our research group (43, 44).

Patients will then be randomly allocated to two groups to be submitted to the following interventions:

1. Active PBMT Group: The PBMT will be performed using the Multi Radiance Medical™ Super Pulsed Laser MR4™ console (Solon, OH, USA), with the SE25 (emitter with an area of 4 cm<sup>2</sup>) and LaserShower (emitter with an area of 20 cm<sup>2</sup>) cluster probes as emitters. Nine sites will be irradiated on the patient's lumbar region: 3 central sites on top of the spinous processes (between T11 and T12, L2 and L3, L5 and S1), using the SE25 (3000 Hz of frequency, 3 minutes of irradiation per site, 24.75 J per site, a totalizing 74.25 J



1  
2  
3 irradiated from SE25); in the same direction, but laterally, 3 sites on the left and 3 on the  
4 right (on the paravertebral muscles), using the LaserShower (1000 Hz of frequency, 3  
5 minutes of irradiation per site, 24.30 J per site, a total of 145.80 J irradiated from  
6 LaserShower). Patients will be treated during 12 sessions over a period of four weeks (three  
7 sessions/week). At each treatment session, patients will receive a total dose of 220.05 J. At  
8 the end of the 12 treatments sessions, patients will receive a total dose of 2640.60 J.

9  
10  
11  
12  
13 The total treatment time will be 27 minutes per patient. This PBMT application  
14 protocol was based on the study of Leal Junior et al. (45). Figure 1 shows the PBMT  
15 irradiation sites.  
16  
17

18  
19  
20 << Figure 1 >>  
21  
22

23  
24 2. Placebo PBMT Group: The placebo PBMT will be performed using the Multi  
25 Radiance Medical™ Super Pulsed Laser MR4™ console (Solon, OH, USA), with the SE25  
26 (emitter with an area of 4 cm<sup>2</sup>) and LaserShower (emitter with an area of 20 cm<sup>2</sup>) cluster  
27 probes as emitters. Nine sites will be irradiated on the patient's lumbar region: 3 central sites  
28 on top of the spinous processes (between T11 and T12, L2 and L3, L5 and S1), using the  
29 SE25 (without any dose, 0 J); in the same direction, but laterally, 3 sites on the left and 3 on  
30 the right (on the paravertebral muscles), using the LaserShower (without any dose, 0 J).  
31 Patients will be treated during 12 sessions over a period of four weeks (three sessions/week).  
32 At each treatment session, patients will receive a total dose of 0 J. At the end of the 12  
33 treatments sessions, patients will receive a total dose of 0 J. The placebo mode simulates the  
34 pragmatism of clinical practice and increases the credibility of the use of the equipment in  
35 relation to the treated patients. The placebo technique has already been widely used in other  
36 studies with patients with LBP (44, 46-51), as well as in studies using PBMT (52-54).  
37  
38  
39  
40  
41  
42  
43  
44

45 Patients will undergo treatment (active PBMT or placebo), according to prior  
46 randomization, 3 times a week for 4 consecutive weeks, totaling 12 therapy sessions.  
47

48 The CONSORT flowchart summarizing experimental procedures and patients are  
49 shown in figure 2.  
50  
51

52  
53 << Figure 2 >>  
54  
55

## 56 Outcomes

57  
58  
59  
60

1  
2  
3  
4  
5  
6  
7  
8  
9  
10  
11  
12  
13  
14  
15  
16  
17  
18  
19  
20  
21  
22  
23  
24  
25  
26  
27  
28  
29  
30  
31  
32  
33  
34  
35  
36  
37  
38  
39  
40  
41  
42  
43  
44  
45  
46  
47  
48  
49  
50  
51  
52  
53  
54  
55  
56  
57  
58  
59  
60

Primary and secondary outcomes of the study will be obtained at baseline, at the end of treatment (4 weeks), and 3, 6, and 12 months after randomization. These outcomes will be collected by an assessor who will not be aware of patient allocation to their treatment groups.

The primary outcomes of the study will be:

- Pain intensity measured by the Pain Numerical Rating Scale (55). Pain Numerical Rating Scale evaluates pain intensity levels perceived by the patient on an 11-point scale ranging from 0 to 10, with 0 being "no pain" and 10 "the worst possible pain" (55). Patients will be instructed to score the level of pain intensity based on the last 7 days.
- Disability associated with LBP, as measured by the Roland-Morris Disability Questionnaire (56, 57). The questionnaire consists of 24 items that describe situations that patients may have difficulty performing on a daily basis due to LBP. The greater the number of affirmative answers is, the higher the level of functional disability associated with LBP (55, 57). Patients will be instructed to answer according to their condition on the day of administration of the questionnaire.

The secondary outcomes of the study will be:

- Specific disability, as measured by the Patient-Specific Functional Scale (55). The Patient-Specific Functional Scale is global and can be used for any part of the body. The measurement is done on an 11-point Likert scale for each activity, and the higher the average score is (ranging from 0 and 10 points), the better the patient's ability to perform the activities. The patients will be asked to identify up to three activities that they consider they are incapable of performing or that they have some difficulty performing (55, 58, 59).
- Global perceived effect as measured by the Global Perceived Effect Scale (55). Global Perceived Effect Scale is an 11-point Likert scale, ranging from -5 to +5, that compares the patient's current condition to the onset of symptoms (55). Positive scores represent improvement, while the negative scores represent worsening in relation to the onset of symptoms. Values closer to 5 mean greater intensity of this perception (55).

## Sample size

1  
2  
3 The sample calculation of the study was performed to detect a 1-point difference for  
4 the outcome pain intensity (as measured by the Pain Numerical Rating Scale) (55), with an  
5 estimated standard deviation of 1.84 points and 4 points for the outcome disability associated  
6 with LBP (measured by the Roland-Morris Disability Questionnaire) (56, 57), with an  
7 estimated standard deviation of 4.9 points. A statistical power of 80% was considered for the  
8 two outcomes, with  $\alpha$  of 5% and a possible sample loss of up to 15%. Therefore, a total of  
9 148 patients will be required for the study.  
10  
11  
12  
13

### 14 15 16 **Recruitment**

17  
18  
19 Patients seeking treatment for chronic LBP will be recruited at primary or secondary  
20 health services.  
21  
22

### 23 24 **Randomization**

25  
26  
27 Prior to initiation of treatment, patients will be randomized into their respective  
28 intervention groups. The randomization will be generated by a computer program (Excel  
29 Office 2010) and performed by a participating researcher not involved with the recruitment  
30 or evaluation of patients. This same researcher will be responsible for programming the  
31 PBMT device according to the result of the randomization. The PBMT device used in the  
32 present study will make the same sounds regardless of the programmed dose and mode  
33 (active PBMT or placebo PBMT). This researcher will be instructed not to disclose the  
34 programmed intervention to the therapist or any of the patients and other researchers  
35 involved in the study until its completion. Patient and therapist will be blinded throughout  
36 the treatment. Concealed allocation will be achieved through the use of sequentially  
37 numbered, sealed, and opaque envelopes.  
38  
39  
40  
41  
42  
43  
44  
45  
46  
47

### 48 **Data collection**

49  
50 The patients will be welcomed by the study's blinded assessor who will determine  
51 whether they will be eligible to participate in the study. Subsequently, a file will be  
52 completed with the patient's sociodemographic data and clinical history. Next, the primary  
53 outcomes and the secondary outcomes of the study will be collected. Then, all eligible  
54 patients will be randomized and allocated into two treatment groups: active PBMT or  
55 placebo PBMT. At the end of the 12 treatment sessions, the primary and secondary outcomes  
56  
57  
58  
59  
60

1  
2  
3 of the study participants will be reassessed by the same evaluator who performed the  
4 baseline assessment. The 3, 6, and 12-month follow-ups will be performed by telephone by  
5 the same evaluator who carried out the other evaluations.  
6  
7

### 8 9 **Statistical Analysis**

10  
11  
12 The statistical analysis will be conducted following the principles of intention-to-treat  
13 analysis (60). The normality of the data will be tested by visual inspection of histograms and  
14 the characterization of the participants will be calculated using descriptive statistical tests.  
15 The between-group differences (treatment effects) and their respective 95% confidence  
16 intervals will be calculated by using mixed linear models (61) using the group-by-time  
17 interaction terms. The analyses will be performed using SPSS version 19.  
18  
19  
20  
21  
22

### 23 24 **Ethics**

25  
26  
27 The present study was approved by the Research Ethics Committee of Universidade  
28 Cidade de São Paulo (UNICID) under number 1.964.094. All patients eligible for the study  
29 will be informed of the objectives and will be required to complete the Informed Consent  
30 Form, as determined by Brazilian National Health Council Resolution 196/96.  
31  
32  
33

### 34 35 **Dissemination**

36  
37  
38 The study will be disseminated through publication in peer-reviewed international  
39 journals, as well as presentations at national and international conferences.  
40  
41  
42

### 43 44 **Discussion**

45  
46  
47 Chronic LBP is a condition that is often associated with disability, emotional  
48 alterations, and absenteeism from work (8). Since chronic LBP is very prevalent (11), it has  
49 a great financial impact, generating high costs, both direct and indirect (62). This fact  
50 demonstrates the importance of the constant investigation of more suitable treatments for  
51 LBP, aiming at the well-being of the patient and the reduction of expenses for health  
52 systems.  
53  
54  
55  
56  
57  
58  
59  
60

1  
2  
3 PBMT is one of the interventions recommended for the treatment of chronic LBP  
4 (63), however, it is a relatively recent therapy given that the first clinical trial investigating  
5 its effects on LBP was published in 1999 (18). Since then, some studies have demonstrated  
6 the efficacy of PBMT in LBP (19-21). Nevertheless, there are still issues to be clarified  
7 about its efficacy, as there are no high-quality methodological studies that test PBMT versus  
8 placebo in LBP patients.  
9

10  
11  
12  
13 It is extremely important to carry out studies with high methodological quality aimed  
14 at contributing to a better understanding of the effects of PBMT on LBP. Only then will it be  
15 possible to determine whether PBMT can be used as one of the treatments of choice for LBP.  
16 If the effectiveness of PBMT in LBP is confirmed, it could be used as an alternative method  
17 to NSAIDs or opioids, for example, since it causes similar or superior effects to these drugs,  
18 shown in other chronic musculoskeletal disorders (64, 65), without the presence of known  
19 adverse effects at present. We believe that, by providing relevant and compelling  
20 information about PBMT, we will contribute to a safer and more effective clinical practice.  
21

22  
23  
24  
25  
26 The present study can be considered to have high methodological quality, since it is a  
27 randomized, controlled, and prospectively registered clinical trial. In addition, one of the  
28 strengths of the study is that it is triple-blind, i.e., evaluators, therapists, and patients will be  
29 blinded to interventions over the course of the study. Finally, the sample size was calculated  
30 to provide the appropriate statistical power to detect differences in the primary outcomes of  
31 the study. Thus, we believe that this study will contribute to the evidence-based practice of  
32 PBMT in patients with LBP.  
33  
34  
35  
36  
37  
38

### 39 **Conflict of interest**

40  
41 The authors declare no conflict of interest.  
42  
43  
44  
45  
46  
47  
48  
49  
50  
51  
52  
53  
54  
55  
56  
57  
58  
59  
60

**References:**

1. Tulder MV. Chapter 1. European guidelines. *Eur Spine J* 2006;15:134-35.
2. Academia Americana De Cirurgiões Ortopédicos (American Academy Of Orthopaedic Surgeons). *US Bone and Joint Decade - The Burden of Musculoskeletal Diseases in the United States*. Rosemont, IL, USA, 2008.
3. Dagenais S, Caro J, Haldeman SA. systematic review of low back pain cost of illness studies in the United States and internationally. *Spine J*. 2008;8:8-20.
4. Murray CJ, Lopez AD. Measuring the global burden of disease. *N Engl J Med*. 2013;369:448-457.
5. Hoy D, Bain C, Williams G, March L, Brooks P, Blyth F, et al. A systematic review of the global prevalence of low back pain. *Arthritis Rheum*. 2012;64:2028-37.
6. Henschke N, Maher CG, Refshauge KM, Herbert RD, Cumming RG, Bleasel J, et al. Prognosis in patients with recent onset low back pain in Australian primary care: inception cohort study. *BMJ*. 2008;337:a171.
7. Costa Lda C, Maher CG, Mcauley JH, Hancock MJ, Herbert RD, Refshauge KM, et al. Prognosis for patients with chronic low back pain: inception cohort study. *BMJ*. 2009;339:b3829.
8. Da C Menezes Costa L, Maher CG, Hancock MJ, Mcauley JH, Herbert RD, Costa LO. The prognosis of acute and persistent low-back pain: a meta-analysis. *CMAJ*. 2012;184:E613-624.
9. Beattie PF, Silfies SP, Jordon M. The evolving role of physical therapists in the long-term management of chronic low back pain: longitudinal care using assisted self-management strategies. *Braz J Phys Ther* 2016;20:580-91.
10. Medeiros FC, Costa LO, Added MA, Salomão EC, Costa LD. Serial Monitoring of Patients With Chronic Low Back Pain During Physical Therapy Treatment Using the STarT Back Screening Tool. *J Orthop Sports Phys Ther*. 2017;29:1-32. [Epub ahead of print]
11. Maher C, Underwood M, Buchbinder R. Non-specific low back pain. *Lancet*. 2017;389:736-47.
12. Bjordal JM, Ljunggren AE, Klovning A, Slørdal L. Non-steroidal anti-inflammatory drugs, including cyclo-oxygenase-2 inhibitors, in osteoarthritic knee pain: meta-analysis of randomised placebo controlled trials. *BMJ*. 2004;329:1317.
13. Chou R. Pharmacological management of low back pain. *Drugs*. 2010;70:387-402.
14. Dagenais S, Tricco AC, Haldeman S. Synthesis of recommendations for the assessment and management of low back pain from recent clinical practice guidelines. *Spine J*. 2010;10:514-29.

- 1  
2  
3 15. Van Middelkoop M, Rubinstein SM, Kuijpers T, Verhagen AP, Ostelo R, Koes BW, et  
4 al. A systematic review on the effectiveness of physical and rehabilitation interventions for  
5 chronic non-specific low back pain. *Eur Spine J.* 2011;20:19-39.  
6  
7 16. Bertagnoli R. Disc surgery in motion. *SpineLine.* 2004;5:23-28.  
8  
9 17. Sanders SH, Rucker KS, Anderson KO, Harden RN, Jackson KW, Vicente PJ, et al.  
10 Clinical practice guidelines for chronic non-malignant pain syndrome patients. *J Back*  
11 *Musculoskelet Rehabil.* 1995;5:115-20.  
12  
13 18. Basford JR, Sheffield CG, Harmsen WS. Laser therapy: a randomized, controlled trial of  
14 the effects of low-intensity Nd:YAG laser irradiation on musculoskeletal back pain. *Arch*  
15 *Phys Med Rehabil.* 1999;80:647-52.  
16  
17 19. Gur A, Karakoc M, Cevik R, Nas K, Sarac AJ, Karakoc M. Efficacy of low power laser  
18 therapy and exercise on pain and functions in chronic low back pain. *Lasers Surg Med.*  
19 2003;32:233-38.  
20  
21 20. Konstantinovic LM, Kanjuh ZM, Milovanovic AN, Cutovic MR, Djurovic AG, Savic  
22 VG, et al. Acute low back pain with radiculopathy: a double-blind, randomized, placebo-  
23 controlled study. *Photomed Laser Surg.* 2010;28:553-60.  
24  
25 21. Vallone F, Benedicenti S, Sorrenti E, Schiavetti I, Angiero F. Effect of diode laser in the  
26 treatment of patients with nonspecific chronic low back pain: a randomized controlled trial.  
27 *Photomed Laser Surg.* 2014;32:490-94.  
28  
29 22. Anders JJ, Lanzafame RJ, Arany PR. Low-level light/laser therapy versus  
30 photobiomodulation therapy. *Photomed Laser Surg.* 2015;33:183-184.  
31  
32 23. Walker BF. The prevalence of low back pain: a systematic review of the literature from  
33 1966 to 1998. *J Spinal Disord.* 2000;13:205-17.  
34  
35 24. Rochkind S, Nissan M, Alon M, Shamir M, Salame K. Effects of laser irradiation on the  
36 spinal cord for the regeneration of crushed peripheral nerve in rats. *Lasers Surg Med.*  
37 2001;28:216-19.  
38  
39 25. Ozdemir F, Birtane M, Kokino S. The clinical efficacy of low-power laser therapy on  
40 pain and function in cervical osteoarthritis. *Clin Rheumatol.* 2001;20:181-84.  
41  
42 26. Bjordal JM, Lopes-Martins RA, Iversen VV. A randomised, placebo controlled trial of  
43 low level laser therapy for activated Achilles tendinitis with microdialysis measurement of  
44 peritendinous prostaglandin E2 concentrations. *Br J Sports Med.* 2006;40:76-80.  
45  
46 27. Chow RT, Heller GZ, Barnsley L. The effect of 300 mW, 830 nm laser on chronic neck  
47 pain: a double-blind, randomized, placebo-controlled study. *Pain.* 2006;124:1-2.  
48  
49 28. Rochkind S, Leider-Trejo L, Nissan M, Shamir MH, Kharenko O, Alon M. Efficacy of  
50 780-nm laser phototherapy on peripheral nerve regeneration after neurotube reconstruction  
51 procedure (double-blind randomized study). *Photomed. Laser Surg.* 2007;25:137-43.  
52  
53  
54  
55  
56  
57  
58  
59  
60

- 1  
2  
3 29. Leal Junior EC, Lopes-Martins RA, Baroni BM, De Marchi T, Taufer D, Manfro DS, et  
4 al. Effect of 830 nm low-level laser therapy applied before high-intensity exercises on  
5 skeletal muscle recovery in athletes. *Lasers Med Sci.* 2009;24:857-63.  
6  
7  
8 30. Zivin JA, Albers GW, Bornstein N, Chippendale T, Dahlof B, Devlin T, et al.  
9 Effectiveness and safety of transcranial laser therapy for acute ischemic stroke. *Stroke.*  
10 2009;40:1359-64.  
11  
12 31. Tullberg M, Alstergren PJ, Ernberg MM. Effects of low-power laser exposure on  
13 masseter muscle pain and microcirculation. *Pain.* 2003;105:89-96.  
14  
15 32. Silveira PC, Silva LA, Fraga DB, Freitas TP, Streck EL, Pinho R. Evaluation of  
16 mitochondrial respiratory chain activity in muscle healing by low-level laser therapy. *J*  
17 *Photochem Photobiol B.* 2009;4:89-92  
18  
19 33. Albuquerque-Pontes GM, Vieira RP, Tomazoni SS, Caires CO, Nemeth V, Vanin AA, et  
20 al. Effect of pre-irradiation with different doses, wavelengths, and application intervals of  
21 low-level laser therapy on cytochrome c oxidase activity in intact skeletal muscle of rats.  
22 *Lasers Med Sci.* 2015;30:59-66.  
23  
24 34. Xu X, Zhao X, Liu TC, Pan H. Low-intensity laser irradiation improves the  
25 mitochondrial dysfunction of C2C12 induced by electrical stimulation. *Photomed Laser*  
26 *Surg.* 2008;26:197-202.  
27  
28 35. Avni D, Levkovitz S, Maltz L, Oron U. Protection of skeletal muscles from ischemic  
29 injury: low-level laser therapy increases antioxidant activity. *Photomed Laser Surg.*  
30 2005;23:273-277  
31  
32 36. Rizzi CF, Mauriz JL, Freitas Corrêa DS, Moreira AJ, Zettler CG, Filippin LI, et al.  
33 Effects of low-level laser therapy (LLLT) on the nuclear factor (NF)-kappaB signaling  
34 pathway in traumatized muscle. *Lasers Surg Med.* 2006;38:704-13.  
35  
36 37. Glazov G, Yelland M, Emery J. Low-level laser therapy for chronic non-specific low  
37 back pain: a meta-analysis of randomised controlled trials. *Acupunct Med.* 2016;34:328-341.  
38  
39 38. Airaksinen O, Brox JI, Cedraschi C, Hildebrandt J, Klüber-Moffett J, Kovacs F, et al.  
40 Chapter 4. European guidelines for the management of chronic nonspecific low back pain.  
41 *Eur Spine J.* 2006;15Suppl2:192-300.  
42  
43 39. Manchester MR, Glasgow GW, York JKM, Huddersfield KB, Salford CM, Southampton  
44 TC. The Back Book. Clinical Guidelines for the Management of Acute Low Back Pain.  
45 2002;1-28.  
46  
47 40. Van Tulder M, Becker A, Bekkering T, Breen A, Del Real MT, Hutchinson A, et al.  
48 Chapter 3. European guidelines for the management of acute nonspecific low back pain in  
49 primary care. *Eur Spine J.* 2006;15Suppl2:S169-191.  
50  
51 41. Delitto A, George SZ, Van Dillen LR, Whitman JM, Sowa G, Shekelle P, et al.  
52 Orthopaedic Section of the American Physical Therapy Association. Low back pain. *J*  
53 *Orthop Sports Phys Ther.* 2012;42: A1-57.  
54  
55  
56  
57  
58  
59  
60



- 1  
2  
3 42. Engers A, Jellema P, Wensing M, Van Der Windt DA, Grol R, Van Tulder MW.  
4 Individual patient education for low back pain. *Cochrane Database Syst Rev.*  
5 2008;23:CD004057.  
6  
7 43. Garcia AN, Costa L Da C, Hancock MJ, De Almeida MO, De Souza FS, Costa LO.  
8 Efficacy of the McKenzie method in patients with chronic nonspecific low back pain: a  
9 protocol of randomized placebo-controlled trial. *Phys Ther.* 2015;95:267-273.  
10  
11 44. Garcia AN, Hancock M, Costa LCM, De Souza, FS, Gomes, GVFO, Almeida, MO, et al.  
12 Efficacy of the mechanical diagnosis and therapy in patients with chronic nonspecific low  
13 back pain: a randomized placebo controlled trial. 2017; [in press]  
14  
15 45. Leal-Junior EC, Johnson DS, Saltmarche A, Demchak T. Adjunctive use of combination  
16 of super-pulsed laser and light-emitting diodes phototherapy on nonspecific knee pain:  
17 double-blinded randomized placebo-controlled trial. *Lasers Med Sci.* 2014;29:1839-47.  
18  
19 46. Costa LO, Maher CG, Latimer J, Hodges PW, Herbert RD, Refshauge KM.; et al. Motor  
20 control exercise for chronic low back pain: a randomized placebo-controlled trial. *Phys Ther.*  
21 2009;89:1275-86.  
22  
23 47. Kumar SP. Efficacy of segmental stabilization exercise for lumbar segmental instability  
24 in patients with mechanical low back pain: A randomized placebo controlled crossover  
25 study. *N Am J Med Sci.* 2011;3:456-461.  
26  
27 48. Ebadi S, Ansari NN, Naghdi S, Jalaei S, Sadat M, Bagheri H, et al. The effect of  
28 continuous ultrasound on chronic non-specific low back pain: a single blind placebo-  
29 controlled randomized trial. *BMC Musculoskelet Disord.* 2012;13:192.  
30  
31 49. Balthazard P, De Goumoens P, Rivier G, Demeulenaere P, Ballabeni P, Dériaz O.  
32 Manual therapy followed by specific active exercises versus a placebo followed by specific  
33 active exercises on the improvement of functional disability in patients with chronic non  
34 specific low back pain: a randomized controlled trial. *BMC Musculoskelet Disord.*  
35 2012;13:162.  
36  
37 50. Parreira Pdo C, Costa Lda C, Takahashi R, Hespanhol Junior LC, Luz Junior MA, Silva  
38 TM, Costa LO. Kinesio taping to generate skin convolutions is not better than sham taping  
39 for people with chronic non-specific low back pain: a randomised trial. *J Physiother.*  
40 2014;60:90-6.  
41  
42 51. Luz Júnior MA, Sousa MV, Neves LA, Cezar AA, Costa LO. Kinesio Taping® is not  
43 better than placebo in reducing pain and disability in patients with chronic non-specific low  
44 back pain: a randomized controlled trial. *Braz J Phys Ther.* 2015;19:482-90.  
45  
46 52. Antonialli FC, De Marchi T, Tomazoni SS, Vanin AA, Dos Santos Grandinetti V, De  
47 Paiva PR, et al. Phototherapy in skeletal muscle performance and recovery after exercise:  
48 effect of combination of super-pulsed laser and light-emitting diodes. *Lasers Med Sci.*  
49 2014;29:1967-76.  
50  
51 53. Grandinetti V Dos S, Miranda EF, Johnson DS, De Paiva PR, Tomazoni SS, Vanin AA,  
52 et al. The thermal impact of phototherapy with concurrent super-pulsed lasers and red and  
53  
54  
55  
56  
57  
58  
59  
60

1  
2  
3 infrared LEDs on human skin. *Lasers Med Sci.* 2015;30:1575-81.

4  
5 54. Miranda EF, De Oliveira LV, Antonialli FC, Vanin AA, De Carvalho PdeT, Leal-Junior  
6 EC. Phototherapy with combination of super-pulsed laser and light-emitting diodes is  
7 beneficial in improvement of muscular performance (strength and muscular endurance),  
8 dyspnea, and fatigue sensation in patients with chronic obstructive pulmonary disease.  
9 *Lasers Med Sci.* 2015;30:437-43.

10  
11 55. Costa LO, Maher CG, Latimer J, Ferreira PH, Ferreira ML, Pozzi GC, et al. Clinimetric  
12 testing of three self-report outcome measures for low back pain patients in Brazil: which one  
13 is the best? *Spine (Phila Pa 1976).* 2008;33:2459-63.

14  
15 56. Nusbaum L, Natour J, Ferraz MB, Goldenberg J. Translation, adaptation and validation  
16 of the Roland-Morris questionnaire--Brazil Roland-Morris. *Braz J Med Biol Res.*  
17 2001;34:203-210.

18  
19 57. Costa LO, Maher CG, Latimer J, Ferreira PH, Pozzi GC, Ribeiro RN. Psychometric  
20 characteristics of the Brazilian-Portuguese versions of the Functional Rating Index and the  
21 Roland Morris Disability Questionnaire. *Spine (Phila Pa 1976).* 2007;32:1902-07.

22  
23 58. Chatman AB, Hyams SP, Neel JM, Binkley JM, Stratford PW, Schomberg A, et al. The  
24 Patient-Specific Functional Scale: measurement properties in patients with knee dysfunction.  
25 *Phys Ther.* 1997;77:820-29.

26  
27 59. Pengel LH, Refshauge KM, Maher CG. Responsiveness of pain, disability, and physical  
28 impairment outcomes in patients with low back pain. *Spine (Phila Pa 1976).* 2004;29:879-83.

29  
30 60. Elkins MR, Moseley AM. Intention-to-treat analysis. *J Physiother.* 2015;61:165-67.

31  
32 61. Twisk JWR. *Applied Longitudinal Data Analysis for Epidemiology: A Practical Guide*  
33 ISBN: 0521819768, 9780511061608; 2003.

34  
35 62. Walker BF, Muller R, Grant WD. Low back pain in Australia adults: the economic  
36 burden. *Asia Pac J Public Health.* 2003;15:79-87.

37  
38 63. Qaseem A, Wilt TJ, Mclean RM, Forciea MA. Clinical Guidelines Committee of the  
39 American College of Physicians. Noninvasive Treatments for Acute, Subacute, and Chronic  
40 Low Back Pain: A Clinical Practice Guideline From the American College of Physicians.  
41 *Ann Intern Med.* 2017;166:514-30.

42  
43 64. Tomazoni SS, Leal-Junior EC, Frigo L, Pallotta RC, Teixeira S, de Almeida P, et al.  
44 Isolated and combined effects of photobiomodulation therapy, topical nonsteroidal anti-  
45 inflammatory drugs, and physical activity in the treatment of osteoarthritis induced by  
46 papain. *J Biomed Opt.* 2016;21:108001.

47  
48 65. Tomazoni SS, Leal-Junior EC, Pallotta RC, Teixeira S, De Almeida P, Lopes-Martins  
49 R.Á. Effects of photobiomodulation therapy, pharmacological therapy, and physical exercise  
50 as single and/or combined treatment on the inflammatory response induced by experimental  
51 osteoarthritis. *Lasers Med Sci.* 2017;32:101-108.

1  
2  
3  
4  
5  
6  
7  
8  
9  
10  
11  
12  
13  
14  
15  
16  
17  
18  
19  
20  
21  
22  
23  
24  
25  
26  
27  
28  
29  
30  
31  
32  
33  
34  
35  
36  
37  
38  
39  
40  
41  
42  
43  
44  
45  
46  
47  
48  
49  
50  
51  
52  
53  
54  
55  
56  
57  
58  
59  
60

**FIGURE LEGENDS**

Figure 1. PBMT irradiation sites.

Figure 2. Flow diagram of the study.

For peer review only

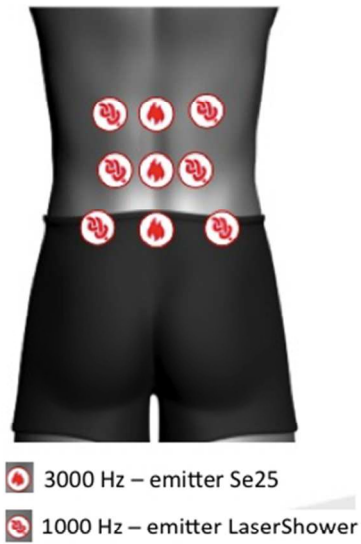

Figure 1. PBMT irradiation sites.

254x190mm (72 x 72 DPI)

ew only

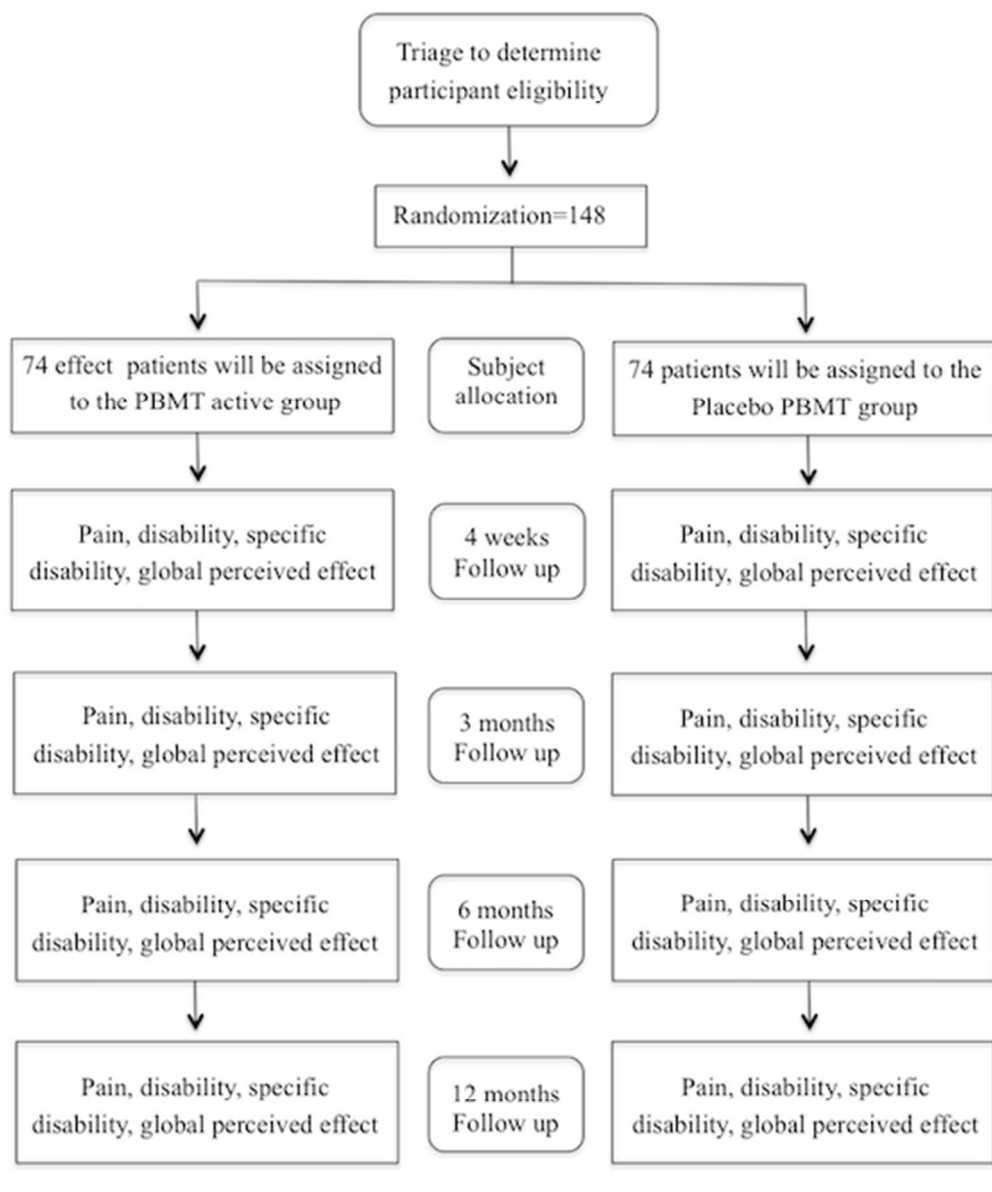

Figure 2. Flow diagram of the study.

197x235mm (72 x 72 DPI)

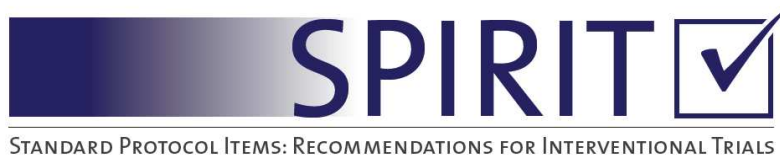

SPIRIT 2013 Checklist: Recommended items to address in a clinical trial protocol and related documents\*

| Section/item                      | Item No | Description                                                                                                                                                                                                                                                                              | Page Number |
|-----------------------------------|---------|------------------------------------------------------------------------------------------------------------------------------------------------------------------------------------------------------------------------------------------------------------------------------------------|-------------|
| <b>Administrative information</b> |         |                                                                                                                                                                                                                                                                                          |             |
| Title                             | 1       | Descriptive title identifying the study design, population, interventions, and, if applicable, trial acronym                                                                                                                                                                             | 1           |
| Trial registration                | 2a      | Trial identifier and registry name. If not yet registered, name of intended registry                                                                                                                                                                                                     | 1           |
|                                   | 2b      | All items from the World Health Organization Trial Registration Data Set                                                                                                                                                                                                                 | 1           |
| Protocol version                  | 3       | Date and version identifier                                                                                                                                                                                                                                                              | 1           |
| Funding                           | 4       | Sources and types of financial, material, and other support                                                                                                                                                                                                                              | 1           |
| Roles and responsibilities        | 5a      | Names, affiliations, and roles of protocol contributors                                                                                                                                                                                                                                  | 1           |
|                                   | 5b      | Name and contact information for the trial sponsor                                                                                                                                                                                                                                       | 1           |
|                                   | 5c      | Role of study sponsor and funders, if any, in study design; collection, management, analysis, and interpretation of data; writing of the report; and the decision to submit the report for publication, including whether they will have ultimate authority over any of these activities | 1           |
|                                   | 5d      | Composition, roles, and responsibilities of the coordinating centre, steering committee, endpoint adjudication committee, data management team, and other individuals or groups overseeing the trial, if applicable (see Item 21a for data monitoring committee)                         | 1           |
| <b>Introduction</b>               |         |                                                                                                                                                                                                                                                                                          |             |
| Background and rationale          | 6a      | Description of research question and justification for undertaking the trial, including summary of relevant studies (published and unpublished) examining benefits and harms for each intervention                                                                                       | 4           |
|                                   | 6b      | Explanation for choice of comparators                                                                                                                                                                                                                                                    | 7           |
| Objectives                        | 7       | Specific objectives or hypotheses                                                                                                                                                                                                                                                        | 5           |
| Trial design                      | 8       | Description of trial design including type of trial (eg, parallel group, crossover, factorial, single group), allocation ratio, and framework (eg, superiority, equivalence, noninferiority, exploratory)                                                                                | 5           |

**Methods: Participants, interventions, and outcomes**

|                      |     |                                                                                                                                                                                                                                                                                                                                                                                |      |
|----------------------|-----|--------------------------------------------------------------------------------------------------------------------------------------------------------------------------------------------------------------------------------------------------------------------------------------------------------------------------------------------------------------------------------|------|
| Study setting        | 9   | Description of study settings (eg, community clinic, academic hospital) and list of countries where data will be collected. Reference to where list of study sites can be obtained                                                                                                                                                                                             | 5    |
| Eligibility criteria | 10  | Inclusion and exclusion criteria for participants. If applicable, eligibility criteria for study centres and individuals who will perform the interventions (eg, surgeons, psychotherapists)                                                                                                                                                                                   | 5, 6 |
| Interventions        | 11a | Interventions for each group with sufficient detail to allow replication, including how and when they will be administered                                                                                                                                                                                                                                                     | 6, 7 |
|                      | 11b | Criteria for discontinuing or modifying allocated interventions for a given trial participant (eg, drug dose change in response to harms, participant request, or improving/worsening disease)                                                                                                                                                                                 | 6, 7 |
|                      | 11c | Strategies to improve adherence to intervention protocols, and any procedures for monitoring adherence (eg, drug tablet return, laboratory tests)                                                                                                                                                                                                                              | 6, 7 |
|                      | 11d | Relevant concomitant care and interventions that are permitted or prohibited during the trial                                                                                                                                                                                                                                                                                  | 6, 7 |
| Outcomes             | 12  | Primary, secondary, and other outcomes, including the specific measurement variable (eg, systolic blood pressure), analysis metric (eg, change from baseline, final value, time to event), method of aggregation (eg, median, proportion), and time point for each outcome. Explanation of the clinical relevance of chosen efficacy and harm outcomes is strongly recommended | 7, 8 |
| Participant timeline | 13  | Time schedule of enrolment, interventions (including any run-ins and washouts), assessments, and visits for participants. A schematic diagram is highly recommended (see Figure)                                                                                                                                                                                               | 9    |
| Sample size          | 14  | Estimated number of participants needed to achieve study objectives and how it was determined, including clinical and statistical assumptions supporting any sample size calculations                                                                                                                                                                                          | 8, 9 |
| Recruitment          | 15  | Strategies for achieving adequate participant enrolment to reach target sample size                                                                                                                                                                                                                                                                                            | 9    |

**Methods: Assignment of interventions (for controlled trials)**

## Allocation:

|                     |     |                                                                                                                                                                                                                                                                                                                                                          |   |
|---------------------|-----|----------------------------------------------------------------------------------------------------------------------------------------------------------------------------------------------------------------------------------------------------------------------------------------------------------------------------------------------------------|---|
| Sequence generation | 16a | Method of generating the allocation sequence (eg, computer-generated random numbers), and list of any factors for stratification. To reduce predictability of a random sequence, details of any planned restriction (eg, blocking) should be provided in a separate document that is unavailable to those who enrol participants or assign interventions | 9 |
|---------------------|-----|----------------------------------------------------------------------------------------------------------------------------------------------------------------------------------------------------------------------------------------------------------------------------------------------------------------------------------------------------------|---|

|    |                |     |                                                                           |   |
|----|----------------|-----|---------------------------------------------------------------------------|---|
| 1  |                |     |                                                                           |   |
| 2  | Allocation     | 16b | Mechanism of implementing the allocation sequence (eg, central            | 9 |
| 3  | concealment    |     | telephone; sequentially numbered, opaque, sealed envelopes),              |   |
| 4  | mechanism      |     | describing any steps to conceal the sequence until interventions are      |   |
| 5  |                |     | assigned                                                                  |   |
| 6  |                |     |                                                                           |   |
| 7  | Implementation | 16c | Who will generate the allocation sequence, who will enrol participants,   | 9 |
| 8  |                |     | and who will assign participants to interventions                         |   |
| 9  |                |     |                                                                           |   |
| 10 | Blinding       | 17a | Who will be blinded after assignment to interventions (eg, trial          | 9 |
| 11 | (masking)      |     | participants, care providers, outcome assessors, data analysts), and      |   |
| 12 |                |     | how                                                                       |   |
| 13 |                |     |                                                                           |   |
| 14 |                | 17b | If blinded, circumstances under which unblinding is permissible, and      | 9 |
| 15 |                |     | procedure for revealing a participant's allocated intervention during the |   |
| 16 |                |     | trial                                                                     |   |
| 17 |                |     |                                                                           |   |
| 18 |                |     |                                                                           |   |

### 19 **Methods: Data collection, management, and analysis**

|    |                 |     |                                                                            |    |
|----|-----------------|-----|----------------------------------------------------------------------------|----|
| 20 |                 |     |                                                                            |    |
| 21 | Data collection | 18a | Plans for assessment and collection of outcome, baseline, and other        | 8  |
| 22 | methods         |     | trial data, including any related processes to promote data quality (eg,   |    |
| 23 |                 |     | duplicate measurements, training of assessors) and a description of        |    |
| 24 |                 |     | study instruments (eg, questionnaires, laboratory tests) along with their  |    |
| 25 |                 |     | reliability and validity, if known. Reference to where data collection     |    |
| 26 |                 |     | forms can be found, if not in the protocol                                 |    |
| 27 |                 |     |                                                                            |    |
| 28 |                 | 18b | Plans to promote participant retention and complete follow-up, including   | 9  |
| 29 |                 |     | list of any outcome data to be collected for participants who discontinue  |    |
| 30 |                 |     | or deviate from intervention protocols                                     |    |
| 31 |                 |     |                                                                            |    |
| 32 |                 |     |                                                                            |    |
| 33 | Data            | 19  | Plans for data entry, coding, security, and storage, including any related | 9  |
| 34 | management      |     | processes to promote data quality (eg, double data entry; range checks     |    |
| 35 |                 |     | for data values). Reference to where details of data management            |    |
| 36 |                 |     | procedures can be found, if not in the protocol                            |    |
| 37 |                 |     |                                                                            |    |
| 38 | Statistical     | 20a | Statistical methods for analysing primary and secondary outcomes.          | 10 |
| 39 | methods         |     | Reference to where other details of the statistical analysis plan can be   |    |
| 40 |                 |     | found, if not in the protocol                                              |    |
| 41 |                 |     |                                                                            |    |
| 42 |                 | 20b | Methods for any additional analyses (eg, subgroup and adjusted             | 10 |
| 43 |                 |     | analyses)                                                                  |    |
| 44 |                 |     |                                                                            |    |
| 45 |                 | 20c | Definition of analysis population relating to protocol non-adherence (eg,  | 10 |
| 46 |                 |     | as randomised analysis), and any statistical methods to handle missing     |    |
| 47 |                 |     | data (eg, multiple imputation)                                             |    |
| 48 |                 |     |                                                                            |    |
| 49 |                 |     |                                                                            |    |

### 50 **Methods: Monitoring**

|    |                 |     |                                                                           |   |
|----|-----------------|-----|---------------------------------------------------------------------------|---|
| 51 |                 |     |                                                                           |   |
| 52 | Data monitoring | 21a | Composition of data monitoring committee (DMC); summary of its role       | - |
| 53 |                 |     | and reporting structure; statement of whether it is independent from the  |   |
| 54 |                 |     | sponsor and competing interests; and reference to where further details   |   |
| 55 |                 |     | about its charter can be found, if not in the protocol. Alternatively, an |   |
| 56 |                 |     | explanation of why a DMC is not needed                                    |   |
| 57 |                 |     |                                                                           |   |
| 58 |                 |     |                                                                           |   |
| 59 |                 |     |                                                                           |   |
| 60 |                 |     |                                                                           |   |



|    |                                 |     |                                                                              |    |
|----|---------------------------------|-----|------------------------------------------------------------------------------|----|
| 1  |                                 | 21b | Description of any interim analyses and stopping guidelines, including       | -  |
| 2  |                                 |     | who will have access to these interim results and make the final             |    |
| 3  |                                 |     | decision to terminate the trial                                              |    |
| 4  |                                 |     |                                                                              |    |
| 5  |                                 |     |                                                                              |    |
| 6  | Harms                           | 22  | Plans for collecting, assessing, reporting, and managing solicited and       | -  |
| 7  |                                 |     | spontaneously reported adverse events and other unintended effects of        |    |
| 8  |                                 |     | trial interventions or trial conduct                                         |    |
| 9  |                                 |     |                                                                              |    |
| 10 | Auditing                        | 23  | Frequency and procedures for auditing trial conduct, if any, and             | -  |
| 11 |                                 |     | whether the process will be independent from investigators and the           |    |
| 12 |                                 |     | sponsor                                                                      |    |
| 13 |                                 |     |                                                                              |    |
| 14 |                                 |     |                                                                              |    |
| 15 | <b>Ethics and dissemination</b> |     |                                                                              |    |
| 16 |                                 |     |                                                                              |    |
| 17 | Research ethics approval        | 24  | Plans for seeking research ethics committee/institutional review board       | 10 |
| 18 |                                 |     | (REC/IRB) approval                                                           |    |
| 19 |                                 |     |                                                                              |    |
| 20 | Protocol amendments             | 25  | Plans for communicating important protocol modifications (eg, changes        | -  |
| 21 |                                 |     | to eligibility criteria, outcomes, analyses) to relevant parties (eg,        |    |
| 22 |                                 |     | investigators, REC/IRBs, trial participants, trial registries, journals,     |    |
| 23 |                                 |     | regulators)                                                                  |    |
| 24 |                                 |     |                                                                              |    |
| 25 | Consent or assent               | 26a | Who will obtain informed consent or assent from potential trial              | 10 |
| 26 |                                 |     | participants or authorised surrogates, and how (see Item 32)                 |    |
| 27 |                                 |     |                                                                              |    |
| 28 |                                 | 26b | Additional consent provisions for collection and use of participant data     | -  |
| 29 |                                 |     | and biological specimens in ancillary studies, if applicable                 |    |
| 30 |                                 |     |                                                                              |    |
| 31 | Confidentiality                 | 27  | How personal information about potential and enrolled participants will      | 10 |
| 32 |                                 |     | be collected, shared, and maintained in order to protect confidentiality     |    |
| 33 |                                 |     | before, during, and after the trial                                          |    |
| 34 |                                 |     |                                                                              |    |
| 35 |                                 |     |                                                                              |    |
| 36 | Declaration of interests        | 28  | Financial and other competing interests for principal investigators for      | 1  |
| 37 |                                 |     | the overall trial and each study site                                        |    |
| 38 |                                 |     |                                                                              |    |
| 39 | Access to data                  | 29  | Statement of who will have access to the final trial dataset, and            | 10 |
| 40 |                                 |     | disclosure of contractual agreements that limit such access for              |    |
| 41 |                                 |     | investigators                                                                |    |
| 42 |                                 |     |                                                                              |    |
| 43 | Ancillary and post-trial care   | 30  | Provisions, if any, for ancillary and post-trial care, and for compensation  | -  |
| 44 |                                 |     | to those who suffer harm from trial participation                            |    |
| 45 |                                 |     |                                                                              |    |
| 46 | Dissemination policy            | 31a | Plans for investigators and sponsor to communicate trial results to          | 10 |
| 47 |                                 |     | participants, healthcare professionals, the public, and other relevant       |    |
| 48 |                                 |     | groups (eg, via publication, reporting in results databases, or other data   |    |
| 49 |                                 |     | sharing arrangements), including any publication restrictions                |    |
| 50 |                                 |     |                                                                              |    |
| 51 |                                 |     |                                                                              |    |
| 52 |                                 | 31b | Authorship eligibility guidelines and any intended use of professional       | -  |
| 53 |                                 |     | writers                                                                      |    |
| 54 |                                 |     |                                                                              |    |
| 55 |                                 | 31c | Plans, if any, for granting public access to the full protocol, participant- | 10 |
| 56 |                                 |     | level dataset, and statistical code                                          |    |
| 57 |                                 |     |                                                                              |    |
| 58 |                                 |     |                                                                              |    |
| 59 |                                 |     |                                                                              |    |
| 60 |                                 |     |                                                                              |    |

**Appendices**

|                            |    |                                                                                                                                                                                                |
|----------------------------|----|------------------------------------------------------------------------------------------------------------------------------------------------------------------------------------------------|
| Informed consent materials | 32 | Model consent form and other related documentation given to participants and authorised surrogates                                                                                             |
| Biological specimens       | 33 | Plans for collection, laboratory evaluation, and storage of biological specimens for genetic or molecular analysis in the current trial and for future use in ancillary studies, if applicable |

---

\*It is strongly recommended that this checklist be read in conjunction with the SPIRIT 2013 Explanation & Elaboration for important clarification on the items. Amendments to the protocol should be tracked and dated. The SPIRIT checklist is copyrighted by the SPIRIT Group under the Creative Commons "[Attribution-NonCommercial-NoDerivs 3.0 Unported](#)" license.

# BMJ Open

## Effects of photobiomodulation therapy in patients with chronic non-specific low back pain: protocol for a randomized placebo-controlled trial

|                                 |                                                                                                                                                                                                                                                                                                                                                                                                                                                                                                                                                                                                                                                                                                                                                                                                                                                                  |
|---------------------------------|------------------------------------------------------------------------------------------------------------------------------------------------------------------------------------------------------------------------------------------------------------------------------------------------------------------------------------------------------------------------------------------------------------------------------------------------------------------------------------------------------------------------------------------------------------------------------------------------------------------------------------------------------------------------------------------------------------------------------------------------------------------------------------------------------------------------------------------------------------------|
| Journal:                        | <i>BMJ Open</i>                                                                                                                                                                                                                                                                                                                                                                                                                                                                                                                                                                                                                                                                                                                                                                                                                                                  |
| Manuscript ID                   | bmjopen-2017-017202.R1                                                                                                                                                                                                                                                                                                                                                                                                                                                                                                                                                                                                                                                                                                                                                                                                                                           |
| Article Type:                   | Protocol                                                                                                                                                                                                                                                                                                                                                                                                                                                                                                                                                                                                                                                                                                                                                                                                                                                         |
| Date Submitted by the Author:   | 15-Jun-2017                                                                                                                                                                                                                                                                                                                                                                                                                                                                                                                                                                                                                                                                                                                                                                                                                                                      |
| Complete List of Authors:       | Tomazoni, Shaiane; Universidade Cidade de Sao Paulo, Masters and Doctoral Programs in Physical Therapy<br>Costa, Lucíola; Universidade Cidade de Sao Paulo, Masters and Doctoral Programs in Physical Therapy<br>Guimarães, Layana; Universidade Cidade de Sao Paulo, Masters and Doctoral Programs in Physical Therapy<br>Araujo, Amanda; Universidade Cidade de Sao Paulo, Masters and Doctoral Programs in Physical Therapy<br>Nascimento, Dafne; Universidade Cidade de Sao Paulo, Masters and Doctoral Programs in Physical Therapy<br>Medeiros, Flavia; Universidade Cidade de Sao Paulo, Masters and Doctoral Programs in Physical Therapy<br>Avanzi, Marina; Universidade Cidade de Sao Paulo, Masters and Doctoral Programs in Physical Therapy<br>Costa, Leonardo; Universidade Cidade de Sao Paulo, Masters and Doctoral Programs in Physical Therapy |
| <b>Primary Subject Heading</b>: | Evidence based practice                                                                                                                                                                                                                                                                                                                                                                                                                                                                                                                                                                                                                                                                                                                                                                                                                                          |
| Secondary Subject Heading:      | Rehabilitation medicine                                                                                                                                                                                                                                                                                                                                                                                                                                                                                                                                                                                                                                                                                                                                                                                                                                          |
| Keywords:                       | chronic low back pain, photobiomodulation therapy, low-level laser therapy, LLLT, PBMT                                                                                                                                                                                                                                                                                                                                                                                                                                                                                                                                                                                                                                                                                                                                                                           |
|                                 |                                                                                                                                                                                                                                                                                                                                                                                                                                                                                                                                                                                                                                                                                                                                                                                                                                                                  |

SCHOLARONE™  
Manuscripts

1  
2  
3 **Effects of photobiomodulation therapy in patients with chronic non-specific low back**  
4 **pain: protocol for a randomized placebo-controlled trial**  
5  
6  
7

8 Shaiane Silva Tomazoni<sup>1\*</sup>, Lucíola da Cunha Menezes Costa<sup>1</sup>, Layana de Souza Guimarães<sup>1</sup>,  
9 Amanda Costa Araujo<sup>1</sup>, Dafne Port Nascimento<sup>1</sup>, Flávia Cordeiro Medeiros<sup>1</sup>, Marina  
10 Athayde Avanzi<sup>1</sup> and Leonardo Oliveira Pena Costa<sup>1</sup>  
11  
12  
13

14 1. Masters and Doctoral Programs in Physical Therapy, Universidade Cidade de São Paulo,  
15 Brazil.  
16  
17

18  
19  
20 **Trial registration number:** NCT03089424  
21

22  
23 **Funding statement:** This work was supported by FAPESP (postdoctoral scholarship of  
24 Shaiane Silva Tomazoni) grant number 2016/10265-0.  
25  
26

27  
28 **\*Author for correspondence:** Shaiane Silva Tomazoni  
29 Universidade Cidade de São Paulo. Rua Cesário Galeno, 448/475  
30 Tatuapé, São Paulo, SP, Brazil, 05508-900.  
31 e-mail: shaiane.tomazoni@gmail.com  
32  
33  
34

35  
36 **Number of figures and tables:** 2 figures and 1 table.  
37  
38

39 **Conflict of interest:** the authors declare no conflict of interest.  
40  
41  
42  
43  
44  
45  
46  
47  
48  
49  
50  
51  
52  
53  
54  
55  
56  
57  
58  
59  
60

## ABSTRACT

**Introduction:** Low back pain (LBP) is one of the largest and most frequent public health problems worldwide. Photobiomodulation therapy (PBMT) is a frequently used non-pharmacological therapy for the treatment of musculoskeletal disorders. However, there is little high-quality scientific evidence that demonstrates the effectiveness of PBMT in the treatment of patients with chronic LBP in the short, medium, and long term. Therefore, the objective of this clinical trial is to evaluate the effects of PBMT in patients with chronic non-specific LBP in the short, medium, and long term. **Methods and analyses:** This is a prospectively registered, two-arm randomized placebo-controlled trial with blinded patients, assessors and treatment providers. One hundred and forty-eight patients with chronic non-specific LBP will be recruited. Treatment sessions will be provided 3 times a week for 4 weeks (totaling 12 sessions) with patients receiving either placebo or active PBMT. For ethical reasons, all patients, regardless of treatment allocation, will also receive an information booklet based on "The Back Book". Clinical outcomes will be measured at baseline, at the end of treatment, as well as 3, 6, and 12 months after randomization. The primary outcomes will be pain intensity and disability measured after 12 sessions of treatment. The secondary outcomes will be pain intensity and disability measured at 3, 6, and 12 months after randomization, in addition to specific disability and global perceived effect in all time points. **Ethics and dissemination:** The study was approved by the Research Ethics Committee of Universidade Cidade de São Paulo. The results will be disseminated through scientific publications and presentations at national and international scientific meetings. Clinical trial registration number: NCT03089424 (clinicaltrials.gov).

**Key-words:** chronic low back pain, photobiomodulation therapy, low-level laser therapy, LLLT, PBMT.

### Strengths and limitations of this study:

- The present study can be considered to have high methodological quality, since it is a randomized, controlled, and prospectively registered clinical trial.
- One of the strengths of the study is that it is triple-blinded, i.e., outcome assessors, therapists, and patients will be blinded to interventions over the course of the study.
- The sample size was calculated to provide the appropriate statistical power to detect precise differences for the primary outcomes of the study.

- 1  
2  
3 - In our study, we will test the effects of a single dose of PBMT (i.e 24 Joules). PBMT  
4 is known to present a biphasic dose-response pattern, i.e., within a therapeutic  
5 window (dosage range) the effects of biostimulation can be observed. However, if  
6 dosages below or above this window are used, these effects may not be observed.  
7  
8 Therefore, the application of only one dose of PBMT may be considered a limitation  
9 of this trial. However, in order to minimize this limitation, we based the choice of our  
10 parameters using the best evidence available.  
11  
12  
13  
14  
15  
16  
17  
18  
19  
20  
21  
22  
23  
24  
25  
26  
27  
28  
29  
30  
31  
32  
33  
34  
35  
36  
37  
38  
39  
40  
41  
42  
43  
44  
45  
46  
47  
48  
49  
50  
51  
52  
53  
54  
55  
56  
57  
58  
59  
60

## INTRODUCTION

Low back pain (LBP) is ranked as one of the most prevalent health problems and is highly associated with disability worldwide (1-4). It is estimated that about 12% of the world's population suffers from LBP (5). Furthermore, LBP generates high levels of work absenteeism and excessive costs to health systems (1, 2). The prognosis of LBP is directly related to the duration of symptoms, with less favorable prognoses in patients with chronic LBP (i.e. with a duration of symptoms longer than three months) (6-10). Therefore, the ideal treatment for chronic LBP represents a significant challenge, since there are no treatments that cure persistent LBP. However, several interventions provide low to moderate effects in reducing pain and disability on this population (11). The existing treatments for LBP can be divided into three categories: 1) pharmacological therapies, which trigger several adverse effects with prolonged use (12-14); 2) non-pharmacological therapies, which minimize undesirable effects and are moderately effective in LBP (15); and surgery, used only when conservative treatment is not efficacious (16). Several therapies can be used to treat LBP by controlling symptoms, minimizing disability, and improving the patients' quality of life (17).

Photobiomodulation therapy (PBMT) is a non-pharmacological intervention often used in the treatment of musculoskeletal disorders such as LBP (18-21). PBMT consists in applying a non-ionized form of light, which includes laser (light amplification by stimulated emission of radiation), LED (light-emitting diodes), and other lights with a broader spectrum ranging from visible to infrared (22). Recent evidence (23-28) suggests that PBMT triggers positive physiological effects, such as increased microcirculation (23), increased ATP synthesis (24, 25) stimulation of the mitochondrial respiratory chain (24, 25), stimulation of mitochondrial function (26), and factors that may influence the metabolism of various pathologies. In addition, there is evidence that PBMT reduces the release of both reactive oxygen species (ROS) and creatine kinase (CK) activity and also increases the production of antioxidants and heat shock proteins (27, 28).

As TFBM has been successfully proved as an effective intervention for neck pain patients (29); it is likely that TFBM could also be a reasonable option for patients with LBP. A range of previous trial have shown the effects of PBMT on acute, subacute and chronic LBP. Basford et al. (18) and Gur et al. (19) observed that PBMT appears to be effective in reducing pain and disability triggered by subacute and chronic LBP respectively. While Konstantinovic et al. (20) and Vallone et al. (21) found that PBMT combined with nonsteroidal anti-inflammatory drugs (NSAIDs) and exercise were efficient in reducing pain

1  
2  
3 intensity in patients with acute and chronic LBP respectively. In a recent systematic review,  
4 Glazov et al. (30) found a clinically significant reduction in pain intensity in chronic LBP in  
5 patients treated with PBMT, although a reliable conclusion was hindered by the high  
6 heterogeneity in the parameters of therapy application. Furthermore, a recent clinical practice  
7 guidelines (31) recommended the use of the PBMT as a possible nonpharmacological  
8 treatment for chronic LBP. On the other hand, another trial (32) did not detected differences  
9 between PBMT and placebo treatments on pain and disability in mixed sample of patients  
10 with acute and chronic LBP associated with lumbar disk degeneration. These findings show  
11 that there are still conflicts in the literature about PBMT in LBP. Therefore, high quality and  
12 adequately powered trials are strongly needed.

13  
14  
15  
16  
17  
18  
19  
20 Therefore, in spite of the positive results obtained in the aforementioned studies in  
21 favor of PBMT, some factors warrant further investigation with high-quality studies on the  
22 effects of PBMT applied in isolation in chronic non-specific LBP. Hence, it is necessary to  
23 conduct a high quality, adequately powered, randomized placebo-controlled trial with  
24 outcomes been measured at medium-and long-terms. Therefore, the objective of this study is  
25 to evaluate the effects of PBMT against placebo in patients with chronic non-specific LBP in  
26 the short, medium, and long term for the outcomes of pain intensity, general and specific  
27 disability and global perceived effect.

## 33 34 35 **METHODS AND ANALYSES**

### 36 37 38 **Design**

39  
40  
41 A randomized, triple-blinded (patients, therapists, and outcome assessors), placebo-  
42 controlled trial will be performed. The protocol of this study has been prospectively  
43 registered on Clinicaltrials.gov (NCT03089424).

### 44 45 46 47 48 **Location**

49  
50  
51 The study will be conducted at the Center for Excellence in Clinical Research in  
52 Physiotherapy of Universidade Cidade de São Paulo, Brazil.

### 53 54 55 56 57 **Eligibility criteria**



1  
2  
3 The study assessors will determine whether or not patients will be eligible to  
4 participate in the study based on patient history and clinical examination.

5  
6 Inclusion criteria:

- 7  
8 - Patients with non-specific chronic LBP, defined as pain or discomfort between the  
9 costal margins and inferior gluteal folds with or without referred pain to the lower  
10 limbs;  
11  
12 - Persistent LBP for at least 3 months (33);  
13  
14 - Aged between 18 and 65 years;  
15  
16 - Both genders.

17  
18 Exclusion criteria:

- 19  
20 - Patients with severe skin diseases (e.g., skin cancer, erysipelas, severe eczema, severe  
21 dermatitis, severe psoriasis and severe hives lupus);  
22  
23 - Patients with LBP associated with nerve root compromise (measured by clinical  
24 examination of dermatomes, myotomes, and reflexes) (34, 35);  
25  
26 - Serious spinal pathologies such as fractures, tumors, inflammatory and infectious  
27 diseases;  
28  
29 - Decompensated heart disease or metabolic disorders;  
30  
31 - Previous spinal surgery;  
32  
33 - Pregnancy.

### 34 35 36 **Interventions**

37  
38  
39 For ethical reasons, on the first day of treatment, all groups will receive an  
40 information booklet on LBP called "The Back Book" (36) based on the recommendations of  
41 the European Guidelines (35, 37). The booklet can be accessed freely via internet and it has  
42 been translated into Portuguese by our research team. At each treatment session, patients will  
43 receive further explanations on the contents of the booklet. There is consistent evidence that  
44 *The Back Book* is useful for patients with LBP (38) and it has been used in clinical trials  
45 conducted by our research group (39, 40).

46  
47  
48 Patients will then be randomly allocated to two groups to be submitted to the active  
49 PBMT or Placebo interventions. The active and placebo PBMT will be performed using the  
50 same device and the irradiated sites will be the same in both therapies. To ensure blinding for  
51 therapists and patients, the device will emit the same sounds and the same information on the  
52 display regardless of the programmed mode (active or placebo). Furthermore, because the  
53  
54  
55  
56  
57  
58  
59  
60

1  
2  
3 device produces a nonsignificant amount of heat (41), the patients will not be able to know if  
4 active or placebo PBMT will be administered. The device was previously coded as active or  
5 placebo modes, and only one researcher not involved in the randomization, treatment and  
6 evaluation is aware of these codes. Patients will undergo treatment (active PBMT or  
7 placebo), according to prior randomization, 3 times a week (with a minimal interval of 24  
8 hours) for 4 consecutive weeks, totaling 12 therapy sessions. The choice of treatment  
9 frequency was based on Basford et al. (18). The total treatment (active PBMT or placebo)  
10 time will be 27 minutes per patient. The patients will be positioned preferably in prone.  
11 However, in specific cases where patients do not tolerate this position due to pain, we will  
12 respect the patient's preferred positioning. Intervention specifications:

13  
14  
15  
16  
17  
18  
19  
20 1. Active PBMT Group: The PBMT will be performed using the Multi Radiance  
21 Medical™ Super Pulsed Laser MR4™ console (Solon, OH, USA), with the SE25 (emitter  
22 with an area of 4 cm<sup>2</sup>) and LaserShower (emitter with an area of 20 cm<sup>2</sup>) cluster probes as  
23 emitters. Nine sites will be irradiated on the patient's lumbar region. PBMT irradiation sites  
24 were chosen based on previous studies (18-21) and in order to cover the largest possible area  
25 of the lumbar spine: 3 central sites on top of the spinous processes (between T11 and T12,  
26 L2 and L3, L5 and S1), using the SE25 (3000 Hz of frequency, 3 minutes of irradiation per  
27 site, 24.75 J per site, a totalizing 74.25 J irradiated from SE25); in the same direction, but  
28 laterally, 3 sites on the left and 3 on the right (on the paravertebral muscles), using the  
29 LaserShower (1000 Hz of frequency, 3 minutes of irradiation per site, 24.30 J per site, a total  
30 of 145.80 J irradiated from LaserShower). At each treatment session, patients will receive a  
31 total dose of 220.05 J. At the end of the 12 treatments sessions, patients will receive a total  
32 dose of 2640.60 J. Table 1 shows parameters for SE25™ and LaserShower™ cluster probe.

33  
34  
35  
36  
37  
38  
39  
40  
41 This PBMT application protocol was based on the study of Leal Junior et al. (42).  
42  
43 Figure 1 shows the PBMT irradiation sites.  
44  
45  
46  
47  
48  
49  
50  
51  
52  
53  
54  
55  
56  
57  
58  
59  
60

**Table 1.** Parameters for SE25™ and LaserShower™ cluster probe.

|                                                | <b>SE25™</b>                                                                             | <b>LaserShower™</b>                                                                      |
|------------------------------------------------|------------------------------------------------------------------------------------------|------------------------------------------------------------------------------------------|
| Number of lasers                               | 1 Super-pulsed infrared                                                                  | 4 Super-pulsed infrared                                                                  |
| Wavelength (nm)                                | 905 (±1)                                                                                 | 905 (±1)                                                                                 |
| Frequency (Hz)                                 | 3000                                                                                     | 1000                                                                                     |
| Peak power (W) - each                          | 25                                                                                       | 12.5                                                                                     |
| Average mean optical output (mW) - each        | 7.5                                                                                      | 1.25                                                                                     |
| Power density (mW/cm <sup>2</sup> ) - each     | 17.05                                                                                    | 2.84                                                                                     |
| Energy density (J/cm <sup>2</sup> ) - each     | 3.07                                                                                     | 0.511                                                                                    |
| Dose (J) - each                                | 1.35                                                                                     | 0.225                                                                                    |
| Spot size of laser (cm <sup>2</sup> ) - each   | 0.44                                                                                     | 0.44                                                                                     |
| Number of red LEDs                             | 4 Red                                                                                    | 4 Red                                                                                    |
| Wavelength of red LEDs (nm)                    | 640 (±10)                                                                                | 640 (±10)                                                                                |
| Frequency (Hz)                                 | 2                                                                                        | 2                                                                                        |
| Average optical output (mW) - each             | 15                                                                                       | 15                                                                                       |
| Power density (mW/cm <sup>2</sup> ) - each     | 16.67                                                                                    | 16.67                                                                                    |
| Energy density (J/cm <sup>2</sup> ) - each     | 3                                                                                        | 3                                                                                        |
| Dose (J) - each                                | 2.7                                                                                      | 2.7                                                                                      |
| Spot size of red LED (cm <sup>2</sup> ) - each | 0.9                                                                                      | 0.9                                                                                      |
| Number of infrared LEDs                        | 4 Infrared                                                                               | 4 Infrared                                                                               |
| Wavelength of infrared LEDs (nm)               | 875 (±10)                                                                                | 875 (±10)                                                                                |
| Frequency (Hz)                                 | 16                                                                                       | 16                                                                                       |
| Average optical output (mW) - each             | 17.5                                                                                     | 17.5                                                                                     |
| Power density (mW/cm <sup>2</sup> ) - each     | 19.44                                                                                    | 19.44                                                                                    |
| Energy density (J/cm <sup>2</sup> ) - each     | 3.5                                                                                      | 3.5                                                                                      |
| Dose (J) - each                                | 3.15                                                                                     | 3.15                                                                                     |
| Spot Size of LED (cm <sup>2</sup> ) - each     | 0.9                                                                                      | 0.9                                                                                      |
| Magnetic Field (mT)                            | 35                                                                                       | 35                                                                                       |
| Irradiation time per site (sec)                | 180                                                                                      | 180                                                                                      |
| Total dose per site (J)                        | 24.75                                                                                    | 24.30                                                                                    |
| Aperture of device (cm <sup>2</sup> )          | 4                                                                                        | 20                                                                                       |
| Application mode                               | Cluster probe held stationary in skin contact with a 90-degree angle and slight pressure | Cluster probe held stationary in skin contact with a 90-degree angle and slight pressure |

&lt;&lt; Figure 1 &gt;&gt;

2. Placebo PBMT Group: The placebo PBMT will be delivered using the same device that active PBMT, but without any emission of therapeutic dose. Patients will receive a total dose of 0 J in placebo mode. The placebo mode simulates the pragmatism of clinical practice and increases the credibility of the use of the equipment in relation to the treated

1  
2  
3 patients. The placebo technique has already been widely used in other studies with patients  
4 with LBP (40, 43-48), as well as in studies using PBMT (41, 49, 50).  
5

6 We will use two different emitters in PBMT (active or placebo) because we have  
7 different objectives in each application area, which consequently require different  
8 mechanisms of action. We will use the SE25 emitter on the spinous processes in order to  
9 inhibit pain. Considering the smaller area of this emitter (4 cm<sup>2</sup>), the power density will be  
10 increased, which will consequently induce the triggering of inhibitory effects, such as a  
11 decrease in the axonal flow and thus analgesic effects (51, 52). In addition, the higher  
12 frequency used in this emitter will also increase the number of photons that will reach the  
13 target tissue, which will also promote the triggering of inhibitory effects and consequent  
14 analgesic effect. For the erector spinae muscles, we will use the LaserShower 50 (LS50)  
15 emitter in order to promote photobiostimulatory effects, considering the larger area of the  
16 device (20 cm<sup>2</sup>), with consequent lower power density. In addition, this emitter has a lower  
17 frequency, which will consequently decrease the number of photons delivered to the target  
18 tissue. With these factors, we believe that we will promote an increase in the production of  
19 ATP (24, 25), an increase in microcirculation (23) and consequently a decrease in muscle  
20 fatigue and stiffness. This therapeutic strategy using different emitters and different  
21 frequencies showed positive effects in the reduction of nonspecific knee pain in a previous  
22 study that used this same PBMT device and these same emitters (42), however the  
23 frequencies and doses were adapted for back pain patients.  
24  
25  
26  
27  
28  
29  
30  
31  
32  
33  
34  
35

36 The CONSORT flowchart summarizing experimental procedures and patients are  
37 shown in figure 2.  
38

39 << Figure 2 >>  
40  
41  
42

### 43 **Outcomes**

44  
45  
46 Primary outcomes of the study will be obtained at baseline and immediately after the  
47 last treatment session (4 weeks). Secondary outcomes of the study will be obtained at  
48 baseline, at the end of treatment (4 weeks), and 3, 6, and 12 months after randomization.  
49 These outcomes will be collected by an assessor who will not be aware of patient allocation  
50 to their treatment groups.  
51  
52  
53

54 The primary outcomes of the study will be:

- 55 - Pain intensity measured by the Pain Numerical Rating Scale (53). Pain Numerical  
56 Rating Scale evaluates pain intensity levels perceived by the patient on an 11-point  
57  
58  
59  
60

1  
2  
3 scale ranging from 0 to 10, with 0 being "no pain" and 10 "the worst possible pain"  
4 (53). Patients will be instructed to score the level of pain intensity based on the last 7  
5 days.  
6  
7

- 8  
9  
10  
11  
12  
13  
14  
15  
16  
17
- Disability associated with LBP, as measured by the Roland-Morris Disability Questionnaire (54, 55). The questionnaire consists of 24 items that describe situations that patients may have difficulty performing on a daily basis due to LBP. The greater the number of affirmative answers is, the higher the level of functional disability associated with LBP (53, 55). Patients will be instructed to answer according to their condition on the day of administration of the questionnaire.

18 The secondary outcomes of the study will be:

- 19  
20  
21  
22  
23  
24  
25  
26  
27  
28  
29  
30  
31  
32  
33  
34  
35  
36  
37  
38  
39  
40  
41  
42  
43  
44  
45  
46
- Specific disability, as measured by the Patient-Specific Functional Scale (53). The Patient-Specific Functional Scale is global and can be used for any part of the body. The measurement is done on an 11-point Likert scale for each activity, and the higher the average score is (ranging from 0 and 10 points), the better the patient's ability to perform the activities. The patients will be asked to identify up to three activities that they consider they are incapable of performing or that they have some difficulty performing (53, 56, 57).
  - Global perceived effect as measured by the Global Perceived Effect Scale (53). Global Perceived Effect Scale is an 11-point Likert scale, ranging from -5 to +5, that compares the patient's current condition to the onset of symptoms (53). Positive scores represent improvement, while the negative scores represent worsening in relation to the onset of symptoms. Values closer to 5 mean greater intensity of this perception (53).
  - Pain intensity measured by the Pain Numerical Rating Scale (53).
  - Disability associated with LBP, as measured by the Roland-Morris Disability Questionnaire (54, 55).

### 47 48 **Sample size**

49  
50  
51 The sample calculation of the study was performed to detect a 1-point difference for  
52 the outcome pain intensity (as measured by the Pain Numerical Rating Scale) (53), with an  
53 estimated standard deviation of 1.84 points and 4 points for the outcome disability associated  
54 with LBP (measured by the Roland-Morris Disability Questionnaire) (54, 55), with an  
55 estimated standard deviation of 4.9 points. A statistical power of 80% was considered for the  
56  
57  
58  
59  
60

1  
2  
3 two outcomes, with  $\alpha$  of 5% and a possible sample loss of up to 15%. Therefore, a total of  
4 148 patients will be required for the study.  
5  
6  
7

### 8 **Recruitment**

9  
10  
11 Patients seeking treatment for chronic LBP will be recruited at primary or secondary  
12 care health services. We will partner with supervising clinicians at primary and secondary  
13 health services so that they will refer chronic non-specific LBP patients to our study for  
14 treatment.  
15  
16  
17

### 18 **Randomization**

19  
20  
21 Prior to initiation of treatment, patients will be randomized into their respective  
22 intervention groups. The randomization will be generated by a computer program (Excel  
23 Office 2010) and performed by a participating researcher not involved with the recruitment  
24 or evaluation of patients. This same researcher will be responsible for programming the  
25 PBMT device according to the result of the randomization. The PBMT device used in the  
26 present study will make the same sounds regardless of the programmed dose and mode  
27 (active PBMT or placebo PBMT). This researcher will be instructed not to disclose the  
28 programmed intervention to the therapist or any of the patients and other researchers  
29 involved in the study until its completion. Patient and therapist will be blinded throughout  
30 the treatment. Concealed allocation will be achieved through the use of sequentially  
31 numbered, sealed, and opaque envelopes.  
32  
33  
34  
35  
36  
37  
38  
39  
40  
41

### 42 **Data collection**

43  
44  
45 The patients will be welcomed by the study's blinded assessor who will determine  
46 whether they will be eligible to participate in the study. Subsequently, a file will be  
47 completed with the patient's sociodemographic data and clinical history. Next, the primary  
48 outcomes and the secondary outcomes of the study will be collected. Then, all eligible  
49 patients will be randomized and allocated into two treatment groups: active PBMT or  
50 placebo PBMT. At the end of the 12 treatment sessions, the primary and secondary outcomes  
51 of the study participants will be reassessed by the same evaluator who performed the  
52 baseline assessment. The 3, 6, and 12-month follow-ups will be performed by telephone by  
53 the same evaluator who carried out the other evaluations. All of the questionnaires that will  
54  
55  
56  
57  
58  
59  
60

1  
2  
3 be used in the present study have been fully tested for their measurement properties (53, 55).  
4 These measurement properties were also tested over the phone. Therefore, we are confident  
5 that the assessments are reliable.  
6  
7

### 8 9 **Statistical Analysis**

10  
11  
12 The statistical analysis will be conducted following the principles of intention-to-treat  
13 analysis (58). The normality of the data will be tested by visual inspection of histograms and  
14 the characterization of the participants will be calculated using descriptive statistical tests.  
15 The between-group differences (treatment effects) and their respective 95% confidence  
16 intervals will be calculated by using mixed linear models (59) using the group-by-time  
17 interaction terms. The analyses will be performed using SPSS version 19.  
18  
19  
20  
21  
22

### 23 24 **Ethics**

25  
26  
27 The present study was approved by the Research Ethics Committee of Universidade  
28 Cidade de São Paulo (UNICID) under number 1.964.094. All patients eligible for the study  
29 will be informed of the objectives and will be required to complete the Informed Consent  
30 Form, as determined by Brazilian National Health Council Resolution 196/96.  
31  
32  
33

### 34 35 **Dissemination**

36  
37  
38 The study will be disseminated through publication in peer-reviewed international  
39 journals, as well as presentations at national and international conferences.  
40  
41  
42

### 43 44 **Discussion**

45  
46  
47 Chronic LBP is a condition that is often associated with disability, emotional  
48 alterations, and absenteeism from work (8). Since chronic LBP is very prevalent (11), it has  
49 a great financial impact, generating high costs, both direct and indirect (60). This fact  
50 demonstrates the importance of the constant investigation of more suitable treatments for  
51 LBP, aiming at the well-being of the patient and the reduction of expenses for health  
52 systems.  
53  
54  
55  
56  
57  
58  
59  
60

1  
2  
3 PBMT is one of the interventions recommended for the treatment of chronic LBP  
4 (31), however, it is a relatively recent therapy given that the first clinical trial investigating  
5 its effects on LBP was published in 1999 (18). Since then, there are still conflicts in the  
6 literature about PBMT in LBP. Although there is evidence that PBMT is no better than  
7 placebo treatment on pain and disability in a mixed sample of patients with acute and chronic  
8 LBP (32), some studies have demonstrated the efficacy of PBMT in chronic and acute LBP  
9 (18-21). Nevertheless, there are still issues to be clarified about its efficacy, as there are no  
10 high-quality methodological studies that test PBMT versus placebo in LBP patients. To date,  
11 studies evaluating the effects of PBMT on chronic non-specific LBP have not been  
12 prospectively registered (18-21, 32); have a small sample size (18, 19, 21, 32) and have high  
13 risk of bias. In addition, none of the studies were either triple blinded or were analyzed using  
14 intention to treat principles.  
15  
16

17  
18 It is extremely important to carry out studies with high methodological quality aimed  
19 at contributing to a better understanding of the effects of PBMT on LBP. Only then will it be  
20 possible to determine whether PBMT can be used as one of the treatments of choice for LBP.  
21 If the effectiveness of PBMT in LBP is confirmed, it could be used as an alternative method  
22 to NSAIDs or opioids, for example, since it causes similar or superior effects to these drugs,  
23 shown in other chronic musculoskeletal disorders (61, 62), without the presence of known  
24 adverse effects at present. We believe that, by providing relevant and compelling  
25 information about PBMT, we will contribute to a safer and more effective clinical practice.  
26  
27

28  
29 Nevertheless, it is important to highlight that PBMT presents a biphasic dose-  
30 response pattern, i.e., within a therapeutic window (dose range) the biostimulation effects  
31 can be seen. Very low doses may not trigger responses in the irradiated tissue, whereas very  
32 high doses may cause inhibition (52). In addition, the power and time of irradiation are also  
33 extremely important parameters to obtain better results with the PBMT (63). Therefore, the  
34 choice of PBMT parameters is essential for obtaining positive results and represents an  
35 important challenge in treating any musculoskeletal disorder. To date, there is great  
36 heterogeneity in the parameters of PBMT used for the treatment of LBP, and it is not  
37 possible to conclude the best dose for the treatment of this disorder. Thus, our parameters  
38 were adapted from the best evidence available (42) and took into consideration the dosage  
39 recommended by World Association for Laser Therapy (WALT) (63). Therefore, although  
40 we believe that the dosage chosen for the present study is the most likely to be effective in  
41 triggering the expected results, a limitation of our study is that we will test only one dose of  
42 PBMT.  
43  
44  
45  
46  
47  
48  
49  
50  
51  
52  
53  
54  
55  
56  
57  
58  
59  
60



1  
2  
3 The present study can be considered to have high methodological quality, since it is a  
4 randomized, controlled, and prospectively registered clinical trial. In addition, one of the  
5 strengths of the study is that it is triple-blinded, i.e., evaluators, therapists, and patients will  
6 be blinded to interventions over the course of the study. Finally, the sample size was  
7 calculated to provide the appropriate statistical power to detect precise differences in the  
8 primary outcomes of the study. Therefore, we believe that this study will contribute to the  
9 evidence-based practice of PBMT in patients with chronic LBP.  
10  
11  
12  
13

### 14 15 **Author contributions**

16  
17  
18  
19 SST and LOPC contributed to the concept and design of the study. SST and LOPC  
20 established the hypothesis and wrote the original proposal. SST, LCMC, LSG, ACA, DPN,  
21 FCM, MAA and LOPC contributed significantly in creating the manuscript. LCMC and  
22 LOPC performed critical revisions of the manuscript. SST, LCMC and LOPC wrote the final  
23 version of the manuscript. All authors read and approved the final version of the manuscript.  
24  
25  
26  
27

### 28 29 **Conflict of interest**

30 The authors declare no conflict of interest.  
31  
32  
33  
34  
35  
36  
37  
38  
39  
40  
41  
42  
43  
44  
45  
46  
47  
48  
49  
50  
51  
52  
53  
54  
55  
56  
57  
58  
59  
60

**References:**

1. Tulder MV. Chapter 1. European guidelines. *Eur Spine J* 2006;15:134-35.
2. American Academy Of Orthopaedic Surgeons. *US Bone and Joint Decade - The Burden of Musculoskeletal Diseases in the United States*. Rosemont, IL, USA, 2008.
3. Dagenais S, Caro J, Haldeman SA. systematic review of low back pain cost of illness studies in the United States and internationally. *Spine J*. 2008;8:8-20.
4. Murray CJ, Lopez AD. Measuring the global burden of disease. *N Engl J Med*. 2013;369:448-457.
5. Hoy D, Bain C, Williams G, March L, Brooks P, Blyth F, et al. A systematic review of the global prevalence of low back pain. *Arthritis Rheum*. 2012;64:2028-37.
6. Henschke N, Maher CG, Refshauge KM, Herbert RD, Cumming RG, Bleasel J, et al. Prognosis in patients with recent onset low back pain in Australian primary care: inception cohort study. *BMJ*. 2008;337:a171.
7. Costa Lda C, Maher CG, Mcauley JH, Hancock MJ, Herbert RD, Refshauge KM, et al. Prognosis for patients with chronic low back pain: inception cohort study. *BMJ*. 2009;339:b3829.
8. Da C Menezes Costa L, Maher CG, Hancock MJ, Mcauley JH, Herbert RD, Costa LO. The prognosis of acute and persistent low-back pain: a meta-analysis. *CMAJ*. 2012;184:E613-624.
9. Beattie PF, Silfies SP, Jordon M. The evolving role of physical therapists in the long-term management of chronic low back pain: longitudinal care using assisted self-management strategies. *Braz J Phys Ther* 2016;20:580-91.
10. Medeiros FC, Costa LO, Added MA, Salomão EC, Costa LD. Longitudinal Monitoring of Patients With Chronic Low Back Pain During Physical Therapy Treatment Using the STarT Back Screening Tool. *J Orthop Sports Phys Ther*. 2017;47:314-323.
11. Maher C, Underwood M, Buchbinder R. Non-specific low back pain. *Lancet*. 2017;389:736-47.
12. Bjordal JM, Ljunggren AE, Klovning A, Slørdal L. Non-steroidal anti-inflammatory drugs, including cyclo-oxygenase-2 inhibitors, in osteoarthritic knee pain: meta-analysis of randomised placebo controlled trials. *BMJ*. 2004;329:1317.
13. Chou R. Pharmacological management of low back pain. *Drugs*. 2010;70:387-402.
14. Dagenais S, Tricco AC, Haldeman S. Synthesis of recommendations for the assessment and management of low back pain from recent clinical practice guidelines. *Spine J*. 2010;10:514-29.
15. Van Middelkoop M, Rubinstein SM, Kuijpers T, Verhagen AP, Ostelo R, Koes BW, et

- 1  
2  
3 al. A systematic review on the effectiveness of physical and rehabilitation interventions for  
4 chronic non-specific low back pain. *Eur Spine J.* 2011;20:19-39.  
5  
6  
7 16. Bertagnoli R. Disc surgery in motion. *SpineLine.* 2004;5:23-28.  
8  
9 17. Sanders SH, Rucker KS, Anderson KO, Harden RN, Jackson KW, Vicente PJ, et al.  
10 Clinical practice guidelines for chronic non-malignant pain syndrome patients. *J Back*  
11 *Musculoskelet Rehabil.* 1995;5:115-20.  
12  
13 18. Basford JR, Sheffield CG, Harmsen WS. Laser therapy: a randomized, controlled trial of  
14 the effects of low-intensity Nd:YAG laser irradiation on musculoskeletal back pain. *Arch*  
15 *Phys Med Rehabil.* 1999;80:647-52.  
16  
17 19. Gur A, Karakoc M, Cevik R, Nas K, Sarac AJ, Karakoc M. Efficacy of low power laser  
18 therapy and exercise on pain and functions in chronic low back pain. *Lasers Surg Med.*  
19 2003;32:233-38.  
20  
21 20. Konstantinovic LM, Kanjuh ZM, Milovanovic AN, Cutovic MR, Djurovic AG, Savic  
22 VG, et al. Acute low back pain with radiculopathy: a double-blind, randomized, placebo-  
23 controlled study. *Photomed Laser Surg.* 2010;28:553-60.  
24  
25 21. Vallone F, Benedicenti S, Sorrenti E, Schiavetti I, Angiero F. Effect of diode laser in the  
26 treatment of patients with nonspecific chronic low back pain: a randomized controlled trial.  
27 *Photomed Laser Surg.* 2014;32:490-94.  
28  
29 22. Anders JJ, Lanzafame RJ, Arany PR. Low-level light/laser therapy versus  
30 photobiomodulation therapy. *Photomed Laser Surg.* 2015;33:183-184.  
31  
32 23. Tullberg M, Alstergren PJ, Ernberg MM. Effects of low-power laser exposure on  
33 masseter muscle pain and microcirculation. *Pain.* 2003;105:89-96.  
34  
35 24. Silveira PC, Silva LA, Fraga DB, Freitas TP, Streck EL, Pinho R. Evaluation of  
36 mitochondrial respiratory chain activity in muscle healing by low-level laser therapy. *J*  
37 *Photochem Photobiol B.* 2009;4:89-92  
38  
39 25. Albuquerque-Pontes GM, Vieira RP, Tomazoni SS, Caires CO, Nemeth V, Vanin AA, et  
40 al. Effect of pre-irradiation with different doses, wavelengths, and application intervals of  
41 low-level laser therapy on cytochrome c oxidase activity in intact skeletal muscle of rats.  
42 *Lasers Med Sci.* 2015;30:59-66.  
43  
44 26. Xu X, Zhao X, Liu TC, Pan H. Low-intensity laser irradiation improves the  
45 mitochondrial dysfunction of C2C12 induced by electrical stimulation. *Photomed Laser*  
46 *Surg.* 2008;26:197-202.  
47  
48 27. Avni D, Levkovitz S, Maltz L, Oron U. Protection of skeletal muscles from ischemic  
49 injury: low-level laser therapy increases antioxidant activity. *Photomed Laser Surg.*  
50 2005;23:273-277.  
51  
52 28. Rizzi CF, Mauriz JL, Freitas Corrêa DS, Moreira AJ, Zettler CG, Filippin LI, et al.  
53 Effects of low-level laser therapy (LLLT) on the nuclear factor (NF)-kappaB signaling  
54  
55  
56  
57  
58  
59  
60

1  
2  
3 pathway in traumatized muscle. *Lasers Surg Med.* 2006;38:704-13.  
4

5 29. Chow RT, Johnson MI, Lopes-Martins RA, Bjordal JM. Efficacy of low-level laser  
6 therapy in the management of neck pain: a systematic review and meta-analysis of  
7 randomised placebo or active-treatment controlled trials. *Lancet.* 2009;4:1897-908.  
8

9  
10 30. Glazov G, Yelland M, Emery J. Low-level laser therapy for chronic non-specific low  
11 back pain: a meta-analysis of randomised controlled trials. *Acupunct Med.* 2016;34:328-341.  
12

13 31. Qaseem A, Wilt TJ, McLean RM, Forcica MA. Clinical Guidelines Committee of the  
14 American College of Physicians. Noninvasive Treatments for Acute, Subacute, and Chronic  
15 Low Back Pain: A Clinical Practice Guideline From the American College of Physicians.  
16 *Ann Intern Med.* 2017;166:514-530.  
17

18 32. Ay S, Doğan SK, Evcik D. Is low-level laser therapy effective in acute or chronic low  
19 back pain? *Clin Rheumatol.* 2010;29:905-10.  
20

21  
22 33. Airaksinen O, Brox JJ, Cedraschi C, Hildebrandt J, Klüber-Moffett J, Kovacs F, et al.  
23 Chapter 4. European guidelines for the management of chronic nonspecific low back pain.  
24 *Eur Spine J.* 2006;15Suppl2:192-300.  
25

26 34. Magee, DJ. *Orthopedic Physical Assessment.* 6<sup>th</sup> Edition. Alberta, Canada: Elsevier  
27 2008:569-618.  
28

29  
30 35. Delitto A, George SZ, Van Dillen L, Whitman JM, Sowa G, Shekelle P et al. Low Back  
31 Pain. Clinical practice guidelines linked to the international classification of functioning,  
32 disability, and health from the orthopaedic section of the American Physical Therapy  
33 Association. *J Orthop Sports Phys Ther.* 2012;42:A1-A57.  
34

35 36. Manchester MR, Glasgow GW, York JKM, Huddersfield KB, Salford CM, Southampton  
36 TC. *The Back Book. Clinical Guidelines for the Management of Acute Low Back Pain.*  
37 2002;1-28.  
38

39  
40 37. Van Tulder M, Becker A, Bekkering T, Breen A, Del Real MT, Hutchinson A, et al.  
41 Chapter 3. European guidelines for the management of acute nonspecific low back pain in  
42 primary care. *Eur Spine J.* 2006;15Suppl2:S169-191.  
43

44 38. Engers A, Jellema P, Wensing M, Van Der Windt DA, Grol R, Van Tulder MW.  
45 Individual patient education for low back pain. *Cochrane Database Syst Rev.*  
46 2008;23:CD004057.  
47

48 39. Garcia AN, Costa L Da C, Hancock MJ, De Almeida MO, De Souza FS, Costa LO.  
49 Efficacy of the McKenzie method in patients with chronic nonspecific low back pain: a  
50 protocol of randomized placebo-controlled trial. *Phys Ther.* 2015;95:267-273.  
51

52  
53 40. Garcia AN, Hancock M, Costa LCM, De Souza, FS, Gomes GVFO, Almeida MO, et al.  
54 Efficacy of the mechanical diagnosis and therapy in patients with chronic nonspecific low  
55 back pain: a randomized placebo controlled trial. 2017; *Brit J Sports Med* [in press]  
56

57 41. Grandinetti V Dos S, Miranda EF, Johnson DS, De Paiva PR, Tomazoni SS, Vanin AA,  
58  
59  
60

1  
2  
3 et al. The thermal impact of phototherapy with concurrent super-pulsed lasers and red and  
4 infrared LEDs on human skin. *Lasers Med Sci.* 2015;30:1575-81.

5  
6 42. Leal-Junior EC, Johnson DS, Saltmarche A, Demchak T. Adjunctive use of combination  
7 of super-pulsed laser and light-emitting diodes phototherapy on nonspecific knee pain:  
8 double-blinded randomized placebo-controlled trial. *Lasers Med Sci.* 2014;29:1839-47.

9  
10 43. Costa LO, Maher CG, Latimer J, Hodges PW, Herbert RD, Refshauge KM.; et al. Motor  
11 control exercise for chronic low back pain: a randomized placebo-controlled trial. *Phys Ther.*  
12 2009;89:1275-86.

13  
14 44. Kumar SP. Efficacy of segmental stabilization exercise for lumbar segmental instability  
15 in patients with mechanical low back pain: A randomized placebo controlled crossover  
16 study. *N Am J Med Sci.* 2011;3:456-461.

17  
18 45. Ebadi S, Ansari NN, Naghdi S, Jalaei S, Sadat M, Bagheri H, et al. The effect of  
19 continuous ultrasound on chronic non-specific low back pain: a single blind placebo-  
20 controlled randomized trial. *BMC Musculoskelet Disord.* 2012;13:192.

21  
22 46. Balthazard P, De Goumoens P, Rivier G, Demeulenaere P, Ballabeni P, Dériaz O.  
23 Manual therapy followed by specific active exercises versus a placebo followed by specific  
24 active exercises on the improvement of functional disability in patients with chronic non  
25 specific low back pain: a randomized controlled trial. *BMC Musculoskelet Disord.*  
26 2012;13:162.

27  
28 47. Parreira Pdo C, Costa Lda C, Takahashi R, Hespanhol Junior LC, Luz Junior MA, Silva  
29 TM, Costa LO. Kinesio taping to generate skin convolutions is not better than sham taping  
30 for people with chronic non-specific low back pain: a randomised trial. *J Physiother.*  
31 2014;60:90-6.

32  
33 48. Luz Júnior MA, Sousa MV, Neves LA, Cezar AA, Costa LO. Kinesio Taping® is not  
34 better than placebo in reducing pain and disability in patients with chronic non-specific low  
35 back pain: a randomized controlled trial. *Braz J Phys Ther.* 2015;19:482-90.

36  
37 49. Antonialli FC, De Marchi T, Tomazoni SS, Vanin AA, Dos Santos Grandinetti V, De  
38 Paiva PR, et al. Phototherapy in skeletal muscle performance and recovery after exercise:  
39 effect of combination of super-pulsed laser and light-emitting diodes. *Lasers Med Sci.*  
40 2014;29:1967-76.

41  
42 50. Miranda EF, De Oliveira LV, Antonialli FC, Vanin AA, De Carvalho PdeT, Leal-Junior  
43 EC. Phototherapy with combination of super-pulsed laser and light-emitting diodes is  
44 beneficial in improvement of muscular performance (strength and muscular endurance),  
45 dyspnea, and fatigue sensation in patients with chronic obstructive pulmonary disease.  
46 *Lasers Med Sci.* 2015;30:437-43.

47  
48 51. Chow R, Armati P, Laakso EL, Bjordal JM, Baxter GD. Inhibitory effects of laser  
49 irradiation on peripheral mammalian nerves and relevance to analgesic effects: a systematic  
50 review. *Photomed Laser Surg.* 2011;29:365-81.

- 1  
2  
3 52. Huang YY, Sharma SK, Carrol J, Hamblin MR. Biphasic dose response in low level light  
4 therapy – an update. *Dose Response*. 2011;9:602-618.  
5  
6 53. Costa LO, Maher CG, Latimer J, Ferreira PH, Ferreira ML, Pozzi GC, et al. Clinimetric  
7 testing of three self-report outcome measures for low back pain patients in Brazil: which one  
8 is the best? *Spine (Phila Pa 1976)*. 2008;33:2459-63.  
9  
10 54. Nusbaum L, Natour J, Ferraz MB, Goldenberg J. Translation, adaptation and validation  
11 of the Roland-Morris questionnaire--Brazil Roland-Morris. *Braz J Med Biol Res*.  
12 2001;34:203-210.  
13  
14 55. Costa LO, Maher CG, Latimer J, Ferreira PH, Pozzi GC, Ribeiro RN. Psychometric  
15 characteristics of the Brazilian-Portuguese versions of the Functional Rating Index and the  
16 Roland Morris Disability Questionnaire. *Spine (Phila Pa 1976)*. 2007;32:1902-07.  
17  
18 56. Chatman AB, Hyams SP, Neel JM, Binkley JM, Stratford PW, Schomberg A, et al. The  
19 Patient-Specific Functional Scale: measurement properties in patients with knee dysfunction.  
20 *Phys Ther*. 1997;77:820-29.  
21  
22 57. Pengel LH, Refshauge KM, Maher CG. Responsiveness of pain, disability, and physical  
23 impairment outcomes in patients with low back pain. *Spine (Phila Pa 1976)*. 2004;29:879-83.  
24  
25 58. Elkins MR, Moseley AM. Intention-to-treat analysis. *J Physiother*. 2015;61:165-67.  
26  
27 59. Twisk JWR. *Applied Longitudinal Data Analysis for Epidemiology: A Practical Guide*  
28 ISBN: 0521819768, 9780511061608; 2003.  
29  
30 60. Walker BF, Muller R, Grant WD. Low back pain in Australia adults: the economic  
31 burden. *Asia Pac J Public Health*. 2003;15:79-87.  
32  
33 61. Tomazoni SS, Leal-Junior EC, Frigo L, Pallotta RC, Teixeira S, de Almeida P, et al.  
34 Isolated and combined effects of photobiomodulation therapy, topical nonsteroidal anti-  
35 inflammatory drugs, and physical activity in the treatment of osteoarthritis induced by  
36 papain. *J Biomed Opt*. 2016;21:108001.  
37  
38 62. Tomazoni SS, Leal-Junior EC, Pallotta RC, Teixeira S, De Almeida P, Lopes-Martins  
39 R.Á. Effects of photobiomodulation therapy, pharmacological therapy, and physical exercise  
40 as single and/or combined treatment on the inflammatory response induced by experimental  
41 osteoarthritis. *Lasers Med Sci*. 2017;32:101-108.  
42  
43 63. World Association for Laser Therapy - WALT (2010): Dosage recommendations.  
44 Recommended treatment doses for low level laser therapy. Available in:  
45 <http://www.walt.nu/dosage-recommendations.html>. Accessed May 30, 2017.  
46  
47  
48  
49  
50

## 51 52 **FIGURE LEGENDS**

53  
54 Table 1. Parameters for SE25™ and LaserShower™ cluster probe.  
55  
56

57  
58 Figure 1. PBMT irradiation sites.  
59  
60

1  
2  
3  
4  
5  
6  
7  
8  
9  
10  
11  
12  
13  
14  
15  
16  
17  
18  
19  
20  
21  
22  
23  
24  
25  
26  
27  
28  
29  
30  
31  
32  
33  
34  
35  
36  
37  
38  
39  
40  
41  
42  
43  
44  
45  
46  
47  
48  
49  
50  
51  
52  
53  
54  
55  
56  
57  
58  
59  
60

Figure 2. Flow diagram of the study.

For peer review only

1  
2  
3  
4  
5  
6  
7  
8  
9  
10  
11  
12  
13  
14  
15  
16  
17  
18  
19  
20  
21  
22  
23  
24  
25  
26  
27  
28  
29  
30  
31  
32  
33  
34  
35  
36  
37  
38  
39  
40  
41  
42  
43  
44  
45  
46  
47  
48  
49  
50  
51  
52  
53  
54  
55  
56  
57  
58  
59  
60

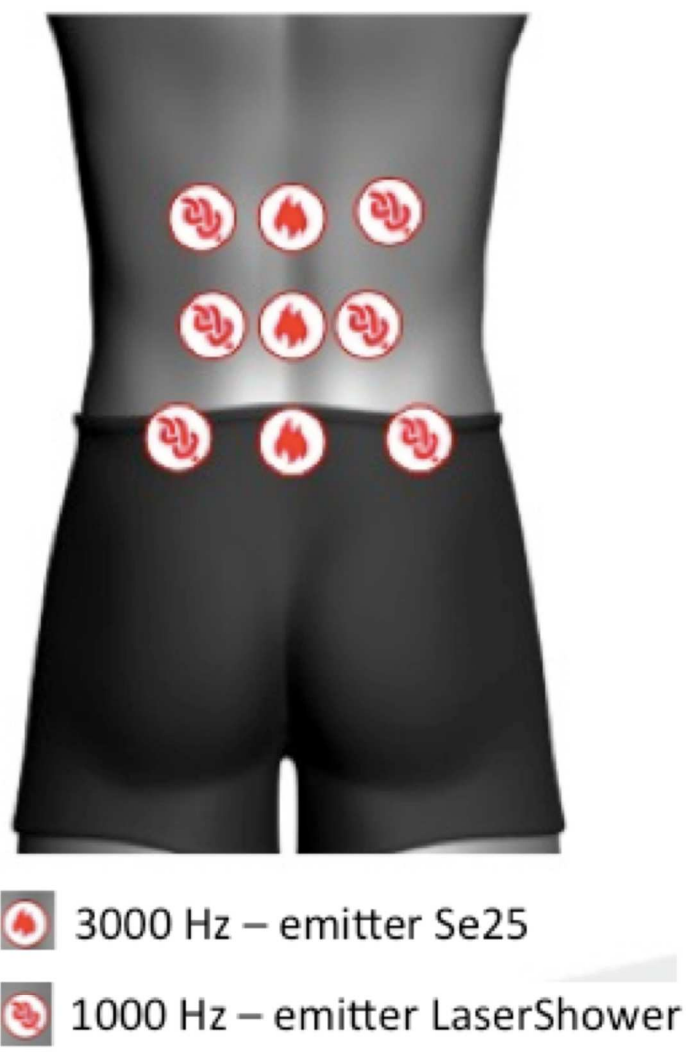

Figure 1. PBMT irradiation sites.  
109x158mm (300 x 300 DPI)



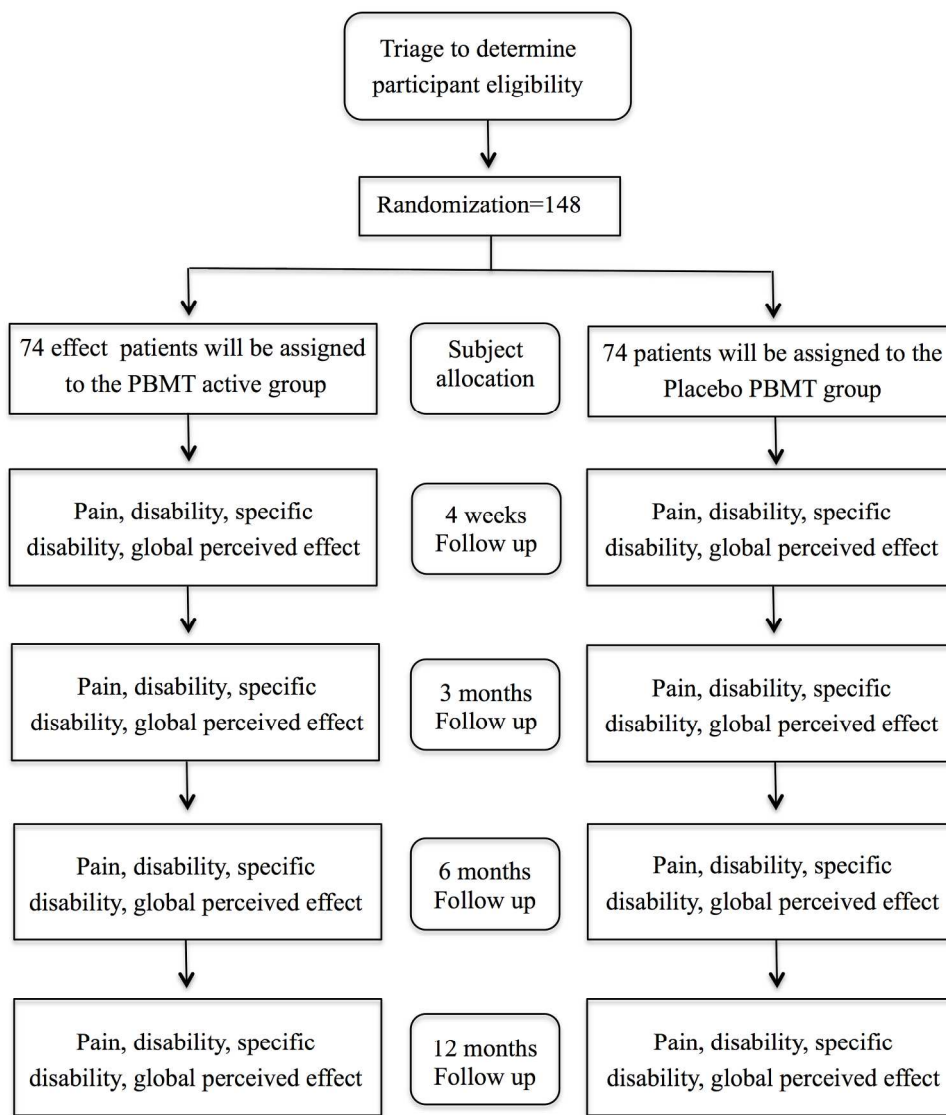

Figure 2. Flow diagram of the study.

197x227mm (300 x 300 DPI)

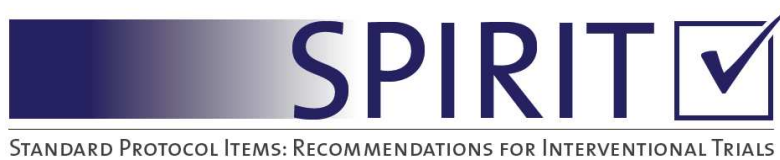

SPIRIT 2013 Checklist: Recommended items to address in a clinical trial protocol and related documents\*

| Section/item                      | Item No | Description                                                                                                                                                                                                                                                                              | Page Number |
|-----------------------------------|---------|------------------------------------------------------------------------------------------------------------------------------------------------------------------------------------------------------------------------------------------------------------------------------------------|-------------|
| <b>Administrative information</b> |         |                                                                                                                                                                                                                                                                                          |             |
| Title                             | 1       | Descriptive title identifying the study design, population, interventions, and, if applicable, trial acronym                                                                                                                                                                             | 1           |
| Trial registration                | 2a      | Trial identifier and registry name. If not yet registered, name of intended registry                                                                                                                                                                                                     | 1           |
|                                   | 2b      | All items from the World Health Organization Trial Registration Data Set                                                                                                                                                                                                                 | 1           |
| Protocol version                  | 3       | Date and version identifier                                                                                                                                                                                                                                                              | 1           |
| Funding                           | 4       | Sources and types of financial, material, and other support                                                                                                                                                                                                                              | 1           |
| Roles and responsibilities        | 5a      | Names, affiliations, and roles of protocol contributors                                                                                                                                                                                                                                  | 1           |
|                                   | 5b      | Name and contact information for the trial sponsor                                                                                                                                                                                                                                       | 1           |
|                                   | 5c      | Role of study sponsor and funders, if any, in study design; collection, management, analysis, and interpretation of data; writing of the report; and the decision to submit the report for publication, including whether they will have ultimate authority over any of these activities | 1           |
|                                   | 5d      | Composition, roles, and responsibilities of the coordinating centre, steering committee, endpoint adjudication committee, data management team, and other individuals or groups overseeing the trial, if applicable (see Item 21a for data monitoring committee)                         | 1           |
| <b>Introduction</b>               |         |                                                                                                                                                                                                                                                                                          |             |
| Background and rationale          | 6a      | Description of research question and justification for undertaking the trial, including summary of relevant studies (published and unpublished) examining benefits and harms for each intervention                                                                                       | 4           |
|                                   | 6b      | Explanation for choice of comparators                                                                                                                                                                                                                                                    | 7           |
| Objectives                        | 7       | Specific objectives or hypotheses                                                                                                                                                                                                                                                        | 5           |
| Trial design                      | 8       | Description of trial design including type of trial (eg, parallel group, crossover, factorial, single group), allocation ratio, and framework (eg, superiority, equivalence, noninferiority, exploratory)                                                                                | 5           |

**Methods: Participants, interventions, and outcomes**

|                      |     |                                                                                                                                                                                                                                                                                                                                                                                |      |
|----------------------|-----|--------------------------------------------------------------------------------------------------------------------------------------------------------------------------------------------------------------------------------------------------------------------------------------------------------------------------------------------------------------------------------|------|
| Study setting        | 9   | Description of study settings (eg, community clinic, academic hospital) and list of countries where data will be collected. Reference to where list of study sites can be obtained                                                                                                                                                                                             | 5    |
| Eligibility criteria | 10  | Inclusion and exclusion criteria for participants. If applicable, eligibility criteria for study centres and individuals who will perform the interventions (eg, surgeons, psychotherapists)                                                                                                                                                                                   | 5, 6 |
| Interventions        | 11a | Interventions for each group with sufficient detail to allow replication, including how and when they will be administered                                                                                                                                                                                                                                                     | 6, 7 |
|                      | 11b | Criteria for discontinuing or modifying allocated interventions for a given trial participant (eg, drug dose change in response to harms, participant request, or improving/worsening disease)                                                                                                                                                                                 | 6, 7 |
|                      | 11c | Strategies to improve adherence to intervention protocols, and any procedures for monitoring adherence (eg, drug tablet return, laboratory tests)                                                                                                                                                                                                                              | 6, 7 |
|                      | 11d | Relevant concomitant care and interventions that are permitted or prohibited during the trial                                                                                                                                                                                                                                                                                  | 6, 7 |
| Outcomes             | 12  | Primary, secondary, and other outcomes, including the specific measurement variable (eg, systolic blood pressure), analysis metric (eg, change from baseline, final value, time to event), method of aggregation (eg, median, proportion), and time point for each outcome. Explanation of the clinical relevance of chosen efficacy and harm outcomes is strongly recommended | 7, 8 |
| Participant timeline | 13  | Time schedule of enrolment, interventions (including any run-ins and washouts), assessments, and visits for participants. A schematic diagram is highly recommended (see Figure)                                                                                                                                                                                               | 9    |
| Sample size          | 14  | Estimated number of participants needed to achieve study objectives and how it was determined, including clinical and statistical assumptions supporting any sample size calculations                                                                                                                                                                                          | 8, 9 |
| Recruitment          | 15  | Strategies for achieving adequate participant enrolment to reach target sample size                                                                                                                                                                                                                                                                                            | 9    |

**Methods: Assignment of interventions (for controlled trials)**

## Allocation:

|                     |     |                                                                                                                                                                                                                                                                                                                                                          |   |
|---------------------|-----|----------------------------------------------------------------------------------------------------------------------------------------------------------------------------------------------------------------------------------------------------------------------------------------------------------------------------------------------------------|---|
| Sequence generation | 16a | Method of generating the allocation sequence (eg, computer-generated random numbers), and list of any factors for stratification. To reduce predictability of a random sequence, details of any planned restriction (eg, blocking) should be provided in a separate document that is unavailable to those who enrol participants or assign interventions | 9 |
|---------------------|-----|----------------------------------------------------------------------------------------------------------------------------------------------------------------------------------------------------------------------------------------------------------------------------------------------------------------------------------------------------------|---|

|    |                |     |                                                                           |   |
|----|----------------|-----|---------------------------------------------------------------------------|---|
| 1  |                |     |                                                                           |   |
| 2  | Allocation     | 16b | Mechanism of implementing the allocation sequence (eg, central            | 9 |
| 3  | concealment    |     | telephone; sequentially numbered, opaque, sealed envelopes),              |   |
| 4  | mechanism      |     | describing any steps to conceal the sequence until interventions are      |   |
| 5  |                |     | assigned                                                                  |   |
| 6  |                |     |                                                                           |   |
| 7  | Implementation | 16c | Who will generate the allocation sequence, who will enrol participants,   | 9 |
| 8  |                |     | and who will assign participants to interventions                         |   |
| 9  |                |     |                                                                           |   |
| 10 | Blinding       | 17a | Who will be blinded after assignment to interventions (eg, trial          | 9 |
| 11 | (masking)      |     | participants, care providers, outcome assessors, data analysts), and      |   |
| 12 |                |     | how                                                                       |   |
| 13 |                |     |                                                                           |   |
| 14 |                | 17b | If blinded, circumstances under which unblinding is permissible, and      | 9 |
| 15 |                |     | procedure for revealing a participant's allocated intervention during the |   |
| 16 |                |     | trial                                                                     |   |
| 17 |                |     |                                                                           |   |
| 18 |                |     |                                                                           |   |

### Methods: Data collection, management, and analysis

|    |                 |     |                                                                            |    |
|----|-----------------|-----|----------------------------------------------------------------------------|----|
| 19 |                 |     |                                                                            |    |
| 20 |                 |     |                                                                            |    |
| 21 | Data collection | 18a | Plans for assessment and collection of outcome, baseline, and other        | 8  |
| 22 | methods         |     | trial data, including any related processes to promote data quality (eg,   |    |
| 23 |                 |     | duplicate measurements, training of assessors) and a description of        |    |
| 24 |                 |     | study instruments (eg, questionnaires, laboratory tests) along with their  |    |
| 25 |                 |     | reliability and validity, if known. Reference to where data collection     |    |
| 26 |                 |     | forms can be found, if not in the protocol                                 |    |
| 27 |                 |     |                                                                            |    |
| 28 |                 |     |                                                                            |    |
| 29 |                 | 18b | Plans to promote participant retention and complete follow-up, including   | 9  |
| 30 |                 |     | list of any outcome data to be collected for participants who discontinue  |    |
| 31 |                 |     | or deviate from intervention protocols                                     |    |
| 32 |                 |     |                                                                            |    |
| 33 | Data            | 19  | Plans for data entry, coding, security, and storage, including any related | 9  |
| 34 | management      |     | processes to promote data quality (eg, double data entry; range checks     |    |
| 35 |                 |     | for data values). Reference to where details of data management            |    |
| 36 |                 |     | procedures can be found, if not in the protocol                            |    |
| 37 |                 |     |                                                                            |    |
| 38 |                 |     |                                                                            |    |
| 39 | Statistical     | 20a | Statistical methods for analysing primary and secondary outcomes.          | 10 |
| 40 | methods         |     | Reference to where other details of the statistical analysis plan can be   |    |
| 41 |                 |     | found, if not in the protocol                                              |    |
| 42 |                 |     |                                                                            |    |
| 43 |                 | 20b | Methods for any additional analyses (eg, subgroup and adjusted             | 10 |
| 44 |                 |     | analyses)                                                                  |    |
| 45 |                 |     |                                                                            |    |
| 46 |                 | 20c | Definition of analysis population relating to protocol non-adherence (eg,  | 10 |
| 47 |                 |     | as randomised analysis), and any statistical methods to handle missing     |    |
| 48 |                 |     | data (eg, multiple imputation)                                             |    |
| 49 |                 |     |                                                                            |    |

### Methods: Monitoring

|    |                 |     |                                                                           |   |
|----|-----------------|-----|---------------------------------------------------------------------------|---|
| 50 |                 |     |                                                                           |   |
| 51 |                 |     |                                                                           |   |
| 52 | Data monitoring | 21a | Composition of data monitoring committee (DMC); summary of its role       | - |
| 53 |                 |     | and reporting structure; statement of whether it is independent from the  |   |
| 54 |                 |     | sponsor and competing interests; and reference to where further details   |   |
| 55 |                 |     | about its charter can be found, if not in the protocol. Alternatively, an |   |
| 56 |                 |     | explanation of why a DMC is not needed                                    |   |
| 57 |                 |     |                                                                           |   |
| 58 |                 |     |                                                                           |   |
| 59 |                 |     |                                                                           |   |
| 60 |                 |     |                                                                           |   |

|    |                                 |     |                                                                              |    |
|----|---------------------------------|-----|------------------------------------------------------------------------------|----|
| 1  |                                 | 21b | Description of any interim analyses and stopping guidelines, including       | -  |
| 2  |                                 |     | who will have access to these interim results and make the final             |    |
| 3  |                                 |     | decision to terminate the trial                                              |    |
| 4  |                                 |     |                                                                              |    |
| 5  |                                 |     |                                                                              |    |
| 6  | Harms                           | 22  | Plans for collecting, assessing, reporting, and managing solicited and       | -  |
| 7  |                                 |     | spontaneously reported adverse events and other unintended effects of        |    |
| 8  |                                 |     | trial interventions or trial conduct                                         |    |
| 9  |                                 |     |                                                                              |    |
| 10 | Auditing                        | 23  | Frequency and procedures for auditing trial conduct, if any, and             | -  |
| 11 |                                 |     | whether the process will be independent from investigators and the           |    |
| 12 |                                 |     | sponsor                                                                      |    |
| 13 |                                 |     |                                                                              |    |
| 14 |                                 |     |                                                                              |    |
| 15 | <b>Ethics and dissemination</b> |     |                                                                              |    |
| 16 |                                 |     |                                                                              |    |
| 17 | Research ethics approval        | 24  | Plans for seeking research ethics committee/institutional review board       | 10 |
| 18 |                                 |     | (REC/IRB) approval                                                           |    |
| 19 |                                 |     |                                                                              |    |
| 20 | Protocol amendments             | 25  | Plans for communicating important protocol modifications (eg, changes        | -  |
| 21 |                                 |     | to eligibility criteria, outcomes, analyses) to relevant parties (eg,        |    |
| 22 |                                 |     | investigators, REC/IRBs, trial participants, trial registries, journals,     |    |
| 23 |                                 |     | regulators)                                                                  |    |
| 24 |                                 |     |                                                                              |    |
| 25 | Consent or assent               | 26a | Who will obtain informed consent or assent from potential trial              | 10 |
| 26 |                                 |     | participants or authorised surrogates, and how (see Item 32)                 |    |
| 27 |                                 |     |                                                                              |    |
| 28 |                                 | 26b | Additional consent provisions for collection and use of participant data     | -  |
| 29 |                                 |     | and biological specimens in ancillary studies, if applicable                 |    |
| 30 |                                 |     |                                                                              |    |
| 31 | Confidentiality                 | 27  | How personal information about potential and enrolled participants will      | 10 |
| 32 |                                 |     | be collected, shared, and maintained in order to protect confidentiality     |    |
| 33 |                                 |     | before, during, and after the trial                                          |    |
| 34 |                                 |     |                                                                              |    |
| 35 |                                 |     |                                                                              |    |
| 36 | Declaration of interests        | 28  | Financial and other competing interests for principal investigators for      | 1  |
| 37 |                                 |     | the overall trial and each study site                                        |    |
| 38 |                                 |     |                                                                              |    |
| 39 | Access to data                  | 29  | Statement of who will have access to the final trial dataset, and            | 10 |
| 40 |                                 |     | disclosure of contractual agreements that limit such access for              |    |
| 41 |                                 |     | investigators                                                                |    |
| 42 |                                 |     |                                                                              |    |
| 43 | Ancillary and post-trial care   | 30  | Provisions, if any, for ancillary and post-trial care, and for compensation  | -  |
| 44 |                                 |     | to those who suffer harm from trial participation                            |    |
| 45 |                                 |     |                                                                              |    |
| 46 | Dissemination policy            | 31a | Plans for investigators and sponsor to communicate trial results to          | 10 |
| 47 |                                 |     | participants, healthcare professionals, the public, and other relevant       |    |
| 48 |                                 |     | groups (eg, via publication, reporting in results databases, or other data   |    |
| 49 |                                 |     | sharing arrangements), including any publication restrictions                |    |
| 50 |                                 |     |                                                                              |    |
| 51 |                                 |     |                                                                              |    |
| 52 |                                 | 31b | Authorship eligibility guidelines and any intended use of professional       | -  |
| 53 |                                 |     | writers                                                                      |    |
| 54 |                                 |     |                                                                              |    |
| 55 |                                 | 31c | Plans, if any, for granting public access to the full protocol, participant- | 10 |
| 56 |                                 |     | level dataset, and statistical code                                          |    |
| 57 |                                 |     |                                                                              |    |
| 58 |                                 |     |                                                                              |    |
| 59 |                                 |     |                                                                              |    |
| 60 |                                 |     |                                                                              |    |

**Appendices**

|                            |    |                                                                                                                                                                                                |
|----------------------------|----|------------------------------------------------------------------------------------------------------------------------------------------------------------------------------------------------|
| Informed consent materials | 32 | Model consent form and other related documentation given to participants and authorised surrogates                                                                                             |
| Biological specimens       | 33 | Plans for collection, laboratory evaluation, and storage of biological specimens for genetic or molecular analysis in the current trial and for future use in ancillary studies, if applicable |

---

\*It is strongly recommended that this checklist be read in conjunction with the SPIRIT 2013 Explanation & Elaboration for important clarification on the items. Amendments to the protocol should be tracked and dated. The SPIRIT checklist is copyrighted by the SPIRIT Group under the Creative Commons "[Attribution-NonCommercial-NoDerivs 3.0 Unported](#)" license.

# BMJ Open

## Effects of photobiomodulation therapy in patients with chronic non-specific low back pain: protocol for a randomized placebo-controlled trial

|                                 |                                                                                                                                                                                                                                                                                                                                                                                                                                                                                                                                                                                                                                                                                                                                                                                                                                                                  |
|---------------------------------|------------------------------------------------------------------------------------------------------------------------------------------------------------------------------------------------------------------------------------------------------------------------------------------------------------------------------------------------------------------------------------------------------------------------------------------------------------------------------------------------------------------------------------------------------------------------------------------------------------------------------------------------------------------------------------------------------------------------------------------------------------------------------------------------------------------------------------------------------------------|
| Journal:                        | <i>BMJ Open</i>                                                                                                                                                                                                                                                                                                                                                                                                                                                                                                                                                                                                                                                                                                                                                                                                                                                  |
| Manuscript ID                   | bmjopen-2017-017202.R2                                                                                                                                                                                                                                                                                                                                                                                                                                                                                                                                                                                                                                                                                                                                                                                                                                           |
| Article Type:                   | Protocol                                                                                                                                                                                                                                                                                                                                                                                                                                                                                                                                                                                                                                                                                                                                                                                                                                                         |
| Date Submitted by the Author:   | 04-Aug-2017                                                                                                                                                                                                                                                                                                                                                                                                                                                                                                                                                                                                                                                                                                                                                                                                                                                      |
| Complete List of Authors:       | Tomazoni, Shaiane; Universidade Cidade de Sao Paulo, Masters and Doctoral Programs in Physical Therapy<br>Costa, Lucíola; Universidade Cidade de Sao Paulo, Masters and Doctoral Programs in Physical Therapy<br>Guimarães, Layana; Universidade Cidade de Sao Paulo, Masters and Doctoral Programs in Physical Therapy<br>Araujo, Amanda; Universidade Cidade de Sao Paulo, Masters and Doctoral Programs in Physical Therapy<br>Nascimento, Dafne; Universidade Cidade de Sao Paulo, Masters and Doctoral Programs in Physical Therapy<br>Medeiros, Flavia; Universidade Cidade de Sao Paulo, Masters and Doctoral Programs in Physical Therapy<br>Avanzi, Marina; Universidade Cidade de Sao Paulo, Masters and Doctoral Programs in Physical Therapy<br>Costa, Leonardo; Universidade Cidade de Sao Paulo, Masters and Doctoral Programs in Physical Therapy |
| <b>Primary Subject Heading</b>: | Evidence based practice                                                                                                                                                                                                                                                                                                                                                                                                                                                                                                                                                                                                                                                                                                                                                                                                                                          |
| Secondary Subject Heading:      | Rehabilitation medicine                                                                                                                                                                                                                                                                                                                                                                                                                                                                                                                                                                                                                                                                                                                                                                                                                                          |
| Keywords:                       | chronic low back pain, photobiomodulation therapy, low-level laser therapy, LLLT, PBMT                                                                                                                                                                                                                                                                                                                                                                                                                                                                                                                                                                                                                                                                                                                                                                           |
|                                 |                                                                                                                                                                                                                                                                                                                                                                                                                                                                                                                                                                                                                                                                                                                                                                                                                                                                  |

SCHOLARONE™  
Manuscripts

1  
2  
3 **Effects of photobiomodulation therapy in patients with chronic non-specific low back**  
4 **pain: protocol for a randomized placebo-controlled trial**  
5  
6  
7

8 Shaiane Silva Tomazoni<sup>1\*</sup>, Lucíola da Cunha Menezes Costa<sup>1</sup>, Layana de Souza Guimarães<sup>1</sup>,  
9 Amanda Costa Araujo<sup>1</sup>, Dafne Port Nascimento<sup>1</sup>, Flávia Cordeiro de Medeiros<sup>1</sup>, Marina  
10 Athayde Avanzi<sup>1</sup> and Leonardo Oliveira Pena Costa<sup>1</sup>  
11  
12

13  
14  
15 <sup>1</sup>. Masters and Doctoral Programs in Physical Therapy, Universidade Cidade de São Paulo,  
16 Brazil.  
17

18  
19  
20 **Trial registration number:** NCT03089424  
21

22  
23 **Funding statement:** This work was supported by FAPESP (postdoctoral scholarship of  
24 Shaiane Silva Tomazoni) grant number 2016/10265-0.  
25  
26

27  
28 **Roles of study sponsor and funders:** FAPESP has no role in study design; collection,  
29 management, analysis, and interpretation of data; writing of the report; and the decision to submit the  
30 report for publication, including whether they will have ultimate authority over any of these  
31 activities.  
32  
33

34  
35  
36 **\*Author for correspondence:** Shaiane Silva Tomazoni  
37 Universidade Cidade de São Paulo. Rua Cesário Galeno, 448/475  
38 Tatuapé, São Paulo, SP, Brazil, 05508-900.  
39 e-mail: shaiane.tomazoni@gmail.com  
40  
41

42  
43  
44 **Number of figures and tables:** 2 figures and 1 table.  
45  
46

47 **Conflict of interest:** the authors declare no conflict of interest.  
48  
49  
50  
51  
52  
53  
54  
55  
56  
57  
58  
59  
60



## ABSTRACT

**Introduction:** Low back pain (LBP) is one of the largest and most frequent public health problems worldwide. Photobiomodulation therapy (PBMT) is a frequently used non-pharmacological therapy for the treatment of musculoskeletal disorders. However, there is little high-quality scientific evidence that demonstrates the effectiveness of PBMT in the treatment of patients with chronic LBP in the short, medium, and long term. Therefore, the objective of this clinical trial is to evaluate the effects of PBMT in patients with chronic non-specific LBP in the short, medium, and long term. **Methods and analyses:** This is a prospectively registered, two-arm randomized placebo-controlled trial with blinded patients, assessors and treatment providers. One hundred and forty-eight patients with chronic non-specific LBP will be recruited. Treatment sessions will be provided 3 times a week for 4 weeks (totaling 12 sessions) with patients receiving either placebo or active PBMT. For ethical reasons, all patients, regardless of treatment allocation, will also receive an information booklet based on "The Back Book". Clinical outcomes will be measured at baseline, at the end of treatment, as well as 3, 6, and 12 months after randomization. The primary outcomes will be pain intensity and disability measured after 12 sessions of treatment. The secondary outcomes will be pain intensity and disability measured at 3, 6, and 12 months after randomization, in addition to specific disability and global perceived effect in all time points. **Ethics and dissemination:** The study was approved by the Research Ethics Committee of Universidade Cidade de São Paulo. The results will be disseminated through scientific publications and presentations at national and international scientific meetings. Clinical trial registration number: NCT03089424 (clinicaltrials.gov).

**Key-words:** chronic low back pain, photobiomodulation therapy, low-level laser therapy, LLLT, PBMT.

### Strengths and limitations of this study:

- The present study can be considered to have high methodological quality, since it is a randomized, controlled, and prospectively registered clinical trial.
- One of the strengths of the study is that it is triple-blinded, i.e., outcome assessors, therapists, and patients will be blinded to interventions over the course of the study.
- The sample size was calculated to provide the appropriate statistical power to detect precise differences for the primary outcomes of the study.

- 1  
2  
3 - In our study, we will test the effects of a single dose of PBMT (i.e 24 Joules). PBMT  
4 is known to present a biphasic dose-response pattern, i.e., within a therapeutic  
5 window (dosage range) the effects of biostimulation can be observed. However, if  
6 dosages below or above this window are used, these effects may not be observed.  
7  
8 Therefore, the application of only one dose of PBMT may be considered a limitation  
9 of this trial. However, in order to minimize this limitation, we based the choice of our  
10 parameters using the best available evidence.  
11  
12  
13  
14  
15  
16  
17  
18  
19  
20  
21  
22  
23  
24  
25  
26  
27  
28  
29  
30  
31  
32  
33  
34  
35  
36  
37  
38  
39  
40  
41  
42  
43  
44  
45  
46  
47  
48  
49  
50  
51  
52  
53  
54  
55  
56  
57  
58  
59  
60

## INTRODUCTION

Low back pain (LBP) is ranked as one of the most prevalent health problems and is highly associated with disability worldwide (1-4). It is estimated that about 12% of the world's population suffers from LBP (5). Furthermore, LBP generates high levels of work absenteeism and excessive costs to health systems (1, 2). The prognosis of LBP is directly related to the duration of symptoms, with less favorable prognoses in patients with chronic LBP (i.e. with a duration of symptoms longer than three months) (6-10). Therefore, the ideal treatment for chronic LBP represents a significant challenge, since there are no treatments that cure persistent LBP. However, several interventions provide low to moderate effects in reducing pain and disability on this population (11). The existing treatments for LBP can be divided into three categories: 1) pharmacological therapies, which trigger several adverse effects with prolonged use (12-14); 2) non-pharmacological therapies, which minimize undesirable effects and are moderately effective in LBP (15); and surgery, used only when conservative treatment is not efficacious (16). Several therapies can be used to treat LBP by controlling symptoms, minimizing disability, and improving the patients' quality of life (17).

Photobiomodulation therapy (PBMT) is a non-pharmacological intervention often used in the treatment of musculoskeletal disorders such as LBP (18-21). PBMT consists in applying a non-ionized form of light, which includes laser (light amplification by stimulated emission of radiation), LED (light-emitting diodes), and other lights with a broader spectrum ranging from visible to infrared (22). Recent evidence (23-28) suggests that PBMT triggers positive physiological effects, such as increased microcirculation (23), increased ATP synthesis (24, 25) stimulation of the mitochondrial respiratory chain (24, 25), stimulation of mitochondrial function (26), and factors that may influence the metabolism of various pathologies. In addition, there is evidence that PBMT reduces the release of both reactive oxygen species (ROS) and creatine kinase (CK) activity and also increases the production of antioxidants and heat shock proteins (27, 28).

As PBMT has been successfully proved as an effective intervention for neck pain patients (29); it is likely that PBMT could also be a reasonable option for patients with LBP. A range of previous trial have shown the effects of PBMT on acute, subacute and chronic LBP. Basford et al. (18) and Gur et al. (19) observed that PBMT appears to be effective in reducing pain and disability triggered by subacute and chronic LBP respectively. While Konstantinovic et al. (20) and Vallone et al. (21) found that PBMT combined with nonsteroidal anti-inflammatory drugs (NSAIDs) and exercise were efficient in reducing pain

1  
2  
3 intensity in patients with acute and chronic LBP respectively. In a recent systematic review,  
4 Glazov et al. (30) found a clinically significant reduction in pain intensity in chronic LBP in  
5 patients treated with PBMT, although a reliable conclusion was hindered by the high  
6 heterogeneity in the parameters of therapy application. Furthermore, a recent clinical practice  
7 guidelines (31) recommended the use of the PBMT as a possible nonpharmacological  
8 treatment for chronic LBP. On the other hand, another trial (32) did not detected differences  
9 between PBMT and placebo treatments on pain and disability in mixed sample of patients  
10 with acute and chronic LBP associated with lumbar disk degeneration. These findings show  
11 that there are still conflicts in the literature about PBMT in LBP. Therefore, high quality and  
12 adequately powered trials are strongly needed.

13  
14  
15  
16  
17  
18  
19  
20 Therefore, in spite of the positive results obtained in the aforementioned studies in  
21 favor of PBMT, some factors warrant further investigation with high-quality studies on the  
22 effects of PBMT applied in isolation in chronic non-specific LBP. Hence, it is necessary to  
23 conduct a high quality, adequately powered, randomized placebo-controlled trial with  
24 outcomes been measured at medium-and long-terms. Therefore, the objective of this study is  
25 to evaluate the effects of PBMT against placebo in patients with chronic non-specific LBP in  
26 the short, medium, and long term for the outcomes of pain intensity, general and specific  
27 disability and global perceived effect.

## 33 34 35 **METHODS AND ANALYSES**

### 36 37 38 **Design**

39  
40  
41 A randomized, triple-blinded (patients, therapists, and outcome assessors), placebo-  
42 controlled trial will be performed. The protocol of this study has been prospectively  
43 registered on Clinicaltrials.gov (NCT03089424).

### 44 45 46 47 48 **Study setting**

49  
50  
51 The study will be conducted at the Center for Excellence in Clinical Research in  
52 Physiotherapy of Universidade Cidade de São Paulo, Brazil.

### 53 54 55 56 57 **Eligibility criteria**

1  
2  
3 The study assessors will determine whether or not patients will be eligible to  
4 participate in the study based on patient history and clinical examination.

5  
6 Inclusion criteria:

- 7  
8 - Patients with non-specific chronic LBP, defined as pain or discomfort between the  
9 costal margins and inferior gluteal folds with or without referred pain to the lower  
10 limbs;  
11  
12 - Persistent LBP for at least 3 months (33);  
13  
14 - Aged between 18 and 65 years;  
15  
16 - Both genders.

17  
18 Exclusion criteria:

- 19  
20 - Patients with severe skin diseases (e.g., skin cancer, erysipelas, severe eczema, severe  
21 dermatitis, severe psoriasis and severe hives lupus);  
22  
23 - Patients with LBP associated with nerve root compromise (measured by clinical  
24 examination of dermatomes, myotomes, and reflexes) (34, 35);  
25  
26 - Serious spinal pathologies such as fractures, tumors, inflammatory and infectious  
27 diseases;  
28  
29 - Decompensated heart disease or metabolic disorders;  
30  
31 - Previous spinal surgery;  
32  
33 - Pregnancy.

### 34 35 36 **Interventions**

37  
38  
39 For ethical reasons, on the first day of treatment, all groups will receive an  
40 information booklet on LBP called "The Back Book" (36) based on the recommendations of  
41 the European Guidelines (35, 37). The booklet can be accessed freely via internet and it has  
42 been translated into Portuguese by our research team. At each treatment session, patients will  
43 receive further explanations on the contents of the booklet. There is consistent evidence that  
44 *The Back Book* is useful for patients with LBP (38) and it has been used in clinical trials  
45 conducted by our research group (39, 40).

46  
47  
48 Patients will then be randomly allocated to two groups to be submitted to the active  
49 PBMT or Placebo interventions. The active and placebo PBMT will be performed using the  
50 same device and the irradiated sites will be the same in both therapies. To ensure blinding for  
51 therapists and patients, the device will emit the same sounds and the same information on the  
52 display regardless of the programmed mode (active or placebo). Furthermore, because the  
53  
54  
55  
56  
57  
58  
59  
60

1  
2  
3 device produces a nonsignificant amount of heat (41), the patients will not be able to know if  
4 active or placebo PBMT will be administered. The device was previously coded as active or  
5 placebo modes, and only one researcher not involved in the randomization, treatment and  
6 evaluation is aware of these codes. Patients will undergo treatment (active PBMT or  
7 placebo), according to prior randomization, 3 times a week (with a minimal interval of 24  
8 hours) for 4 consecutive weeks, totaling 12 therapy sessions. The choice of treatment  
9 frequency was based on Basford et al. (18). The total treatment (active PBMT or placebo)  
10 time will be 27 minutes per patient. The patients will be positioned preferably in prone.  
11 However, in specific cases where patients do not tolerate this position due to pain, we will  
12 respect the patient's preferred positioning. Intervention specifications:

13  
14  
15  
16  
17  
18  
19  
20 1. Active PBMT Group: The PBMT will be performed using the Multi Radiance  
21 Medical™ Super Pulsed Laser MR4™ console (Solon, OH, USA), with the SE25 (emitter  
22 with an area of 4 cm<sup>2</sup>) and LaserShower (emitter with an area of 20 cm<sup>2</sup>) cluster probes as  
23 emitters. Nine sites will be irradiated on the patient's lumbar region. PBMT irradiation sites  
24 were chosen based on previous studies (18-21) and in order to cover the largest possible area  
25 of the lumbar spine: 3 central sites on top of the spinous processes (between T11 and T12,  
26 L2 and L3, L5 and S1), using the SE25 (3000 Hz of frequency, 3 minutes of irradiation per  
27 site, 24.75 J per site, a totalizing 74.25 J irradiated from SE25); in the same direction, but  
28 laterally, 3 sites on the left and 3 on the right (on the paravertebral muscles), using the  
29 LaserShower (1000 Hz of frequency, 3 minutes of irradiation per site, 24.30 J per site, a total  
30 of 145.80 J irradiated from LaserShower). At each treatment session, patients will receive a  
31 total dose of 220.05 J. At the end of the 12 treatments sessions, patients will receive a total  
32 dose of 2640.60 J. Table 1 shows parameters for SE25™ and LaserShower™ cluster probe.

33  
34  
35  
36  
37  
38  
39  
40  
41 This PBMT application protocol was based on the study of Leal Junior et al. (42).  
42  
43 Figure 1 shows the PBMT irradiation sites.  
44  
45  
46  
47  
48  
49  
50  
51  
52  
53  
54  
55  
56  
57  
58  
59  
60

**Table 1.** Parameters for SE25™ and LaserShower™ cluster probe.

|                                                | <b>SE25™</b>                                                                             | <b>LaserShower™</b>                                                                      |
|------------------------------------------------|------------------------------------------------------------------------------------------|------------------------------------------------------------------------------------------|
| Number of lasers                               | 1 Super-pulsed infrared                                                                  | 4 Super-pulsed infrared                                                                  |
| Wavelength (nm)                                | 905 (±1)                                                                                 | 905 (±1)                                                                                 |
| Frequency (Hz)                                 | 3000                                                                                     | 1000                                                                                     |
| Peak power (W) - each                          | 25                                                                                       | 12.5                                                                                     |
| Average mean optical output (mW) - each        | 7.5                                                                                      | 1.25                                                                                     |
| Power density (mW/cm <sup>2</sup> ) - each     | 17.05                                                                                    | 2.84                                                                                     |
| Energy density (J/cm <sup>2</sup> ) - each     | 3.07                                                                                     | 0.511                                                                                    |
| Dose (J) - each                                | 1.35                                                                                     | 0.225                                                                                    |
| Spot size of laser (cm <sup>2</sup> ) - each   | 0.44                                                                                     | 0.44                                                                                     |
| Number of red LEDs                             | 4 Red                                                                                    | 4 Red                                                                                    |
| Wavelength of red LEDs (nm)                    | 640 (±10)                                                                                | 640 (±10)                                                                                |
| Frequency (Hz)                                 | 2                                                                                        | 2                                                                                        |
| Average optical output (mW) - each             | 15                                                                                       | 15                                                                                       |
| Power density (mW/cm <sup>2</sup> ) - each     | 16.67                                                                                    | 16.67                                                                                    |
| Energy density (J/cm <sup>2</sup> ) - each     | 3                                                                                        | 3                                                                                        |
| Dose (J) - each                                | 2.7                                                                                      | 2.7                                                                                      |
| Spot size of red LED (cm <sup>2</sup> ) - each | 0.9                                                                                      | 0.9                                                                                      |
| Number of infrared LEDs                        | 4 Infrared                                                                               | 4 Infrared                                                                               |
| Wavelength of infrared LEDs (nm)               | 875 (±10)                                                                                | 875 (±10)                                                                                |
| Frequency (Hz)                                 | 16                                                                                       | 16                                                                                       |
| Average optical output (mW) - each             | 17.5                                                                                     | 17.5                                                                                     |
| Power density (mW/cm <sup>2</sup> ) - each     | 19.44                                                                                    | 19.44                                                                                    |
| Energy density (J/cm <sup>2</sup> ) - each     | 3.5                                                                                      | 3.5                                                                                      |
| Dose (J) - each                                | 3.15                                                                                     | 3.15                                                                                     |
| Spot Size of LED (cm <sup>2</sup> ) - each     | 0.9                                                                                      | 0.9                                                                                      |
| Magnetic Field (mT)                            | 35                                                                                       | 35                                                                                       |
| Irradiation time per site (sec)                | 180                                                                                      | 180                                                                                      |
| Total dose per site (J)                        | 24.75                                                                                    | 24.30                                                                                    |
| Aperture of device (cm <sup>2</sup> )          | 4                                                                                        | 20                                                                                       |
| Application mode                               | Cluster probe held stationary in skin contact with a 90-degree angle and slight pressure | Cluster probe held stationary in skin contact with a 90-degree angle and slight pressure |

&lt;&lt; Figure 1 &gt;&gt;

2. Placebo PBMT Group: The placebo PBMT will be delivered using the same device that active PBMT, but without any emission of therapeutic dose. Patients will receive a total dose of 0 J in placebo mode. The placebo mode simulates the pragmatism of clinical practice and increases the credibility of the use of the equipment in relation to the treated

1  
2  
3 patients. The placebo technique has already been widely used in other studies with patients  
4 with LBP (40, 43-48), as well as in studies using PBMT (41, 49, 50).

5  
6 We will use two different emitters in PBMT (active or placebo) because we have  
7 different objectives in each application area, which consequently require different  
8 mechanisms of action. We will use the SE25 emitter on the spinous processes in order to  
9 inhibit pain. Considering the smaller area of this emitter (4 cm<sup>2</sup>), the power density will be  
10 increased, which will consequently induce the triggering of inhibitory effects, such as a  
11 decrease in the axonal flow and thus analgesic effects (51, 52). In addition, the higher  
12 frequency used in this emitter will also increase the number of photons that will reach the  
13 target tissue, which will also promote the triggering of inhibitory effects and consequent  
14 analgesic effect. For the erector spinae muscles, we will use the LaserShower 50 (LS50)  
15 emitter in order to promote photobiostimulatory effects, considering the larger area of the  
16 device (20 cm<sup>2</sup>), with consequent lower power density. In addition, this emitter has a lower  
17 frequency, which will consequently decrease the number of photons delivered to the target  
18 tissue. With these factors, we believe that we will promote an increase in the production of  
19 ATP (24, 25), an increase in microcirculation (23) and consequently a decrease in muscle  
20 fatigue and stiffness. This therapeutic strategy using different emitters and different  
21 frequencies showed positive effects in the reduction of nonspecific knee pain in a previous  
22 study that used this same PBMT device and these same emitters (42), however the  
23 frequencies and doses were adapted for back pain patients.  
24  
25  
26  
27  
28  
29  
30  
31  
32  
33  
34  
35  
36  
37  
38  
39

### 40 **Outcomes and blinding**

41  
42  
43 Primary outcomes of the study will be obtained at baseline and immediately after the  
44 last treatment session (4 weeks). Secondary outcomes of the study will be obtained at  
45 baseline, at the end of treatment (4 weeks), and 3, 6, and 12 months after randomization.  
46 These outcomes will be collected by an assessor who will not be aware of patient allocation  
47 to their treatment groups.  
48  
49  
50

51 The primary outcomes of the study will be:

- 52 - Pain intensity measured by the Pain Numerical Rating Scale (53). Pain Numerical  
53 Rating Scale evaluates pain intensity levels perceived by the patient on an 11-point  
54 scale ranging from 0 to 10, with 0 being "no pain" and 10 "the worst possible pain"  
55  
56  
57  
58  
59  
60



(53). Patients will be instructed to score the level of pain intensity based on the last 7 days.

- Disability associated with LBP, as measured by the Roland-Morris Disability Questionnaire (54, 55). The questionnaire consists of 24 items that describe situations that patients may have difficulty performing on a daily basis due to LBP. The greater the number of affirmative answers is, the higher the level of functional disability associated with LBP (53, 55). Patients will be instructed to answer according to their condition on the day of administration of the questionnaire.

The secondary outcomes of the study will be:

- Specific disability, as measured by the Patient-Specific Functional Scale (53). The Patient-Specific Functional Scale is global and can be used for any part of the body. The measurement is done on an 11-point Likert scale for each activity, and the higher the average score is (ranging from 0 and 10 points), the better the patient's ability to perform the activities. The patients will be asked to identify up to three activities that they consider they are incapable of performing or that they have some difficulty performing (53, 56, 57).
- Global perceived effect as measured by the Global Perceived Effect Scale (53). Global Perceived Effect Scale is an 11-point Likert scale, ranging from -5 to +5, that compares the patient's current condition to the onset of symptoms (53). Positive scores represent improvement, while the negative scores represent worsening in relation to the onset of symptoms. Values closer to 5 mean greater intensity of this perception (53).
- Pain intensity measured by the Pain Numerical Rating Scale (53).
- Disability associated with LBP, as measured by the Roland-Morris Disability Questionnaire (54, 55).

### **Participant timeline**

The CONSORT flowchart summarizing experimental procedures and patients are shown in figure 2.

<< Figure 2 >>

### Sample size

The sample calculation of the study was performed to detect a 1-point difference for the outcome pain intensity (as measured by the Pain Numerical Rating Scale) (53), with an estimated standard deviation of 1.84 points and 4 points for the outcome disability associated with LBP (measured by the Roland-Morris Disability Questionnaire) (54, 55), with an estimated standard deviation of 4.9 points. A statistical power of 80% was considered for the two outcomes, with  $\alpha$  of 5% and a possible sample loss of up to 15%. Therefore, a total of 148 patients will be required for the study.

### Recruitment

Patients seeking treatment for chronic LBP will be recruited at primary or secondary care health services. We will partner with supervising clinicians at primary and secondary health services so that they will refer chronic non-specific LBP patients to our study for treatment.

### Randomization

Prior to initiation of treatment, patients will be randomized into their respective intervention groups. The randomization will be generated by a computer program (Excel Office 2010) and performed by a participating researcher not involved with the recruitment or evaluation of patients. This same researcher will be responsible for programming the PBMT device according to the result of the randomization. The PBMT device used in the present study will make the same sounds regardless of the programmed dose and mode (active PBMT or placebo PBMT). This researcher will be instructed not to disclose the programmed intervention to the therapist or any of the patients and other researchers involved in the study until its completion. Patient and therapist will be blinded throughout the treatment. Concealed allocation will be achieved through the use of sequentially numbered, sealed, and opaque envelopes.

### Data collection

The patients will be welcomed by the study's blinded assessor who will determine whether they will be eligible to participate in the study. Subsequently, a file will be

1  
2  
3 completed with the patient's sociodemographic data and clinical history. Next, the primary  
4 outcomes and the secondary outcomes of the study will be collected. Then, all eligible  
5 patients will be randomized and allocated into two treatment groups: active PBMT or  
6 placebo PBMT. At the end of the 12 treatment sessions, the primary and secondary outcomes  
7 of the study participants will be reassessed by the same evaluator who performed the  
8 baseline assessment. The 3, 6, and 12-month follow-ups will be performed by telephone by  
9 the same evaluator who carried out the other evaluations. All of the questionnaires that will  
10 be used in the present study have been fully tested for their measurement properties (53, 55).  
11 These measurement properties were also tested over the phone. Therefore, we are confident  
12 that the assessments are reliable.  
13  
14  
15  
16  
17  
18  
19

### 20 21 **Statistical Analysis**

22  
23  
24 The statistical analysis will be conducted following the principles of intention-to-treat  
25 analysis (58). The normality of the data will be tested by visual inspection of histograms and  
26 the characterization of the participants will be calculated using descriptive statistical tests.  
27 The between-group differences (treatment effects) and their respective 95% confidence  
28 intervals will be calculated by using mixed linear models (59) using the group-by-time  
29 interaction terms. The analyses will be performed using SPSS version 19.  
30  
31  
32  
33  
34

### 35 **Ethics**

36  
37  
38 The present study was approved by the Research Ethics Committee of Universidade  
39 Cidade de São Paulo (UNICID) under number 1.964.094. All patients eligible for the study  
40 will be informed by study assessors of the objectives and will be required to complete the  
41 Informed Consent Form (appendix 1), as determined by Brazilian National Health Council  
42 Resolution 196/96.  
43  
44  
45  
46

47 Research personnel will take all appropriate and customary steps to ensure that data  
48 remain secure and that patient privacy and confidentiality will be maintained.  
49  
50

### 51 **Dissemination Policy**

52  
53  
54  
55 The study will be disseminated through publication in peer-reviewed international  
56 journals, as well as presentations at national and international conferences.  
57  
58  
59  
60

## Discussion

Chronic LBP is a condition that is often associated with disability, emotional alterations, and absenteeism from work (8). Since chronic LBP is very prevalent (11), it has a great financial impact, generating high costs, both direct and indirect (60). This fact demonstrates the importance of the constant investigation of more suitable treatments for LBP, aiming at the well-being of the patient and the reduction of expenses for health systems.

PBMT is one of the interventions recommended for the treatment of chronic LBP (31), however, it is a relatively recent therapy given that the first clinical trial investigating its effects on LBP was published in 1999 (18). Since then, there are still conflicts in the literature about PBMT in LBP. Although there is evidence that PBMT is no better than placebo treatment on pain and disability in a mixed sample of patients with acute and chronic LBP (32), some studies have demonstrated the efficacy of PBMT in chronic and acute LBP (18-21). Nevertheless, there are still issues to be clarified about its efficacy, as there are no high-quality methodological studies that test PBMT versus placebo in LBP patients. To date, studies evaluating the effects of PBMT on chronic non-specific LBP have not been prospectively registered (18-21, 32); have a small sample size (18, 19, 21, 32) and have high risk of bias. In addition, none of the studies were either triple blinded or were analyzed using intention to treat principles.

It is extremely important to carry out studies with high methodological quality aimed at contributing to a better understanding of the effects of PBMT on LBP. Only then will it be possible to determine whether PBMT can be used as one of the treatments of choice for LBP. If the effectiveness of PBMT in LBP is confirmed, it could be used as an alternative method to NSAIDs or opioids, for example, since it causes similar or superior effects to these drugs, shown in other chronic musculoskeletal disorders (61, 62), without the presence of known adverse effects at present. We believe that, by providing relevant and compelling information about PBMT, we will contribute to a safer and more effective clinical practice.

Nevertheless, it is important to highlight that PBMT presents a biphasic dose-response pattern, i.e., within a therapeutic window (dose range) the biostimulation effects can be seen. Very low doses may not trigger responses in the irradiated tissue, whereas very high doses may cause inhibition (52). In addition, the power and time of irradiation are also extremely important parameters to obtain better results with the PBMT (63). Therefore, the

1  
2  
3 choice of PBMT parameters is essential for obtaining positive results and represents an  
4 important challenge in treating any musculoskeletal disorder. To date, there is great  
5 heterogeneity in the parameters of PBMT used for the treatment of LBP, and it is not  
6 possible to conclude the best dose for the treatment of this disorder. Thus, our parameters  
7 were adapted from the best evidence available (42) and took into consideration the dosage  
8 recommended by World Association for Laser Therapy (WALT) (63). Therefore, although  
9 we believe that the dosage chosen for the present study is the most likely to be effective in  
10 triggering the expected results, a limitation of our study is that we will test only one dose of  
11 PBMT.  
12

13  
14  
15  
16  
17  
18 The present study can be considered to have high methodological quality, since it is a  
19 randomized, controlled, and prospectively registered clinical trial. In addition, one of the  
20 strengths of the study is that it is triple-blinded, i.e., evaluators, therapists, and patients will  
21 be blinded to interventions over the course of the study. Finally, the sample size was  
22 calculated to provide the appropriate statistical power to detect precise differences in the  
23 primary outcomes of the study. Therefore, we believe that this study will contribute to the  
24 evidence-based practice of PBMT in patients with chronic LBP.  
25  
26  
27  
28  
29

### 30 31 **Author contributions**

32  
33  
34 SST and LOPC contributed to the concept and design of the study. SST and LOPC  
35 established the hypothesis and wrote the original proposal. SST, LCMC, LSG, ACA, DPN,  
36 FCM, MAA and LOPC contributed significantly in the development of the manuscript.  
37 LCMC and LOPC performed critical revisions of the manuscript. SST, LCMC and LOPC  
38 wrote the final version of the manuscript. All authors read and approved the final version of  
39 the manuscript.  
40  
41  
42  
43  
44

### 45 46 **Conflict of interest**

47 The authors declare no conflict of interest.  
48  
49  
50  
51  
52  
53  
54  
55  
56  
57  
58  
59  
60

**References:**

1. Tulder MV. Chapter 1. European guidelines. *Eur Spine J* 2006;15:134-35.
2. American Academy Of Orthopaedic Surgeons. *US Bone and Joint Decade - The Burden of Musculoskeletal Diseases in the United States*. Rosemont, IL, USA, 2008.
3. Dagenais S, Caro J, Haldeman SA. systematic review of low back pain cost of illness studies in the United States and internationally. *Spine J*. 2008;8:8-20.
4. Murray CJ, Lopez AD. Measuring the global burden of disease. *N Engl J Med*. 2013;369:448-457.
5. Hoy D, Bain C, Williams G, March L, Brooks P, Blyth F, et al. A systematic review of the global prevalence of low back pain. *Arthritis Rheum*. 2012;64:2028-37.
6. Henschke N, Maher CG, Refshauge KM, Herbert RD, Cumming RG, Bleasel J, et al. Prognosis in patients with recent onset low back pain in Australian primary care: inception cohort study. *BMJ*. 2008;337:a171.
7. Costa Lda C, Maher CG, Mcauley JH, Hancock MJ, Herbert RD, Refshauge KM, et al. Prognosis for patients with chronic low back pain: inception cohort study. *BMJ*. 2009;339:b3829.
8. Da C Menezes Costa L, Maher CG, Hancock MJ, Mcauley JH, Herbert RD, Costa LO. The prognosis of acute and persistent low-back pain: a meta-analysis. *CMAJ*. 2012;184:E613-624.
9. Beattie PF, Silfies SP, Jordon M. The evolving role of physical therapists in the long-term management of chronic low back pain: longitudinal care using assisted self-management strategies. *Braz J Phys Ther* 2016;20:580-91.
10. Medeiros FC, Costa LO, Added MA, Salomão EC, Costa LD. Longitudinal Monitoring of Patients With Chronic Low Back Pain During Physical Therapy Treatment Using the STarT Back Screening Tool. *J Orthop Sports Phys Ther*. 2017;47:314-323.
11. Maher C, Underwood M, Buchbinder R. Non-specific low back pain. *Lancet*. 2017;389:736-47.
12. Bjordal JM, Ljunggren AE, Klovning A, Slørdal L. Non-steroidal anti-inflammatory drugs, including cyclo-oxygenase-2 inhibitors, in osteoarthritic knee pain: meta-analysis of randomised placebo controlled trials. *BMJ*. 2004;329:1317.
13. Chou R. Pharmacological management of low back pain. *Drugs*. 2010;70:387-402.
14. Dagenais S, Tricco AC, Haldeman S. Synthesis of recommendations for the assessment and management of low back pain from recent clinical practice guidelines. *Spine J*. 2010;10:514-29.
15. Van Middelkoop M, Rubinstein SM, Kuijpers T, Verhagen AP, Ostelo R, Koes BW, et

- 1  
2  
3 al. A systematic review on the effectiveness of physical and rehabilitation interventions for  
4 chronic non-specific low back pain. *Eur Spine J.* 2011;20:19-39.  
5  
6  
7 16. Bertagnoli R. Disc surgery in motion. *SpineLine.* 2004;5:23-28.  
8  
9 17. Sanders SH, Rucker KS, Anderson KO, Harden RN, Jackson KW, Vicente PJ, et al.  
10 Clinical practice guidelines for chronic non-malignant pain syndrome patients. *J Back*  
11 *Musculoskelet Rehabil.* 1995;5:115-20.  
12  
13 18. Basford JR, Sheffield CG, Harmsen WS. Laser therapy: a randomized, controlled trial of  
14 the effects of low-intensity Nd:YAG laser irradiation on musculoskeletal back pain. *Arch*  
15 *Phys Med Rehabil.* 1999;80:647-52.  
16  
17 19. Gur A, Karakoc M, Cevik R, Nas K, Sarac AJ, Karakoc M. Efficacy of low power laser  
18 therapy and exercise on pain and functions in chronic low back pain. *Lasers Surg Med.*  
19 2003;32:233-38.  
20  
21 20. Konstantinovic LM, Kanjuh ZM, Milovanovic AN, Cutovic MR, Djurovic AG, Savic  
22 VG, et al. Acute low back pain with radiculopathy: a double-blind, randomized, placebo-  
23 controlled study. *Photomed Laser Surg.* 2010;28:553-60.  
24  
25 21. Vallone F, Benedicenti S, Sorrenti E, Schiavetti I, Angiero F. Effect of diode laser in the  
26 treatment of patients with nonspecific chronic low back pain: a randomized controlled trial.  
27 *Photomed Laser Surg.* 2014;32:490-94.  
28  
29 22. Anders JJ, Lanzafame RJ, Arany PR. Low-level light/laser therapy versus  
30 photobiomodulation therapy. *Photomed Laser Surg.* 2015;33:183-184.  
31  
32 23. Tullberg M, Alstergren PJ, Ernberg MM. Effects of low-power laser exposure on  
33 masseter muscle pain and microcirculation. *Pain.* 2003;105:89-96.  
34  
35 24. Silveira PC, Silva LA, Fraga DB, Freitas TP, Streck EL, Pinho R. Evaluation of  
36 mitochondrial respiratory chain activity in muscle healing by low-level laser therapy. *J*  
37 *Photochem Photobiol B.* 2009;4:89-92  
38  
39 25. Albuquerque-Pontes GM, Vieira RP, Tomazoni SS, Caires CO, Nemeth V, Vanin AA, et  
40 al. Effect of pre-irradiation with different doses, wavelengths, and application intervals of  
41 low-level laser therapy on cytochrome c oxidase activity in intact skeletal muscle of rats.  
42 *Lasers Med Sci.* 2015;30:59-66.  
43  
44 26. Xu X, Zhao X, Liu TC, Pan H. Low-intensity laser irradiation improves the  
45 mitochondrial dysfunction of C2C12 induced by electrical stimulation. *Photomed Laser*  
46 *Surg.* 2008;26:197-202.  
47  
48 27. Avni D, Levkovitz S, Maltz L, Oron U. Protection of skeletal muscles from ischemic  
49 injury: low-level laser therapy increases antioxidant activity. *Photomed Laser Surg.*  
50 2005;23:273-277.  
51  
52 28. Rizzi CF, Mauriz JL, Freitas Corrêa DS, Moreira AJ, Zettler CG, Filippin LI, et al.  
53 Effects of low-level laser therapy (LLLT) on the nuclear factor (NF)-kappaB signaling  
54  
55  
56  
57  
58  
59  
60

1  
2  
3 pathway in traumatized muscle. *Lasers Surg Med.* 2006;38:704-13.  
4

5 29. Chow RT, Johnson MI, Lopes-Martins RA, Bjordal JM. Efficacy of low-level laser  
6 therapy in the management of neck pain: a systematic review and meta-analysis of  
7 randomised placebo or active-treatment controlled trials. *Lancet.* 2009;4:1897-908.  
8

9  
10 30. Glazov G, Yelland M, Emery J. Low-level laser therapy for chronic non-specific low  
11 back pain: a meta-analysis of randomised controlled trials. *Acupunct Med.* 2016;34:328-341.  
12

13 31. Qaseem A, Wilt TJ, McLean RM, Forcica MA. Clinical Guidelines Committee of the  
14 American College of Physicians. Noninvasive Treatments for Acute, Subacute, and Chronic  
15 Low Back Pain: A Clinical Practice Guideline From the American College of Physicians.  
16 *Ann Intern Med.* 2017;166:514-530.  
17

18 32. Ay S, Doğan SK, Evcik D. Is low-level laser therapy effective in acute or chronic low  
19 back pain? *Clin Rheumatol.* 2010;29:905-10.  
20

21  
22 33. Airaksinen O, Brox JJ, Cedraschi C, Hildebrandt J, Klüber-Moffett J, Kovacs F, et al.  
23 Chapter 4. European guidelines for the management of chronic nonspecific low back pain.  
24 *Eur Spine J.* 2006;15Suppl2:192-300.  
25

26 34. Magee, DJ. *Orthopedic Physical Assessment.* 6<sup>th</sup> Edition. Alberta, Canada: Elsevier  
27 2008:569-618.  
28

29  
30 35. Delitto A, George SZ, Van Dillen L, Whitman JM, Sowa G, Shekelle P et al. Low Back  
31 Pain. Clinical practice guidelines linked to the international classification of functioning,  
32 disability, and health from the orthopaedic section of the American Physical Therapy  
33 Association. *J Orthop Sports Phys Ther.* 2012;42:A1-A57.  
34

35 36. Manchester MR, Glasgow GW, York JKM, Huddersfield KB, Salford CM, Southampton  
36 TC. *The Back Book. Clinical Guidelines for the Management of Acute Low Back Pain.*  
37 2002;1-28.  
38

39  
40 37. Van Tulder M, Becker A, Bekkering T, Breen A, Del Real MT, Hutchinson A, et al.  
41 Chapter 3. European guidelines for the management of acute nonspecific low back pain in  
42 primary care. *Eur Spine J.* 2006;15Suppl2:S169-191.  
43

44 38. Engers A, Jellema P, Wensing M, Van Der Windt DA, Grol R, Van Tulder MW.  
45 Individual patient education for low back pain. *Cochrane Database Syst Rev.*  
46 2008;23:CD004057.  
47

48 39. Garcia AN, Costa L Da C, Hancock MJ, De Almeida MO, De Souza FS, Costa LO.  
49 Efficacy of the McKenzie method in patients with chronic nonspecific low back pain: a  
50 protocol of randomized placebo-controlled trial. *Phys Ther.* 2015;95:267-273.  
51

52  
53 40. Garcia AN, Hancock M, Costa LCM, De Souza, FS, Gomes GVFO, Almeida MO, et al.  
54 Efficacy of the mechanical diagnosis and therapy in patients with chronic nonspecific low  
55 back pain: a randomized placebo controlled trial. 2017; *Brit J Sports Med* [in press]  
56 doi: 10.1136/bjsports-2016-097327  
57  
58  
59  
60



- 1  
2  
3  
4 41. Grandinetti V, Dos S, Miranda EF, Johnson DS, De Paiva PR, Tomazoni SS, Vanin AA,  
5 et al. The thermal impact of phototherapy with concurrent super-pulsed lasers and red and  
6 infrared LEDs on human skin. *Lasers Med Sci.* 2015;30:1575-81.  
7  
8  
9 42. Leal-Junior EC, Johnson DS, Saltmarche A, Demchak T. Adjunctive use of combination  
10 of super-pulsed laser and light-emitting diodes phototherapy on nonspecific knee pain:  
11 double-blinded randomized placebo-controlled trial. *Lasers Med Sci.* 2014;29:1839-47.  
12  
13 43. Costa LO, Maher CG, Latimer J, Hodges PW, Herbert RD, Refshauge KM.; et al. Motor  
14 control exercise for chronic low back pain: a randomized placebo-controlled trial. *Phys Ther.*  
15 2009;89:1275-86.  
16  
17 44. Kumar SP. Efficacy of segmental stabilization exercise for lumbar segmental instability  
18 in patients with mechanical low back pain: A randomized placebo controlled crossover  
19 study. *N Am J Med Sci.* 2011;3:456-461.  
20  
21 45. Ebadi S, Ansari NN, Naghdi S, Jalaei S, Sadat M, Bagheri H, et al. The effect of  
22 continuous ultrasound on chronic non-specific low back pain: a single blind placebo-  
23 controlled randomized trial. *BMC Musculoskelet Disord.* 2012;13:192.  
24  
25 46. Balthazard P, De Goumoens P, Rivier G, Demeulenaere P, Ballabeni P, Dériaz O.  
26 Manual therapy followed by specific active exercises versus a placebo followed by specific  
27 active exercises on the improvement of functional disability in patients with chronic non  
28 specific low back pain: a randomized controlled trial. *BMC Musculoskelet Disord.*  
29 2012;13:162.  
30  
31 47. Parreira Pdo C, Costa Lda C, Takahashi R, Hespanhol Junior LC, Luz Junior MA, Silva  
32 TM, Costa LO. Kinesio taping to generate skin convolutions is not better than sham taping  
33 for people with chronic non-specific low back pain: a randomised trial. *J Physiother.*  
34 2014;60:90-6.  
35  
36 48. Luz Júnior MA, Sousa MV, Neves LA, Cezar AA, Costa LO. Kinesio Taping® is not  
37 better than placebo in reducing pain and disability in patients with chronic non-specific low  
38 back pain: a randomized controlled trial. *Braz J Phys Ther.* 2015;19:482-90.  
39  
40 49. Antonialli FC, De Marchi T, Tomazoni SS, Vanin AA, Dos Santos Grandinetti V, De  
41 Paiva PR, et al. Phototherapy in skeletal muscle performance and recovery after exercise:  
42 effect of combination of super-pulsed laser and light-emitting diodes. *Lasers Med Sci.*  
43 2014;29:1967-76.  
44  
45 50. Miranda EF, De Oliveira LV, Antonialli FC, Vanin AA, De Carvalho PdeT, Leal-Junior  
46 EC. Phototherapy with combination of super-pulsed laser and light-emitting diodes is  
47 beneficial in improvement of muscular performance (strength and muscular endurance),  
48 dyspnea, and fatigue sensation in patients with chronic obstructive pulmonary disease.  
49 *Lasers Med Sci.* 2015;30:437-43.  
50  
51 51. Chow R, Armati P, Laakso EL, Bjordal JM, Baxter GD. Inhibitory effects of laser  
52 irradiation on peripheral mammalian nerves and relevance to analgesic effects: a systematic  
53 review. *Photomed Laser Surg.* 2011;29:365-81.  
54  
55  
56  
57  
58  
59  
60

- 1  
2  
3  
4 52. Huang YY, Sharma SK, Carrol J, Hamblin MR. Biphasic dose response in low level light  
5 therapy – an update. *Dose Response*. 2011;9:602-618.  
6  
7  
8 53. Costa LO, Maher CG, Latimer J, Ferreira PH, Ferreira ML, Pozzi GC, et al. Clinimetric  
9 testing of three self-report outcome measures for low back pain patients in Brazil: which one  
10 is the best? *Spine (Phila Pa 1976)*. 2008;33:2459-63.  
11  
12 54. Nusbaum L, Natour J, Ferraz MB, Goldenberg J. Translation, adaptation and validation  
13 of the Roland-Morris questionnaire--Brazil Roland-Morris. *Braz J Med Biol Res*.  
14 2001;34:203-210.  
15  
16 55. Costa LO, Maher CG, Latimer J, Ferreira PH, Pozzi GC, Ribeiro RN. Psychometric  
17 characteristics of the Brazilian-Portuguese versions of the Functional Rating Index and the  
18 Roland Morris Disability Questionnaire. *Spine (Phila Pa 1976)*. 2007;32:1902-07.  
19  
20  
21 56. Chatman AB, Hyams SP, Neel JM, Binkley JM, Stratford PW, Schomberg A, et al. The  
22 Patient-Specific Functional Scale: measurement properties in patients with knee dysfunction.  
23 *Phys Ther*. 1997;77:820-29.  
24  
25 57. Pengel LH, Refshauge KM, Maher CG. Responsiveness of pain, disability, and physical  
26 impairment outcomes in patients with low back pain. *Spine (Phila Pa 1976)*. 2004;29:879-83.  
27  
28  
29 58. Elkins MR, Moseley AM. Intention-to-treat analysis. *J Physiother*. 2015;61:165-67.  
30  
31 59. Twisk JWR. *Applied Longitudinal Data Analysis for Epidemiology: A Practical Guide*  
32 ISBN: 0521819768, 9780511061608; 2003.  
33  
34 60. Walker BF, Muller R, Grant WD. Low back pain in Australia adults: the economic  
35 burden. *Asia Pac J Public Health*. 2003;15:79-87.  
36  
37 61. Tomazoni SS, Leal-Junior EC, Frigo L, Pallotta RC, Teixeira S, de Almeida P, et al.  
38 Isolated and combined effects of photobiomodulation therapy, topical nonsteroidal anti-  
39 inflammatory drugs, and physical activity in the treatment of osteoarthritis induced by  
40 papain. *J Biomed Opt*. 2016;21:108001.  
41  
42 62. Tomazoni SS, Leal-Junior EC, Pallotta RC, Teixeira S, De Almeida P, Lopes-Martins  
43 R.Á. Effects of photobiomodulation therapy, pharmacological therapy, and physical exercise  
44 as single and/or combined treatment on the inflammatory response induced by experimental  
45 osteoarthritis. *Lasers Med Sci*. 2017;32:101-108.  
46  
47 63. World Association for Laser Therapy - WALT (2010): Dosage recommendations.  
48 Recommended treatment doses for low level laser therapy. Available in:  
49 <http://www.walt.nu/dosage-recommendations.html>. Accessed May 30, 2017.  
50  
51  
52

## 53 FIGURE LEGENDS

54  
55  
56 Table 1. Parameters for SE25™ and LaserShower™ cluster probe.  
57  
58  
59  
60

1  
2  
3 Figure 1. PBMT irradiation sites.  
4  
5

6 Figure 2. Flow diagram of the study.  
7  
8

9 Appendix 1. Model consent form  
10  
11  
12  
13  
14  
15  
16  
17  
18  
19  
20  
21  
22  
23  
24  
25  
26  
27  
28  
29  
30  
31  
32  
33  
34  
35  
36  
37  
38  
39  
40  
41  
42  
43  
44  
45  
46  
47  
48  
49  
50  
51  
52  
53  
54  
55  
56  
57  
58  
59  
60

For peer review only

1  
2  
3  
4  
5  
6  
7  
8  
9  
10  
11  
12  
13  
14  
15  
16  
17  
18  
19  
20  
21  
22  
23  
24  
25  
26  
27  
28  
29  
30  
31  
32  
33  
34  
35  
36  
37  
38  
39  
40  
41  
42  
43  
44  
45  
46  
47  
48  
49  
50  
51  
52  
53  
54  
55  
56  
57  
58  
59  
60



Figure 1. PBMT irradiation sites.  
109x158mm (300 x 300 DPI)

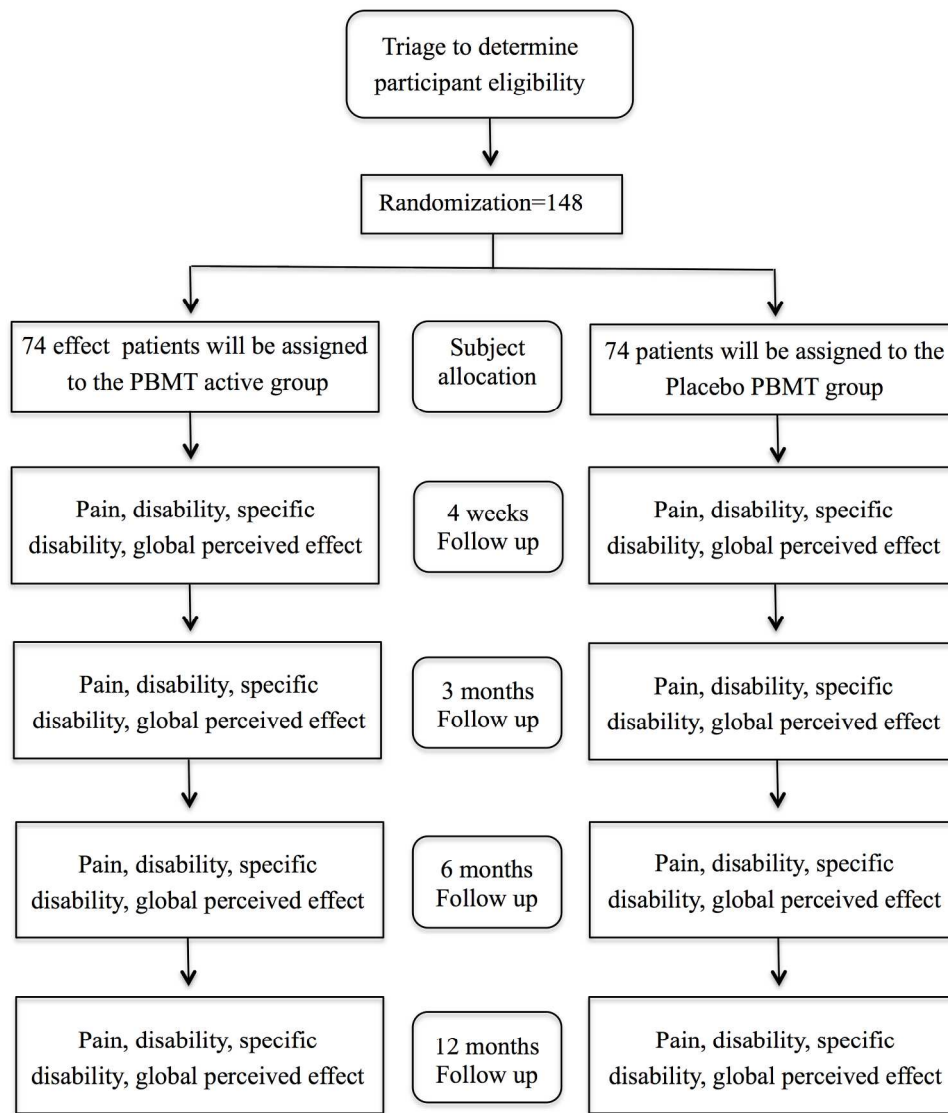

Figure 2. Flow diagram of the study.

197x227mm (300 x 300 DPI)

## Informed Consent Form

To Mr./Mrs. \_\_\_\_\_  
ID no. \_\_\_\_\_, born in \_\_\_\_\_,  
gender \_\_\_\_\_, home address \_\_\_\_\_  
\_\_\_\_\_  
\_\_\_\_\_

You have been invited to participate in the study titled: *"Effects of photobiomodulation therapy in patients with chronic non-specific low back pain: a randomized placebo-controlled trial"*. This trial aims to evaluate the efficacy of photobiomodulation therapy (PBMT) in patients with non-specific chronic low back. In order to participate, you will be firstly screened by one of the researchers, who will determine if you are eligible for the study. If so, you will you respond a number of scales and questionnaires that measure intensity of your low back pain, disability, and impression of recovery since the onset of your symptoms. At the initial assessment, you will be asked to perform some movements of your spine and some tests will be carried out to better understand your clinical condition. You may feel some discomfort during and after the assessment, which tends to improve in the short term. The researchers involved in this study will take all necessary care to minimize these possible discomforts. After the assessment, you will be randomly allocated to two possible interventions: 1) active PBMT (therapy with a light with special properties capable of penetrating the tissues of your body and triggering therapeutic effects) or 2) placebo PBMT (therapy with a light having special properties capable of penetrating the tissues of your body and triggering therapeutic effects, applied at a very low dose below the therapeutic dose). You will not be able to identify which intervention you will be receiving. For safety reasons, during the application of the therapies, you must wear special, dark, protective goggles that will block the passage of light. This equipment will be provided by the therapist. Wearing these glasses will protect your eyes from direct contact with the light, thus avoiding possible damage to your eyesight. If you feel any discomfort during therapy, please notify the therapist and request immediate interruption of the application. In addition, regardless of the group to which you will be allocated, you will also receive an information booklet designed specifically for patients with low back pain (there are several studies that demonstrate the effectiveness of this booklet in patients with low back pain). In addition, you will be free to clarify any questions at each session with your therapist. The treatment will last 12 sessions (3 sessions weekly, for 4 weeks,

1  
2  
3 lasting 30 minutes each). After the end of treatment, you will be reassessed by the same  
4 therapist who evaluated you initially. This therapist will contact you at 3, 6, and 12  
5 months after the beginning of the treatment to measure your symptoms.  
6  
7

8  
9 Any clarifications can be provided by the chief investigator, Leonardo Oliveira Pena  
10 Costa, at Rua Cesário Galeno, 448, Tatuapé or via telephone on (11) 2178-1564.  
11

12 We guarantee the confidentiality of all the information collected and you may withdraw  
13 your consent at any time, without any penalty or loss of benefit.  
14  
15

16  
17 I hereby attest that I have been informed and fully understand the objectives of this study,  
18 the techniques and procedures I will receive, and the risks and discomforts that may occur.  
19 I have received guarantee of total confidentiality and of obtaining further clarification  
20 whenever I wish. Therefore, I agree to voluntarily participate in this study and I  
21 understand that I may withdraw my consent at any time without any penalty or loss of  
22 benefit (if the subject is enrolled in the Institution where the research is being conducted).  
23  
24  
25  
26  
27  
28  
29

30 Date: \_\_ / \_\_ / \_\_  
31  
32

33  
34 \_\_\_\_\_  
35 Signature of study participant or legal representative  
36  
37  
38

39 \_\_\_\_\_  
40 **Chief investigator**  
41  
42

43 I, Leonardo Oliveira Pena Costa, chief investigator of the study "*Effects of*  
44 "*photobiomodulation therapy in patients with chronic non-specific low back pain: a*  
45 "*randomized placebo-controlled trial*" hereby declare that I have obtained the free consent  
46 of this study participant (or his or her legal representative) to conduct this study.  
47  
48  
49  
50

51  
52  
53 Date: \_\_ / \_\_ / \_\_\_\_  
54  
55  
56  
57

58 \_\_\_\_\_  
59 Signature of the chief investigator  
60



SPIRIT 2013 Checklist: Recommended items to address in a clinical trial protocol and related documents\*

| Section/item                      | Item No | Description                                                                                                                                                                                                                                                                              | Page Number |
|-----------------------------------|---------|------------------------------------------------------------------------------------------------------------------------------------------------------------------------------------------------------------------------------------------------------------------------------------------|-------------|
| <b>Administrative information</b> |         |                                                                                                                                                                                                                                                                                          |             |
| Title                             | 1       | Descriptive title identifying the study design, population, interventions, and, if applicable, trial acronym                                                                                                                                                                             | 1           |
| Trial registration                | 2a      | Trial identifier and registry name. If not yet registered, name of intended registry                                                                                                                                                                                                     | 1           |
|                                   | 2b      | All items from the World Health Organization Trial Registration Data Set                                                                                                                                                                                                                 | 1           |
| Protocol version                  | 3       | Date and version identifier                                                                                                                                                                                                                                                              | 1           |
| Funding                           | 4       | Sources and types of financial, material, and other support                                                                                                                                                                                                                              | 1           |
| Roles and responsibilities        | 5a      | Names, affiliations, and roles of protocol contributors                                                                                                                                                                                                                                  | 1           |
|                                   | 5b      | Name and contact information for the trial sponsor                                                                                                                                                                                                                                       | 1           |
|                                   | 5c      | Role of study sponsor and funders, if any, in study design; collection, management, analysis, and interpretation of data; writing of the report; and the decision to submit the report for publication, including whether they will have ultimate authority over any of these activities | 1           |
|                                   | 5d      | Composition, roles, and responsibilities of the coordinating centre, steering committee, endpoint adjudication committee, data management team, and other individuals or groups overseeing the trial, if applicable (see Item 21a for data monitoring committee)                         | 1           |
| <b>Introduction</b>               |         |                                                                                                                                                                                                                                                                                          |             |
| Background and rationale          | 6a      | Description of research question and justification for undertaking the trial, including summary of relevant studies (published and unpublished) examining benefits and harms for each intervention                                                                                       | 4           |
|                                   | 6b      | Explanation for choice of comparators                                                                                                                                                                                                                                                    | 5           |
| Objectives                        | 7       | Specific objectives or hypotheses                                                                                                                                                                                                                                                        | 5           |
| Trial design                      | 8       | Description of trial design including type of trial (eg, parallel group, crossover, factorial, single group), allocation ratio, and framework (eg, superiority, equivalence, noninferiority, exploratory)                                                                                | 5           |



**Methods: Participants, interventions, and outcomes**

|                      |     |                                                                                                                                                                                                                                                                                                                                                                                |       |
|----------------------|-----|--------------------------------------------------------------------------------------------------------------------------------------------------------------------------------------------------------------------------------------------------------------------------------------------------------------------------------------------------------------------------------|-------|
| Study setting        | 9   | Description of study settings (eg, community clinic, academic hospital) and list of countries where data will be collected. Reference to where list of study sites can be obtained                                                                                                                                                                                             | 5     |
| Eligibility criteria | 10  | Inclusion and exclusion criteria for participants. If applicable, eligibility criteria for study centres and individuals who will perform the interventions (eg, surgeons, psychotherapists)                                                                                                                                                                                   | 6     |
| Interventions        | 11a | Interventions for each group with sufficient detail to allow replication, including how and when they will be administered                                                                                                                                                                                                                                                     | 6, 7  |
|                      | 11b | Criteria for discontinuing or modifying allocated interventions for a given trial participant (eg, drug dose change in response to harms, participant request, or improving/worsening disease)                                                                                                                                                                                 | 6, 7  |
|                      | 11c | Strategies to improve adherence to intervention protocols, and any procedures for monitoring adherence (eg, drug tablet return, laboratory tests)                                                                                                                                                                                                                              | 6     |
|                      | 11d | Relevant concomitant care and interventions that are permitted or prohibited during the trial                                                                                                                                                                                                                                                                                  | 6, 7  |
| Outcomes             | 12  | Primary, secondary, and other outcomes, including the specific measurement variable (eg, systolic blood pressure), analysis metric (eg, change from baseline, final value, time to event), method of aggregation (eg, median, proportion), and time point for each outcome. Explanation of the clinical relevance of chosen efficacy and harm outcomes is strongly recommended | 9, 10 |
| Participant timeline | 13  | Time schedule of enrolment, interventions (including any run-ins and washouts), assessments, and visits for participants. A schematic diagram is highly recommended (see Figure)                                                                                                                                                                                               | 9     |
| Sample size          | 14  | Estimated number of participants needed to achieve study objectives and how it was determined, including clinical and statistical assumptions supporting any sample size calculations                                                                                                                                                                                          | 10    |
| Recruitment          | 15  | Strategies for achieving adequate participant enrolment to reach target sample size                                                                                                                                                                                                                                                                                            | 11    |

**Methods: Assignment of interventions (for controlled trials)**

## Allocation:

|                     |     |                                                                                                                                                                                                                                                                                                                                                          |    |
|---------------------|-----|----------------------------------------------------------------------------------------------------------------------------------------------------------------------------------------------------------------------------------------------------------------------------------------------------------------------------------------------------------|----|
| Sequence generation | 16a | Method of generating the allocation sequence (eg, computer-generated random numbers), and list of any factors for stratification. To reduce predictability of a random sequence, details of any planned restriction (eg, blocking) should be provided in a separate document that is unavailable to those who enrol participants or assign interventions | 11 |
|---------------------|-----|----------------------------------------------------------------------------------------------------------------------------------------------------------------------------------------------------------------------------------------------------------------------------------------------------------------------------------------------------------|----|

|    |                                                           |     |                                                                            |        |
|----|-----------------------------------------------------------|-----|----------------------------------------------------------------------------|--------|
| 1  |                                                           |     |                                                                            |        |
| 2  | Allocation                                                | 16b | Mechanism of implementing the allocation sequence (eg, central             | 11     |
| 3  | concealment                                               |     | telephone; sequentially numbered, opaque, sealed envelopes),               |        |
| 4  | mechanism                                                 |     | describing any steps to conceal the sequence until interventions are       |        |
| 5  |                                                           |     | assigned                                                                   |        |
| 6  |                                                           |     |                                                                            |        |
| 7  | Implementation                                            | 16c | Who will generate the allocation sequence, who will enrol participants,    | 11     |
| 8  |                                                           |     | and who will assign participants to interventions                          |        |
| 9  |                                                           |     |                                                                            |        |
| 10 | Blinding                                                  | 17a | Who will be blinded after assignment to interventions (eg, trial           | 11     |
| 11 | (masking)                                                 |     | participants, care providers, outcome assessors, data analysts), and       |        |
| 12 |                                                           |     | how                                                                        |        |
| 13 |                                                           |     |                                                                            |        |
| 14 |                                                           | 17b | If blinded, circumstances under which unblinding is permissible, and       | 11     |
| 15 |                                                           |     | procedure for revealing a participant's allocated intervention during the  |        |
| 16 |                                                           |     | trial                                                                      |        |
| 17 |                                                           |     |                                                                            |        |
| 18 |                                                           |     |                                                                            |        |
| 19 | <b>Methods: Data collection, management, and analysis</b> |     |                                                                            |        |
| 20 |                                                           |     |                                                                            |        |
| 21 | Data collection                                           | 18a | Plans for assessment and collection of outcome, baseline, and other        | 9, 10  |
| 22 | methods                                                   |     | trial data, including any related processes to promote data quality (eg,   |        |
| 23 |                                                           |     | duplicate measurements, training of assessors) and a description of        |        |
| 24 |                                                           |     | study instruments (eg, questionnaires, laboratory tests) along with their  |        |
| 25 |                                                           |     | reliability and validity, if known. Reference to where data collection     |        |
| 26 |                                                           |     | forms can be found, if not in the protocol                                 |        |
| 27 |                                                           |     |                                                                            |        |
| 28 |                                                           |     |                                                                            |        |
| 29 |                                                           | 18b | Plans to promote participant retention and complete follow-up, including   | 11, 12 |
| 30 |                                                           |     | list of any outcome data to be collected for participants who discontinue  |        |
| 31 |                                                           |     | or deviate from intervention protocols                                     |        |
| 32 |                                                           |     |                                                                            |        |
| 33 | Data                                                      | 19  | Plans for data entry, coding, security, and storage, including any related | 11, 12 |
| 34 | management                                                |     | processes to promote data quality (eg, double data entry; range checks     |        |
| 35 |                                                           |     | for data values). Reference to where details of data management            |        |
| 36 |                                                           |     | procedures can be found, if not in the protocol                            |        |
| 37 |                                                           |     |                                                                            |        |
| 38 |                                                           |     |                                                                            |        |
| 39 | Statistical                                               | 20a | Statistical methods for analysing primary and secondary outcomes.          | 12     |
| 40 | methods                                                   |     | Reference to where other details of the statistical analysis plan can be   |        |
| 41 |                                                           |     | found, if not in the protocol                                              |        |
| 42 |                                                           |     |                                                                            |        |
| 43 |                                                           | 20b | Methods for any additional analyses (eg, subgroup and adjusted             | -      |
| 44 |                                                           |     | analyses)                                                                  |        |
| 45 |                                                           |     |                                                                            |        |
| 46 |                                                           | 20c | Definition of analysis population relating to protocol non-adherence (eg,  | 12     |
| 47 |                                                           |     | as randomised analysis), and any statistical methods to handle missing     |        |
| 48 |                                                           |     | data (eg, multiple imputation)                                             |        |
| 49 |                                                           |     |                                                                            |        |
| 50 | <b>Methods: Monitoring</b>                                |     |                                                                            |        |
| 51 |                                                           |     |                                                                            |        |
| 52 | Data monitoring                                           | 21a | Composition of data monitoring committee (DMC); summary of its role        | -      |
| 53 |                                                           |     | and reporting structure; statement of whether it is independent from the   |        |
| 54 |                                                           |     | sponsor and competing interests; and reference to where further details    |        |
| 55 |                                                           |     | about its charter can be found, if not in the protocol. Alternatively, an  |        |
| 56 |                                                           |     | explanation of why a DMC is not needed                                     |        |
| 57 |                                                           |     |                                                                            |        |
| 58 |                                                           |     |                                                                            |        |
| 59 |                                                           |     |                                                                            |        |
| 60 |                                                           |     |                                                                            |        |

|    |                                 |     |                                                                              |    |
|----|---------------------------------|-----|------------------------------------------------------------------------------|----|
| 1  |                                 | 21b | Description of any interim analyses and stopping guidelines, including       | -  |
| 2  |                                 |     | who will have access to these interim results and make the final             |    |
| 3  |                                 |     | decision to terminate the trial                                              |    |
| 4  |                                 |     |                                                                              |    |
| 5  |                                 |     |                                                                              |    |
| 6  | Harms                           | 22  | Plans for collecting, assessing, reporting, and managing solicited and       | -  |
| 7  |                                 |     | spontaneously reported adverse events and other unintended effects of        |    |
| 8  |                                 |     | trial interventions or trial conduct                                         |    |
| 9  |                                 |     |                                                                              |    |
| 10 | Auditing                        | 23  | Frequency and procedures for auditing trial conduct, if any, and             | -  |
| 11 |                                 |     | whether the process will be independent from investigators and the           |    |
| 12 |                                 |     | sponsor                                                                      |    |
| 13 |                                 |     |                                                                              |    |
| 14 |                                 |     |                                                                              |    |
| 15 | <b>Ethics and dissemination</b> |     |                                                                              |    |
| 16 |                                 |     |                                                                              |    |
| 17 | Research ethics approval        | 24  | Plans for seeking research ethics committee/institutional review board       | 12 |
| 18 |                                 |     | (REC/IRB) approval                                                           |    |
| 19 |                                 |     |                                                                              |    |
| 20 | Protocol amendments             | 25  | Plans for communicating important protocol modifications (eg, changes        | -  |
| 21 |                                 |     | to eligibility criteria, outcomes, analyses) to relevant parties (eg,        |    |
| 22 |                                 |     | investigators, REC/IRBs, trial participants, trial registries, journals,     |    |
| 23 |                                 |     | regulators)                                                                  |    |
| 24 |                                 |     |                                                                              |    |
| 25 | Consent or assent               | 26a | Who will obtain informed consent or assent from potential trial              | 12 |
| 26 |                                 |     | participants or authorised surrogates, and how (see Item 32)                 |    |
| 27 |                                 |     |                                                                              |    |
| 28 |                                 | 26b | Additional consent provisions for collection and use of participant data     | -  |
| 29 |                                 |     | and biological specimens in ancillary studies, if applicable                 |    |
| 30 |                                 |     |                                                                              |    |
| 31 | Confidentiality                 | 27  | How personal information about potential and enrolled participants will      | 12 |
| 32 |                                 |     | be collected, shared, and maintained in order to protect confidentiality     |    |
| 33 |                                 |     | before, during, and after the trial                                          |    |
| 34 |                                 |     |                                                                              |    |
| 35 |                                 |     |                                                                              |    |
| 36 | Declaration of interests        | 28  | Financial and other competing interests for principal investigators for      | 1  |
| 37 |                                 |     | the overall trial and each study site                                        |    |
| 38 |                                 |     |                                                                              |    |
| 39 | Access to data                  | 29  | Statement of who will have access to the final trial dataset, and            | 10 |
| 40 |                                 |     | disclosure of contractual agreements that limit such access for              |    |
| 41 |                                 |     | investigators                                                                |    |
| 42 |                                 |     |                                                                              |    |
| 43 | Ancillary and post-trial care   | 30  | Provisions, if any, for ancillary and post-trial care, and for compensation  | -  |
| 44 |                                 |     | to those who suffer harm from trial participation                            |    |
| 45 |                                 |     |                                                                              |    |
| 46 | Dissemination policy            | 31a | Plans for investigators and sponsor to communicate trial results to          | 12 |
| 47 |                                 |     | participants, healthcare professionals, the public, and other relevant       |    |
| 48 |                                 |     | groups (eg, via publication, reporting in results databases, or other data   |    |
| 49 |                                 |     | sharing arrangements), including any publication restrictions                |    |
| 50 |                                 |     |                                                                              |    |
| 51 |                                 |     |                                                                              |    |
| 52 |                                 | 31b | Authorship eligibility guidelines and any intended use of professional       | -  |
| 53 |                                 |     | writers                                                                      |    |
| 54 |                                 |     |                                                                              |    |
| 55 |                                 | 31c | Plans, if any, for granting public access to the full protocol, participant- | -  |
| 56 |                                 |     | level dataset, and statistical code                                          |    |
| 57 |                                 |     |                                                                              |    |
| 58 |                                 |     |                                                                              |    |
| 59 |                                 |     |                                                                              |    |
| 60 |                                 |     |                                                                              |    |

**Appendices**

|                            |    |                                                                                                                                                                                                |
|----------------------------|----|------------------------------------------------------------------------------------------------------------------------------------------------------------------------------------------------|
| Informed consent materials | 32 | Model consent form and other related documentation given to participants and authorised surrogates                                                                                             |
| Biological specimens       | 33 | Plans for collection, laboratory evaluation, and storage of biological specimens for genetic or molecular analysis in the current trial and for future use in ancillary studies, if applicable |

---

\*It is strongly recommended that this checklist be read in conjunction with the SPIRIT 2013 Explanation & Elaboration for important clarification on the items. Amendments to the protocol should be tracked and dated. The SPIRIT checklist is copyrighted by the SPIRIT Group under the Creative Commons "[Attribution-NonCommercial-NoDerivs 3.0 Unported](#)" license.
